# Supplementary material
Source: Research Square preprint supplement (doi:10.21203/rs.3.rs-10115031/v1)
Supplement: Supplementary file 1 [file 9788bf0d844842cb0b8f37b5.docx]

Table 1 Baseline characteristics of patients in the FAS

|  | Adonertinib (n=175) | Afatinib (n=171) |
| --- | --- | --- |
| Age |  |  |
| Median (range), years | 63.0 (32-82) | 66.0 (28-85) |
| ≤65 | 110 (62.9) | 85 (49.7) |
| >65 | 65 (37.1) | 86 (50.3) |
| Sex |  |  |
| Male | 74 (42.3) | 78 (45.6) |
| Female | 101 (57.7) | 93 (54.4) |
| Ethnicity |  |  |
| Han | 167 (95.4) | 161 (94.2) |
| Others | 8 (4.6) | 10 (5.8) |
| ECOG PS |  |  |
| 0 | 54 (30.9) | 42 (24.6) |
| 1 | 121 (69.1) | 129 (75.4) |
| Smoking history |  |  |
| Yes | 49 (28.0) | 48 (28.1) |
| No | 126 (72.0) | 123 (71.9) |
| Clinical stage |  |  |
| IIIB | 7 (4.0) | 12 (7.0) |
| IIIC | 6 (3.4) | 7 (4.1) |
| IVA | 63 (36.0) | 47 (27.5) |
| IVB | 79 (45.1) | 80 (46.8) |
| Others | 20 (11.4) | 25 (14.6) |
| Histological types |  |  |
| Adenocarcinoma | 171 (97.7) | 169 (98.8) |
| Others | 4 (2.3) | 2 (1.2) |
| Brain metastasis |  |  |
| Yes | 56 (32.0) | 58 (33.9) |
| No | 119 (68.0) | 113 (66.1) |
| *EGFR* alteration type |  |  |
| Exon 19 deletion | 88 (50.3) | 88 (51.5) |
| L858R | 88 (50.3) | 88 (51.5) |
| Previous treatment |  |  |
| Surgery | 26 (14.9) | 17 (9.9) |
| Chemotherapy | 12 (3.5) | 8 (4.6) |
| Radiotherapy | 4 (2.3) | 6 (1.7) |
| Other treatment | 20 (11.4) | 17 (9.9) |

Data are n (%) unless otherwise specified..

ECOG, Eastern Cooperative Oncology Group; EGFR, epidermal growth factor receptor; PS, performance status.

**Note:** 7 patients harbored concurrent EGFR Ex19del and *EGFR* L858R mutations, 3 patients in the adonertinib group and 4 patients in the afatinib group; 1 patient was not tested for *EGFR* mutation in the adonertinib group.

Table 2 Efficacy assessed by BICR in the FAS

|  | Adonertinib (n=175) | Afatinib (n=171) |
| --- | --- | --- |
| BOR, n (%) |  |  |
| CR | 0 (0.0) | 0 (0.0) |
| PR | 133 (76.0) | 143 (83.6) |
| SD | 22 (12.6) | 14 (8.2) |
| Non-CR/non-PD | 5 (2.9) | 1 (0.6) |
| PD | 8 (4.6) | 9 (5.3) |
| NE | 7 (4.0) | 4 (2.3) |
| ORR, n (%) | 133 (76.0) | 143 (83.6) |
| 95% CI | (69.0, 82.1) | (77.2, 88.8) |
| P value | 0.0687 | |
| DCR, n (%) | 160 (91.4) | 158 (92.4) |
| 95% CI | (86.3, 95.1) | (87.4, 95.9) |
| P value | 0.7376 | |
| DepOR |  |  |
| LS Mean±SE | -45.9±1.4 | -52.6±1.4 |
| 95%CI | (-48.7, -43.1) | (-55.4, -49.8) |
| P value | 0.0006 | |
| DoR, months, median (95% CI) | 18.6 (15.3, 23.4) | 13.1 (11.0, 13.9) |
| HR | 0.55 (0.40, 0.74) | |
| P value | 0.0002 | |
| PFS, months, median (95% CI) | 16.7 (14.5, 20.8) | 14.5 (12.5, 16.5) |
| HR | 0.70 (0.54, 0.91) | |
| P value | 0.0087 | |
| OS, months, median (95% CI) | NE (34.8, NE) | NE (30.8, NE) |
| HR | 1.03 (0.73, 1.45) | |
| P value | 0.8547 | |

BOR, best overall response; CI, confidence interval; CR, complete response; DCR, disease control rate; DepOR, depth of objective response; DoR, duration of response; HR, hazard ratio; LS, least squares; NE, not evaluable; ORR, objective response rate; OS, overall survival; PD, progressive disease; PFS, progression-free survival; PR, partial response; SD, stable disease; SE, standard error.

Table 3 TRAEs

|  | Any grade |  |  |  | ≥Grade 3 |  |  |
| --- | --- | --- | --- | --- | --- | --- | --- |
|  | Adonertinib (N=172) | Afatinib (N=171) | *P* value |  | Adonertinib (N=172) | Afatinib (N=171) | *P* value |
| Any | 143 (83.1) | 171 (100.0) | <0.0001 |  | 24 (14.0) | 62 (36.3) | <0.0001 |
| Platelets decreased | 42 (24.4) | 7 (4.1) | <0.0001 |  | 1 (0.6) | 0 (0.0) | 1 |
| Diarrhoea | 38 (22.1) | 150 (87.7) | <0.0001 |  | 0 (0.0) | 29 (17.0) | <0.0001 |
| Anaemia | 34 (19.8) | 27 (15.8) | 0.3971 |  | 0 (0.0) | 2 (1.2) | 0.2478 |
| Creatinine increased | 30 (17.4) | 19 (11.1) | 0.1223 |  |  |  |  |
| White blood cell count decreased | 29 (16.9) | 14 (8.2) | 0.0216 |  |  |  |  |
| Lymphocyte count decreased | 29 (16.9) | 6 (3.5) | <0.0001 |  | 4 (2.3) | 0 (0.0) | 0.1228 |
| Rash | 27 (15.7) | 83 (48.5) | <0.0001 |  | 0 (0.0) | 8 (4.7) | 0.0035 |
| Lactate dehydrogenase increased | 26 (15.1) | 16 (9.4) | 0.1376 |  |  |  |  |
| Hyperuricaemia | 25 (14.5) | 22 (12.9) | 0.7538 |  |  |  |  |
| Hypercholesterolemia | 22 (12.8) | 4 (2.3) | 0.0003 |  |  |  |  |
| ALT increased | 21 (12.2) | 37 (21.6) | 0.0216 |  |  |  |  |
| Absolute neutrophil count decreased | 20 (11.6) | 14 (8.2) | 0.3666 |  | 0 (0.0) | 1 (0.6) | 0.4985 |
| Hypertriglyceridemia | 20 (11.6) | 11 (6.4) | 0.1309 |  |  |  |  |
| AST increased | 19 (11.0) | 32 (18.7) | 0.0496 |  |  |  |  |
| QT interval prolongation | 19 (11.0) | 8 (4.7) | 0.0433 |  | 1 (0.6) | 0 (0.0) | 1 |
| Alpha hydroxybutyrate dehydrogenase increased | 18 (10.5) | 9 (5.3) | 0.1073 |  |  |  |  |
| Canker sore | 18 (10.5) | 57 (33.3) | <0.0001 |  | 0 (0.0) | 7 (4.1) | 0.0072 |
| Hypoalbuminaemia | 17 (9.9) | 18 (10.5) | 0.8604 |  |  |  |  |
| Weight decreased | 15 (8.7) | 28 (16.4) | 0.0349 |  | 2 (1.2) | 1 (0.6) | 1 |
| Mucositis oral | 13 (7.6) | 43 (25.1) | <0.0001 |  | 0 (0.0) | 6 (3.5) | 0.0147 |
| Anorexi | 13 (7.6) | 21 (12.3) | 0.1528 |  | 1 (0.6) | 2 (1.2) | 0.6228 |
| Vomiting | 8 (4.7) | 21 (12.3) | 0.0119 |  | 0 (0.0) | 2 (1.2) | 0.2478 |
| Hypokalaemia | 8 (4.7) | 20 (11.7) | 0.0185 |  | 0 (0.0) | 2 (1.2) | 0.2478 |
| Paronychia | 2 (1.2) | 67 (39.2) | <0.0001 |  | 0 (0.0) | 4 (2.3) | 0.0607 |

Data are n (%).

ALT, alanine aminotransferase; AST, aspartate aminotransferase; GGT, gamma-glutamyltransferase; TRAEs, treatment-related adverse events.

Table S1 CNS efficacy

|  | Adonertinib (n=55) | Afatinib (n=56) |
| --- | --- | --- |
| BOR, n (%) |  |  |
| CR | 10 (18.2) | 10 (17.9) |
| PR | 20 (36.4) | 17 (30.4) |
| SD | 0 (0) | 0 (0) |
| Non-CR/non-PD | 21 (38.2) | 26 (46.4) |
| PD | 3 (5.5) | 3 (5.4) |
| NE | 1 (1.8) | 0 (0) |
| ORR, n (%) | 30 (54.5) | 27 (48.2) |
| 95% CI | (40.6, 68.0) | (34.7, 62.0) |
| P value | 0.5707 | |
| DCR, n (%) | 51(92.7) | 53(94.6) |
| 95% CI | (82.4,98.0) | (85.1,98.9) |
| P value | 0.7163 | |
| DoR, months, median (95% CI) | NR (8.4, NE) | 10.2 (5.6, 17.9) |
| HR | 0.51 (0.24, 1.10) | |
| P value | 0.0780 | |
| PFS, months, median (95% CI) | 17.6 (10.0, NE) | 14.5 (11.1, 17.9) |
| HR | 0.68 (0.40, 1.16) | |
| P value | 0.1565 | |

Table S2 Summary of AEs

|  | Adonertinib (n=172) | Afatinib (n=171) | *P* value |
| --- | --- | --- | --- |
| TEAEs | 168 (97.7) | 171 (100.0) | 0.1228 |
| TRAEs | 143 (83.1) | 171 (100.0) | <0.0001 |
| TESAEs | 46 (26.7) | 42 (24.6) | 0.7110 |
| TRSAEs | 11 (6.4) | 13 (7.6) | 0.6786 |
| ≥Grade 3 TEAEs | 58 (33.7) | 86 (50.3) | 0.0022 |
| ≥Grade 3 TRAEs | 24 (14.0) | 62 (36.3) | <0.0001 |
| TEAEs leading to treatment interruption | 36 (20.9) | 70 (40.9) | <0.0001 |
| TRAEs leading to treatment interruption | 11 (6.4) | 49 (28.7) | <0.0001 |
| TEAEs leading to dose reduction | 1 (0.6) | 18 (10.5) | <0.0001 |
| TRAEs leading to dose reduction | 1 (0.6) | 18 (10.5) | <0.0001 |
| TEAEs leading to treatment discontinuation | 10 (5.8) | 16 (9.4) | 0.2285 |
| TRAEs leading to treatment discontinuation | 5 (2.9) | 6 (3.5) | 0.7704 |
| TEAEs leading to death | 4 (2.3) | 9(5.3) | 0.1706 |
| TRAEs leading to death | 0 | 0 | - |

Data are n (%).

AE, adverse events; TEAEs, treatment-emergent adverse events; TRAEs, treatment-related adverse events.
