# Supplementary material
Source: Research Square preprint supplement (doi:10.21203/rs.3.rs-10115031/v1)
Supplement: Supplementary file 2 [file c7bf25eb1932733f18faec27.docx]

**A Randomized, Open-Label, Active-Controlled, Multicenter, Phase III Clinical Trial to Evaluate the Efficacy and Safety of FHND9041 versus Afatinib as First-Line Treatment for Patients with EGFR mutation-positive (EGFRm+) Locally Advanced or Metastatic Non-Small Cell Lung Cancer (NSCLC)**

Efficacy and Safety

**Statistical Analysis Plan**(V 1.0)

**Sponsor**: Jiangsu Chuangte Pharmaceutical Technology Co., Ltd.
**Statistical Unit**: Department of Biostatistics, School of Public Health, Nanjing Medical University

May 21, 2025

**Statistical Analysis Plan**

(V1.0)

| **Investigational Drug**: | FHND9041 Capsules |
| --- | --- |
| **Study Title**: | A Randomized, Open-Label, Active-Controlled, Multicenter Phase III Clinical Trial to Evaluate the Efficacy and Safety of FHND9041 Versus Afatinib as First-Line Treatment for Patients with EGFR mutation-positive (EGFRm+) Locally Advanced or Metastatic Non-Small Cell Lung Cancer(NSCLC) |
| **Clinical Phase**: | Phase III |
| **Sponsor**: | Jiangsu Chuangte Pharmaceutical Technology Co., Ltd. |
| **Principal Investigator**: | Yuankai Shi |
| **Protocol Version Date**: | V1.0; May 25, 2021 |

**Version History**

| **SAP Version, Date** | **Protocol Version, Date** | **Author/Reviewer** | **Revision Description** |
| --- | --- | --- | --- |
| V0.1, July 17, 2024 | V1.0, May 25, 2021 | YuanpingYue/  Donghua Lou | Initial draft |
| V1.0, May 21, 2025 | V1.0, May 25, 2021 | YuanpingYue/  Donghua Lou | Added estimand, supplementary analysis for primary efficacy endpoint; finalized |

**Signature Page**

**Study Title**: A Randomized, Open-Label, Active-Controlled, Multicenter Phase III Clinical Trial to Evaluate the Efficacy and Safety of FHND9041 Versus Afatinib as First-Line Treatment for Patients with EGFR mutation-positive(EGFRm+) Locally Advanced or Metastatic Non-Small Cell Lung Cancer(NSCLC)

**Sponsor**: Jiangsu Chuangte Pharmaceutical Technology Co., Ltd.
**Signature:** _________________________    **Date:** _________________________

Statistical **Unit**: Department of Biostatistics, School of Public Health, Nanjing Medical University
**Author**: _________________________     **Date**: _________________________
**Reviewer**: _________________________    **Date**: _________________________

Table of Contents

[Statistical Analysis Plan 2](#_Toc207110163)

[Version History 3](#_Toc207110164)

[Signature Page 4](#_Toc207110165)

[1. List of Abbreviations 7](#_Toc207110166)

[2. Study Design 8](#_Toc207110167)

[2.1 Study Objectives 8](#_Toc207110168)

[2.2 Estimands 8](#_Toc207110169)

[2.2.1 Primary Estimand 8](#_Toc207110170)

[2.2.2 Secondary Estimand 1 9](#_Toc207110171)

[2.2.3 Secondary Estimand 2 9](#_Toc207110172)

[2.2.4 Secondary Estimand 3 9](#_Toc207110173)

[2.2.5 Secondary Estimand 4 10](#_Toc207110174)

[2.2.6 Secondary Estimand 5 10](#_Toc207110175)

[2.3 Study Population 10](#_Toc207110176)

[2.4 Study Design 10](#_Toc207110177)

[2.5 Sample Size Determination 11](#_Toc207110178)

[2.6 Randomization Method 11](#_Toc207110179)

[2.7 Blinding Design 12](#_Toc207110180)

[2.8 Interim Analysis 12](#_Toc207110181)

[2.9 Modifications to Statistical Analysis in the Protocol 12](#_Toc207110182)

[3. Efficacy Endpoints 12](#_Toc207110183)

[3.1 Primary Efficacy Endpoint 12](#_Toc207110184)

[3.2 Secondary Efficacy Endpoints 12](#_Toc207110185)

[3.3 Efficacy Evaluation Criteria 15](#_Toc207110186)

[4. Safety Endpoints 16](#_Toc207110187)

[4.1 Adverse Events (AEs) 16](#_Toc207110188)

[4.2 Adverse Drug Reactions (ADRs) 16](#_Toc207110189)

[4.3 Serious Adverse Events (SAEs) 17](#_Toc207110190)

[4.4 Vital Signs and Physical Examinations 17](#_Toc207110191)

[4.5 Laboratory Tests 17](#_Toc207110192)

[4.6 12-Lead Electrocardiogram (ECG) 17](#_Toc207110193)

[4.7 Cardiac Ultrasound 18](#_Toc207110194)

[4.8 ECOG Performance Status 18](#_Toc207110195)

[5. Other Endpoints 18](#_Toc207110196)

[6. Analysis Sets 18](#_Toc207110197)

[6.1 Full Analysis Set (FAS) 18](#_Toc207110198)

[6.2 Per Protocol Set (PPS) 18](#_Toc207110199)

[6.3 Safety Analysis Set (SAS) 18](#_Toc207110200)

[7. Statistical Analysis 19](#_Toc207110201)

[7.1 General Principles 19](#_Toc207110202)

[7.1.1 Significance Level 19](#_Toc207110203)

[7.1.2 Hypothesis Testing 19](#_Toc207110204)

[7.1.3 Handling of Missing Data 20](#_Toc207110205)

[7.1.4 Data Conventions 20](#_Toc207110206)

[7.2 Study Populations 22](#_Toc207110207)

[7.2.1 Subject Distribution 22](#_Toc207110208)

[7.2.2 Protocol Deviations 22](#_Toc207110209)

[7.2.3 Subject Characteristics Analysis 22](#_Toc207110210)

[7.3 Efficacy Evaluation 23](#_Toc207110211)

[7.3.1 Primary Efficacy Endpoint 23](#_Toc207110212)

[7.3.2 Secondary Efficacy Endpoints 24](#_Toc207110213)

[7.4 Safety Evaluation 26](#_Toc207110214)

[7.4.1 Drug Exposure and Dose Adjustments 27](#_Toc207110215)

[7.4.2 Adverse Events 27](#_Toc207110216)

[7.4.3 Vital Signs 28](#_Toc207110217)

[7.4.4 Laboratory Parameters 28](#_Toc207110218)

[7.4.5 Electrocardiogram (ECG) 28](#_Toc207110219)

[7.4.6 Echocardiogram 29](#_Toc207110220)

[7.4.7 Physical Examination 29](#_Toc207110221)

[7.4.8 Body Weight 29](#_Toc207110222)

[7.4.9 Concomitant Medications 29](#_Toc207110223)

[7.5 Interim Analysis 29](#_Toc207110224)

[7.6 Subgroup Analysis 30](#_Toc207110225)

[7.7 Other Analyses 30](#_Toc207110226)

[8. Statistical Analysis Software 30](#_Toc207110227)

[9. References 30](#_Toc207110228)

[10. Appendices 31](#_Toc207110229)

## 1. List of Abbreviations

| ADR | Adverse Drug Reaction |
| --- | --- |
| AE | Adverse Event |
| ANOVA | Analysis of Variance |
| BICR | Blinded Independent Central Review |
| CI | Confidence Interval |
| CR | Complete Response |
| NCI CTC AE | National Cancer Institute Common Terminology Criteria for Adverse Event |
| DCR | Disease Control Rate |
| DepOR | Depth of Response |
| DOR | Duration of Response |
| ECOG | Eastern Cooperative Oncology Group |
| FAS | Full Analysis Set |
| HR | Hazard Ratio |
| ITT | Intention To Treat |
| IWRS | Interactive Web Response System |
| Max | Maximum |
| Mean | Mean |
| MedDRA | Medical Dictionary for Regulatory Activities |
| Median | Median |
| Min | Minimum |
| ORR | Objective Response Rate |
| OS | Overall Survival |
| PD | Progressive Disease |
| PFS | Progression Free Survival |
| PPS | Per-Protocol Set |
| PR | Partial Response |
| PT | Preferred Term |
| Q1 | 25th percentile |
| Q3 | 75th percentile |
| RECIST | Response Evaluation Criteria in Solid Tumors |
| SAE | Serious Adverse Event |
| SD | Stable Disease |
| SOC | System Organ Class |
| Std | Standard Deviation |
| SAS | Safety Analysis Set |
| TEAE | Treatment-Emergent Adverse Event |

## 2. Study Design

## 2.1 Study Objectives

**Primary objectives:**

To evaluate the efficacy of FHND9041 vesus Afatinib as first-line treatment for patients with EGFRm+ locally advanced or metastatic NSCLC. The primary efficacy endpoint is Progression-Free Survival (PFS) assessed by Blinded Independent Central Review (BICR).

**Secondary objectives:**

1. To evaluate other efficacy endpoints of FHND9041 versus Afatinib as first-line treatment in patients with EGFRm+ locally advanced or metastatic NSCLC, including: Investigator-assessed PFS, Objective Response Rate (ORR), Overall Survival (OS), Duration of Response (DoR), Disease Control Rate (DCR), Depth of Response (DepOR), intracranial ORR and DoR, and Quality of Life Scores (EORTC QLQ-C30/QLQ-LC13 & LCSS questionnaires).
2. To evaluate the safety of FHND9041 versus Afatinib as first-line treatment in patients with EGFRm+ locally advanced or metastatic NSCLC.
3. To conduct a population pharmacokinetic (PopPK) study of FHND9041 capsules.

## 2.2 Estimands

## 2.2.1 Primary Estimand

- Target Population: EGFRm+ locally advanced or metastatic NSCLC patients as defined by the protocol-specified inclusion/exclusion criteria.
- Treatment:
- FHND9041 group: 80 mg orally once daily.
- Afatinib group: 40 mg orally once daily.
- Target Variable: BICR-assessed PFS.
- Intercurrent Events & Handling Strategies:

| **Intercurrent Event** | **Strategy** | **Remarks** |
| --- | --- | --- |
| New antitumor therapy initiated before PFS event | Hypothetical | Censor at last imaging date prior to new therapy, assuming no new therapy occurred. |
| Treatment discontinuation due to AEs | Treatment Policy | Continue follow-up; data after the intercurrent event are included. |
| Treatment discontinuation due to other reasons (subject withdrawal, loss to follow-up, investigator decision) | Treatment Policy | Continue follow-up; data after the intercurrent event are included. |

- Population-Level Summary: Hazard ratio (HR) for BICR-assessed PFS between treatment groups.

## 2.2.2 Secondary Estimand 1

- Target Variable: PFS assessed by investigators.
- All other attributes align with the primary estimand.

## 2.2.3 Secondary Estimand 2

- Target Variable: Objective response rate (ORR).
- Intercurrent Events & Handling Strategies:

| Intercurrent Event | Strategy | Handling |
| --- | --- | --- |
| New antitumor therapy initiated before best response | Hypothetical | Post-therapy efficacy assessments excluded from best response determination. |
| Treatment discontinuation due to AEs | Treatment Policy | Continue follow-up; data after the event are used. |
| Treatment discontinuation due to other reasons | Treatment Policy | Continue follow-up; data after the event are used. |

- Population-Level Summary: Rate difference in ORR between treatment groups.
- All other attributes align with the primary estimand.

## 2.2.4 Secondary Estimand 3

- Target Variable: Overall survival (OS).
- Intercurrent Events & Handling Strategies:

| Intercurrent Event | Strategy | Handling |
| --- | --- | --- |
| New antitumor therapy initiated | Treatment Policy | Continue follow-up; data after the event are used. |

- Population-Level Summary: Hazard ratio (HR) for OS between treatment groups.
- All other attributes align with the primary estimand.

## ****2.2.5 Secondary Estimand 4****

- **Target Variable:** Duration of Response (DoR).
- **Other Attributes:** Align with the primary estimand.

## ****2.2.6 Secondary Estimand 5****

- **Target Variable:** Disease Control Rate (DCR).
- **Other Attributes:** Align with Secondary Estimand 2.

## ****2.3 Study Population****

Patients with **EGFRm+** (EGFR mutation-positive) locally advanced or metastatic non-small cell lung cancer (NSCLC).

## ****2.4 Study Design****

A Randomized, Open-Label, Active-Controlled, Multicenter Phase III Clinical Trial to Evaluate the Efficacy and Safety of FHND9041 Versus Afatinib as First-Line Treatment for Patients with EGFR mutation-positive (EGFRm+) Locally Advanced or Metastatic Non-Small Cell Lung Cancer (NSCLC). The primary efficacy endpoint is progression-free survival (PFS), along with other efficacy indicators and a population pharmacokinetics study.

The study will enroll treatment-naïve patients with EGFR mutation-positive disease (including L858R and/or Exon 19 deletion). Eligible participants will receive study treatment until disease progression according to RECIST 1.1 criteria, intolerable drug-related toxicity, or other study treatment discontinuation criteria defined in the protocol.

Eligible participants will be randomized in a 1:1 ratio to either the Experimental Group or the Control Group (FHND9041 Group: Afatinib Group). The FHND9041 group will receive 80 mg orally once daily; the Afatinib group will receive 40 mg orally once daily.

The study consists of three periods: 1. Screening Period; 2. Treatment Period; 3. Follow-up Period. Eligible participants who provide signed informed consent will be randomized via a central randomization system to either the experimental or control group and will be treated and assessed according to the protocol schedule.

Participants in the experimental group (FHND9041 group) will participate in a population pharmacokinetic (PPK) study. Blood samples (4 mL) will be collected for PPK analysis at the following time points: within 1 hour prior to the first dose, on Day 21 of Cycle 1 (C1D21, window period ±3 days), Day 21 of Cycle 2 (C2D21, window period ±3 days), Day 21 of Cycle 4 (C4D21, window period ±3 days), and on the day of treatment discontinuation.

Participants will continue treatment until disease progression as defined by RECIST 1.1, intolerable drug-related toxicity, or meeting other predefined treatment termination criteria. Tumor imaging assessments by Blinded Independent Central Review (BICR) will follow RECIST 1.1 criteria (intracranial efficacy will be evaluated using RANO-BM criteria), while investigators will conduct tumor assessments per RECIST 1.1. Evaluations will be performed every 6 weeks (±7 days) for the first 18 cycles and every 9 weeks (±7 days) thereafter until disease progression or subject withdrawal. After disease progression is confirmed, survival follow-up will be conducted every 3 months (±7 days).

### ****2.5 Sample Size Determination****

This is a randomized, open-label, active-controlled,, multicenter, superiority-designed Phase III clinical study. The hazard ratio (HR) for progression-free survival (PFS) of FHND9041 compared to Afatinib is hypothesized to be 0.71 (with median PFS of 11 months in the Afatinib group and 15.5 months in the FHND9041 group). The enrollment ratio is set at a 1:1 ratio for the experimental group and the control group. The enrollment period is 12 months, and the study duration is 36 months, with a one-sided alpha of 0.025 and 80% power. A total of 268 events will be required to detect statistical differences in PFS between groups (sample size calculation performed using the Logrank test in PASS software). With an estimated 10% loss to follow-up, approximately 350 patients will need to be enrolled (175 in the experimental group and 175 in the control group).

### ****2.6 Randomization Method****

Eligible participants will be randomized **1:1** to either the experimental or control group via a randomization system. Stratification factors include:

**Mutation type:** L858R mutation vs. Exon 19 deletion mutation.

**Brain metastasis status:** Absence vs. presence.

### ****2.7 Blinding Design****

Not applicable.

### ****2.8 Interim Analysis****

None.

### ****2.9 Modifications to Statistical Analysis in the Protocol****

None.

## 3. Efficacy **Endpoints**

## **3.1 Primary Efficacy Endpoint**

Independent Radiological Review-Assessed Progression-Free Survival (PFS) is defined as the time from randomization to the first documented disease progression per RECIST 1.1 or death due to any cause, whichever occurs first. Statistical analyses will primarily be based on tumor assessments by independent radiological review according to RECIST 1.1 criteria.

## 3.2 Secondary Efficacy Endpoints

- Progression-Free Survival (PFS) by Investigator Assessment: Defined as the time from randomization to the first occurrence of disease progression (per RECIST 1.1) or death from any cause, whichever occurs first. The analysis will be based on tumor assessments performed by the investigator according to RECIST 1.1 criteria.
- Overall Survival (OS): Defined as the time from randomization to death from any cause.
- Objective Response Rate (ORR) by Investigator and Independent Imaging Review: ORR is defined as the proportion of participants in each treatment group achieving a best overall response of complete response (CR) or partial response (PR) (CR + PR) based on assessments by the investigator or independent imaging review.
- Duration of Response (DOR): Defined as the time from the first documented CR or PR to the first occurrence of disease progression (PD) or death from any cause.
- Intracranial ORR, DOR, and PFS
- Depth of Response (DepOR): DepOR refers to the percentage reduction in the sum of the longest diameters of target lesions from baseline after treatment. DepOR better reflects the extent of tumor shrinkage and therapeutic efficacy, with varying DepOR values indicating individual differences in drug response among participants.
- Disease Control Rate (DCR): DCR is defined as the proportion of participants achieving tumor shrinkage or stabilization (CR, PR, or stable disease [SD]) sustained for a predefined duration.
- Quality of Life (QoL) Assessments（EORTC QLQ-C30 and QLQ-LC13 QOL&LCSS Questionnaires）:
- **➢ Quality of Life Scores (EORTC QLQ-C30/LC13 QOL Questionnaire & LCSS)**
- **✓** The 30 items of EORTC QLQ-C30 (V3.0) can be divided into 15 domains, consisting of 5 functional domains (Physical, Role, Cognitive, Emotional, and Social Functioning), 3 symptom domains (Fatigue, Pain, Nausea and Vomiting), 1 Global Health Status/Quality of Life domain, and 6 single items (each as one domain). The classification is shown in the table below.

| **Domain** | **Items** | **Item Numbers** |
| --- | --- | --- |
| Physical Functioning | 5 | 1~5 |
| Role Functioning | 2 | 6~7 |
| Emotional Functioning | 4 | 21~24 |
| Cognitive Functioning | 2 | 20, 25 |
| Social Functioning | 2 | 26~27 |
| Global Health Status | 2 | 29~30 |
| Fatigue | 3 | 10, 12, 18 |
| Nausea and Vomiting | 2 | 14~15 |
| Pain | 2 | 9, 19 |
| Dyspnea | 1 | 8 |
| Insomnia | 1 | 11 |
| Appetite Loss | 1 | 13 |
| Constipation | 1 | 16 |
| Diarrhea | 1 | 17 |
| Financial Difficulties | 1 | 28 |

- The raw score (RS) for each domain is calculated by summing the scores of the included items and dividing by the number of items in that domain, i.e., RS = (Q1 + Q2 + … + Qn) / n. A linear transformation using the range method is applied to convert the raw score into a standardized score (SS) ranging from 0 to 100, calculated using the following formulas (where R is the score range of the domain or item):
- Functional Domains: SS = [1 - (RS - 1) / R] × 100
  Symptom Domains and Global Health Status Domain: SS = [(RS - 1) / R] × 100
- ✓ QLQ-LC13 includes 13 items, which can be divided into 10 domains. The classification is shown in the table below.

| **Domain** | **Items** | **Item Numbers** |
| --- | --- | --- |
| Dyspnea | 3 | 3,4,5 |
| Coughing | 1 | 1 |
| Hemoptysis | 1 | 2 |
| Sore Mouth | 1 | 6 |
| Dysphagia | 1 | 7 |
| Peripheral Neuropathy | 1 | 8 |
| Alopecia | 1 | 9 |
| Chest Pain | 1 | 10 |
| Arm or Shoulder Pain | 1 | 11 |
| Pain in Other Parts | 1 | 12 |

- The raw score (RS) for each domain is calculated by summing the scores of the included items and dividing by the number of items in that domain, i.e., RS = (Q1 + Q2 + … + Qn) / n. A linear transformation using the range method is applied to convert the raw score into a standardized score (SS) ranging from 0 to 100, calculated using the following formula (where R is the score range of the domain or item):
- SS = [(RS - 1) / R] × 100
- ✓ LCSS includes 9 items. The classification is shown in the table below.

| **Domain** | **Items** | **Item Numbers** |
| --- | --- | --- |
| Appetite | 1 | 1 |
| Fatigue | 1 | 2 |
| Cough | 1 | 3 |
| Dyspnea | 1 | 4 |
| Hemoptysis | 1 | 5 |
| Pain | 1 | 6 |
| Lung Cancer Symptoms | 1 | 7 |
| Impact on Activity | 1 | 8 |
| Quality of Life | 1 | 9 |

A linear transformation using the range method is applied to convert the raw score into a standardized score (SS) ranging from 0 to 100, calculated using the following formula (where R is the score range of the domain or item):

SS = [(RS - 1) / R] × 100

## 3.3 Efficacy Evaluation Criteria

- Evaluation was performed according to the Response Evaluation Criteria in Solid Tumors (RECIST 1.1), categorized as Complete Response (CR), Partial Response (PR), Stable Disease (SD), and Progressive Disease (PD). Assessments were performed by both the investigator and Blinded Independent Central Review (BICR).
- Intracranial efficacy was evaluated using the RANO-BM criteria.

## **4. Safety** **Endpoints**

## **4.1 Adverse Events (AEs)**

An Adverse Event (AE) is defined as any untoward medical occurrence in a subject administered a study drug, which may manifest as signs, symptoms, disease, or laboratory abnormality, without implied causal relationship to the treatment. Abnormal laboratory findings constitute an AE only if they induce clinically significant signs/symptoms or require therapeutic intervention.

Tumor progression-related signs/symptoms should not be recorded as AEs, unless they are more severe than expected or deemed by the investigator to be related to study drug/ procedures. New primary malignancies are considered AEs.

Treatment-Emergent Adverse Event (TEAE)

A TEAE is defined as an AE with onset after the first dose of study drug, or a pre-existing event that worsens in severity post-dosing. TEAE determination is based on the date/time of onset. If missing date/time precludes definitive assessment, the event should be classified as a TEAE using a conservative approach. AE summaries will focus on TEAEs.

## 4.2 Adverse Drug Reactions (ADRs)

Adverse Drug Reaction (ADR): The relationship between AEs and the investigational drug is assessed using a five-level classification: definitely related, probably related, possibly related, possibly unrelated, or definitely unrelated. AEs classified as "definitely related," "probably related," or "possibly related" are considered ADRs. AEs with missing relationship assessments are treated as ADRs. ADR incidence is calculated by summing these three categories as the numerator and the total number of participants in the safety analysis as the denominator.

## 4.3 Serious Adverse Events (SAEs)

A Serious Adverse Event (SAE) is an AE meeting at least one of the following criteria:

- Results in death;
- Life-threatening (immediate risk of death, not hypothetical);
- Requires hospitalization or prolongs hospitalization;
- Causes persistent or significant disability/incapacity;
- Congenital anomaly or birth defect.
  Other medically significant events: Events requiring medical/scientific judgment to determine expedited reporting, even if not immediately life-threatening, fatal, or requiring hospitalization, but necessitating intervention to prevent such outcomes.

## 4.4 Vital Signs and Physical Examinations

**➢ Vital Signs: Include temperature (°C), pulse (beats/min), seated blood pressure (mmHg), and respiratory rate (breaths/min).**

**➢ Physical Examination: Includes skin and mucous membranes, superficial lymph nodes, head and its organs, neck, chest, abdomen, rectum, anus, external genitalia, spine and extremities, nervous system, and others.**

**➢ Body Weight**

### ****4.5 Laboratory Tests****

- **Hematology:** Includes red blood cell count, absolute neutrophil count, hemoglobin, neutrophils, eosinophils, basophils, lymphocytes, monocytes, platelet count, and white blood cell count.
- **Urinalysis**: Includes urine glucose, urine protein, urine red blood cells, urine white blood cells, pH, ketones, specific gravity, nitrites, urobilinogen, and urine bilirubin.
- **Blood Biochemistry**: Includes ALT, AST, ALP, TBIL, DBIL, BUN/Urea, Cr, creatinine clearance, GGT, TP, ALB, potassium, sodium, chloride, calcium, magnesium, fasting glucose, LDH, CK, CK-MB, uric acid, triglycerides, and total cholesterol.
- **Coagulation Panel:** Includes prothrombin time (PT), activated partial thromboplastin time (APTT), thrombin time (TT), fibrinogen, international normalized ratio (INR), and D-dimer.

## **4.6 12-Lead Electrocardiogram (ECG)**

HR, PR interval, RR interval, QRS duration, QT interval, QTcF.

## **4.7 Cardiac Ultrasound**

LVEF.

## 4.8 ECOG Performance Status

## **5. Other Endpoints**

None.

## **6. Analysis Sets**

Analysis sets include: Full Analysis Set (FAS), Per Protocol Set (PPS), and Safety Analysis Set (SA).

## 6.1 Full Analysis Set (FAS)

Following the Intent-to-Treat (ITT) principle, the FAS includes all randomized participants and serves as the primary set for efficacy analysis. The FAS is used for all effectiveness and baseline characteristic analyses. Treatment groups are analyzed as randomized.

## 6.2 Per Protocol Set (PPS)

A subset of the FAS, defined as participants without major protocol deviations. Used as a supplementary analysis set for efficacy.

The final PPS is determined before database lock through consensus among the principal investigator, statistician, and sponsor during data review.

## 6.3 Safety Analysis Set (SAS)

Includes all enrolled participants who received at least one dose of the investigational drug and have post-dose safety records. The SAS is used for all safety analyses. Treatment groups are analyzed as actual treatment received.

## 7. Statistical Analysis

## 7.1 General Principles

For continuous variables, the number of non-missing participants, mean, standard deviation, median, minimum, and maximum will be presented.
For categorical variables, they will be presented in frequency tables (counts and percentages).

The table below specifies the decimal places retained for statistical parameters:

**Decimal Places for Statistical Parameters**

| **Statistical Measure** | **Decimal Places Retained** |
| --- | --- |
| Mean, SD, Median | 1 more decimal than raw data, up to 4 decimal places |
| Max, Min | Same as raw data, up to 4 decimal places |
| Percentage | 1 decimal place |
| Statistics, CI | 2 decimal places |
| P-value | 4 decimal places; if all 4 decimals are 0, present as *P*<0.0001 |

## 7.1.1 Significance Level

For inter-group comparisons, all hypothesis tests will use a two-sided test with α=0.05. A *P*≤0.05 will be considered statistically significant. All confidence intervals will use a 95% confidence level.

## 7.1.2 Hypothesis Testing

The primary efficacy endpoint is independent imaging-assessed progression-free survival (PFS).
Inter-group comparisons between the experimental and control arms will use a stratified Log-Rank test:
Hypotheses:

- *H₀*: PFS processes are identical between the experimental and control groups.
- *H₁*: PFS processes differ between the experimental and control groups.
  α level: 0.05 (two-sided).

## 7.1.3 Handling of Missing Data

Missing efficacy data (OS, PFS, DOR) will be treated as censored data, with censoring rules detailed in Table 1.
Missing values in safety evaluations will not be imputed.

## 7.1.4 Data Conventions

① **Missing Dates**:
Where incomplete historical dates impact subsequent date calculations, and no conflict exists with other dates, imputation shall be performed as follows:

- **Survival time-related dates**:
  - *Missing year/month/day of death*: Impute as the last visit date (patient still alive).
  - *Missing day/month of death*:
    - If death "year" matches the last visit year (patient alive), impute as last visit date.
    - If death "year" is later than last visit year, impute as January 1st.
  - *Missing day of death*:
    - If death "year/month" matches last visit "year/month", impute as last visit date.
    - If death "year/month" is later, impute as 1st day of the month.
- **Adverse event (AE-related dates)**:
  - *Missing year/month/day of AE onset*: Leave as missing.
  - *Missing day/month of AE onset*:
    - If onset "year" matches first dose year, impute as first dose date.
    - Otherwise, impute as January 1st.
  - *Missing day of AE onset*:
    - If onset "year/month" matches first dose "year/month", impute as first dose date.
    - Otherwise, impute as 1st day of the month.
  - *Missing year/month/day of AE end*: Leave as missing.
  - *Missing day/month of AE end*: Impute as December 31st.
  - *Missing day of AE end*: Impute as the last day of the month.
- **Concomitant dose dates**:
  - *Missing year/month/day of start*: Leave as missing.
  - *Missing day/month of start*:
    - If start "year" matches first dose year, impute as first dose date.
    - Otherwise, impute as January 1st.
  - *Missing day of start*:
    - If start "year/month" matches first dose "year/month", impute as first dose date.
    - Otherwise, impute as 1st day of the month.
  - *Missing year/month/day of end*: Assume ongoing use (no imputation).
  - *Missing day/month of end*: Impute as December 31st.
  - *Missing day of end*: Impute as the last day of the month.
- **New antitumor therapy start dates**:
  - *Missing year/month/day*: Impute as last dose date.
  - *Missing day/month*:
    - If "year" matches last dose year, impute as last dose date.
    - Otherwise, impute as January 1st.
  - *Missing day*:
    - If "year/month" matches last dose "year/month", impute as last dose date.
    - Otherwise, impute as 1st day of the month.
- **Missing initial diagnosis dates**:
  - *Missing day*: Impute as 1st day of the month.
  - *Missing day/month*: Impute as January 1st.
  - *Missing year/month/day*: Leave as missing.

② **Baseline definition**: Baseline is defined as the last non-missing value prior to first dose. For participants who received trial dose but lack a first dose date, use the last non-missing value before randomization.

③ **Change from baseline**: Defined as *post-treatment follow-up measurement - baseline measurement*.

④ **Percentage change from baseline(%)**: Defined as (post-treatment measurement - baseline measurement)/baseline measurement × 100.

⑤ **Data derivation and transformation**:

**➢ Age: Using "years" as the unit, = (Informed Consent Date - Date of Birth) / 365.25, rounded down to the nearest integer.**

**➢ Body Mass Index (BMI) = Weight (kg) / Height² (m²), rounded to one decimal place.**

**➢ Duration of Disease: Using "months" as the unit, = (Informed Consent Date - First Diagnosis Date) / 30.4375, rounded to one decimal place.**

**➢ Progression-Free Survival / Overall Survival (months): Calculation formula: (Event Date (or Censoring Date) – Randomization Date + 1 day) / 30.4375, rounded to two decimal places.**

**➢ Duration of Response (months): Calculation formula: (Event Date (or Censoring Date) – Date First Assessed as CR or PR + 1 day) / 30.4375, rounded to two decimal places.**

**➢ Tumor Imaging Assessment Date: If the overall response assessment at a visit is PD, the earliest date among the assessment dates for target lesions, non-target lesions, and new lesions is taken. If the overall response assessment at a visit is not PD, the latest date among the assessment dates for target lesions, non-target lesions, and new lesions is taken.**

## 7.2 Study Populations

## 7.2.1 Subject Distribution

- Trial screening status, enrollment status, drug usage, and early termination: described by the number of cases.
- The distribution of participants across analysis sets: summarize the distribution of participants in each analysis population and the reasons for excluding participants from each analysis population.
- Description of subject enrollment, early withdrawal, and dataset distribution by study center.
- Detailed description of participants who withdrew early: including dose usage and reasons for early withdrawal.

## 7.2.2 Protocol Deviations

Summary and description of cases with protocol deviations.

## 7.2.3 Subject Characteristics Analysis

- **Age**: described using mean, standard deviation (SD), maximum, minimum, and median; categorized into ≤65 years and >65 years, with frequencies and proportions.
- **Sex and ethnicity**: frequencies and proportions.
- **Height, weight, and body mass index (BMI)**: described using mean, SD, maximum, minimum, and median.
- **Cancer history**:
  - Disease duration: described using mean, SD, maximum, minimum, and median.
  - Initial TNM stage, diagnostic method, pathological type, presence of metastatic lesions, and most recent TNM stage: frequencies and proportions.
- **EGFR gene mutation testing**: frequencies and proportions.
- **Personal history** (family history, allergy history, smoking, alcohol consumption): frequencies and proportions.
- **Other cancer history, cancer surgery history, prior chemotherapy, prior radiotherapy, and tumor treatment history** (other drugs/non-pharmacological therapies): frequencies and proportions.
- **Medical history/current illness/surgical history** (excluding tumors): frequencies and proportions.
- **Viral serology testing**: frequencies and proportions.
- **Baseline tumor imaging**:
  - **Presence of target lesions, target lesion sites, and presence of non-target lesions**: frequencies and proportions.
  - **Sum of lesion diameters**: described using mean, SD, maximum, minimum, and median.
- **Baseline ECOG score**: frequencies and proportions.
- **Baseline quality of life scores** (EORTC QLQ-C30/LC13 QOL questionnaire & LCSS): described using mean, SD, maximum, minimum, and median.

## 7.3 Efficacy Evaluation

## 7.3.1 Primary Efficacy Endpoint

- **BICR-Assessed Progression-Free Survival (PFS)**:
  - **Primary Analysis Method**:
    - Analyze the full analysis set (FAS).
    - Estimate median PFS and 95% CI for each group using the Kaplan-Meier method, with Kaplan-Meier curves plotted.
    - Compare groups using a stratified log-rank test, with stratification factors: gene mutation type (L858R mutation vs. Exon19del mutation) and presence of brain metastasis (no vs. yes).
    - Apply the Cox proportional hazards model, including gene mutation type and brain metastasis as covariates, to estimate the hazard ratio (HR) and 95% CI.
  - **Sensitivity Analysis 1**:
    - Analyze the FAS using a stratified Cox proportional hazards model to estimate the inter-group HR and 95% CI, with the same stratification factors.
  - **Sensitivity Analysis 2**:
    - Analyze the FAS using an unstratified log-rank test to calculate the *P*-value.
    - Apply an unstratified Cox proportional hazards model to estimate the HR and 95% CI.
  - **Sensitivity Analysis 3**:
    - Analyze the FAS. If disease progression or death occurs after two or more consecutive missing imaging assessments, treat the event as valid (ignore missing assessments). Use the same method as the primary analysis.
  - **Supplementary Analysis 1**:
    - Analyze the per-protocol set (PPS) using the same method as the primary analysis.
  - **Supplementary Analysis 2**:
    - Analyze the PPS excluding participants with randomization stratification errors (S19010, S30003, S31020, S40006, S61005) using the same method as the primary analysis.
  - **Supplementary Analysis 3**:
    - Analyze all randomized participants using the same method as the primary analysis.

## 7.3.2 Secondary Efficacy Endpoints

- **Investigator-Assessed PFS**:
  - Analyze the FAS using the same method as the primary analysis.
- **Overall Survival (OS)**:
  - Analyze the FAS using the same method as the primary analysis.
- **Objective Response Rate (ORR by Investigator and Independent Review**:
  - Analyze the FAS. Calculate ORR (CR + PR) as a percentage of total cases, with 95% CI computed using the Clopper-Pearson method.
  - Compare ORR between groups using a stratified Cochran-Mantel-Haenszel (CMH) test, with stratification factors: gene mutation type and brain metastasis.
  - Calculate the inter-group rate difference and 95% CI using the Mantel-Haenszel method.
- **Duration of Response (DOR)**:
  - Analyze the FAS using the same method as the primary analysis.
- **Depth of Response (DepOR)**:
  - Analyze the FAS using the percentage change from baseline in the sum of target lesion diameters at each post-treatment visit.
  - Compare tumor response depth (best percentage change in target lesion diameter sum relative to baseline) between groups using analysis of covariance (ANCOVA), with covariates: baseline value, gene mutation type, and brain metastasis.
  - Report unadjusted means, least squares (LS) means, inter-group difference, 95% CI for the difference, and *P*-value.

**• Disease Control Rate (DCR)**
Analyze the FAS. Calculate the disease control rate (DCR) as the proportion of cases achieving CR + PR + SD among total cases, with 95% CI computed using the Clopper-Pearson method. Compare DCR between groups using the stratified Cochran-Mantel-Haenszel (CMH) method, with stratification factors: gene mutation type (L858R mutation vs. Exon19del mutation) and status of brain metastasis (no vs. yes). Calculate the inter-group rate difference and its 95% CI using the Mantel-Haenszel method.

**• Intracranial Objective Response Rate (ORR)**
Analyze the subset of FAS with baseline intracranial target or non-target lesions. Calculate intracranial ORR (CR + PR) as a proportion of evaluable intracranial cases, with 95% CI computed using the Clopper-Pearson method. Compare ORR between groups using Fisher’s exact test. Calculate the inter-group rate difference and its 95% CI using the normal approximation method.

**• Intracranial Duration of Response (DOR)**
Analyze the subset of FAS with baseline intracranial target or non-target lesions. Estimate median DOR and 95% CI for each group using the Kaplan-Meier method, with Kaplan-Meier curves plotted. Compare groups using the log-rank test. Estimate the inter-group hazard ratio (HR) and 95% CI using the Cox proportional hazards model.

**• Intracranial Progression-Free Survival (PFS)**
Analyze the subset of FAS with baseline intracranial target or non-target lesions. Estimate median PFS and 95% CI for each group using the Kaplan-Meier method, with Kaplan-Meier curves plotted. Compare groups using the log-rank test. Estimate the inter-group HR and 95% CI using the Cox proportional hazards model.

**• Quality of Life Scores (EORTC QLQ-C30/LC13 QOL Questionnaire & LCSS)**
Analyze the FAS. Perform descriptive statistics on standardized results and changes from baseline for EORTC QLQ-C30, QLQ-LC13, and LCSS domains. Compare between groups using analysis of variance (ANOVA).

**Table 1: Censoring Rules for Survival Analysis (Endpoint Measures)**

| **Data Scenario** | **Censoring Date** |
| --- | --- |
| **Progression-Free Survival (PFS)** |  |
| No baseline tumor imaging assessment | Randomization date |
| No post-baseline tumor imaging assessment (no death within 91 days after first dose) | Randomization date |
| No disease progression or death during the trial | Last imaging assessment date |
| Disease progression/death occurring after two or more consecutive missing imaging assessments* | Last imaging assessment date prior to missing data |
| Treatment discontinuation due to undocumented progression | Last imaging assessment date |
| Treatment discontinuation due to toxicity or other reasons | Last imaging assessment date |
| New antitumor therapy initiated before progression/death | Last imaging assessment date prior to new therapy |
| **Duration of Response (DOR) (only participants achieving objective response** |  |
| No disease progression or death during the trial | Last imaging assessment date |
| Disease progression/death occurring after two or more consecutive missing imaging assessments* | Last imaging assessment date prior to missing data |
| Treatment discontinuation due to undocumented progression | Last imaging assessment date |
| Treatment discontinuation due to toxicity or other reasons | Last imaging assessment date |
| New antitumor therapy initiated before progression/death | Last imaging assessment date prior to new therapy |
| **Overall Survival (OS)** |  |
| No death recorded | Last known alive date |

Definition of two or more consecutive missing imaging assessments*:*

Per protocol, tumor assessments are performed every 6 weeks (±7 days) before Cycle 18 and every 9 weeks (±7 days) after Cycle 18 until progression or study withdrawal.

1. If two missing assessments occur in Cycles 1–18 and the interval between scheduled assessments exceeds (7×6)×2 + 2×7 = 98 days, they are considered consecutive missing assessments.
2. If two missing assessments include Cycles 18 and 21, and the interval exceeds 7×6 + 7 + 9×7 + 7 = 119 days, they are considered consecutive missing assessments.
3. If two missing assessments occur after Cycle 21, and the interval exceeds (7×9)×2 + 2×7 = 140 days, they are considered consecutive missing assessments.

## 7.4 Safety Evaluation

## 7.4.1 Drug Exposure and Dose Adjustments

Treatment duration, total dose administered, dose adjustments, and relative dose intensity will be summarized descriptively and presented in tables

- Treatment duration (days) = Last dose date – First dose date + 1.
- Total actual dose administered (mg) = Sum of daily doses recorded between first and last dose.
- Average daily dose (mg/day) = Total actual dose / Treatment duration.
- Relative dose intensity (% = (Total actual dose / Treatment duration) × Initial dose (mg) × 100%.

Summarize treatment duration, total dose, and relative dose intensity using mean, standard deviation (SD), maximum, minimum, and median. Summarize dose adjustments during the study by frequency and percentage.

Describe drug exposure based on the safety analysis set (SAS).

## 7.4.2 Adverse Events

Adverse event (AE) data during the treatment period will be coded using the current version of MedDRA at the time of coding and processed in statistical analyses.

The incidence of the following will be summarized: adverse events (AEs), adverse drug reactions (ADRs), AEs leading to treatment interruption, dose reduction, treatment discontinuation, fatal AEs, and serious adverse events (SAEs) during the treatment period. For incidence calculations, each subject will be counted only once per AE category. If the same AE occurs more than once in the same subject, it will be counted as a single case in incidence statistics.

AEs will be summarized in frequency tables by System Organ Class (SOC) and Preferred Term (PT). Incidence (count of participants with ≥1 occurrence of a specific AE will be calculated for each SOC and PT).
For AE/ADR severity: If a subject experiences the same AE multiple times, the most severe occurrence will be used for severity analysis.

Summarized categories include:

➢ Treatment-emergent adverse events (TEAEs)
➢ Treatment-emergent adverse drug reactions (ADRs)
➢ AEs leading to treatment interruption, dose reduction, or discontinuation
➢ ADRs leading to treatment interruption, dose reduction, or discontinuation
➢ AEs leading to death
➢ ADRs leading to death
➢ Serious adverse events (SAEs) during treatment
➢ Serious adverse drug reactions (SADRs) during treatment
➢ CTCAE Grade ≥3 AEs during treatment
➢ CTCAE Grade ≥3 ADRs during treatment
➢ Number of cases, event counts, and incidence rates of TEAEs, categorized by System Organ Class (SOC) and Preferred Term (PT) (descending order)
➢ Number of cases, event counts, and incidence rates of ADRs, categorized by SOC and PT (descending order)
➢ Number of cases, event counts, and incidence rates of AEs leading to treatment interruption, dose reduction, or discontinuation, categorized by SOC and PT (descending order)
➢ Number of cases, event counts, and incidence rates of ADRs leading to treatment interruption, dose reduction, or discontinuation, categorized by SOC and PT (descending order)
➢ Number of cases, event counts, and incidence rates of AEs leading to death, categorized by SOC and PT (descending order)
➢ Number of cases, event counts, and incidence rates of ADRs leading to death, categorized by SOC and PT (descending order)
➢ Number of cases, event counts, and incidence rates of SAEs, categorized by SOC and PT (descending order)
➢ Number of cases, event counts, and incidence rates of SADRs, categorized by SOC and PT (descending order)
➢ AEs with incidence ≥5% during treatment, categorized by PT (descending order)
➢ ADRs with incidence ≥5% during treatment, categorized by PT (descending order)
➢ AEs with incidence ≥10% during treatment, categorized by PT (descending order)
➢ ADRs with incidence ≥10% during treatment, categorized by PT (descending order)
Provide a listing of cases with AEs and SAEs.

## 7.4.3 Vital Signs

Descriptive statistics (mean ± standard deviation, maximum, minimum, and median) will be used to summarize the measurements and changes from baseline at each time point. Data will be presented by category according to the specified classification list below.

## 7.4.4 Laboratory Parameters

- Blood routine, biochemistry, coagulation: Describe pre- and post-treatment measurements and changes using mean ± SD, maximum, minimum, and median. Use cross-tabulation to summarize normal/abnormal changes pre- and post-treatment. Report the proportion of participants with "abnormal and clinically significant" findings among those with abnormal results, as judged by investigators.
- Urinalysis: Use cross-tabulation to summarize normal/abnormal changes pre- and post-treatment. Report the proportion of participants with "abnormal and clinically significant" findings among those with abnormal results, as judged by investigators.

## 7.4.5 Electrocardiogram (ECG)

Heart rate (HR), PR interval, RR interval, QRS duration, QT interval, and QTcF will be summarized using descriptive statistics (mean ± standard deviation, maximum, minimum, median) for measurements and changes from baseline. Shifts from baseline (normal/abnormal) will be presented using cross-tabulations. The proportion of participants with abnormal values categorized as "abnormal and clinically significant" will be described; clinical significance will be determined by the investigator.

## 7.4.6 Echocardiogram

Left Ventricular Ejection Fraction (LVEF) will be summarized using descriptive statistics (mean ± standard deviation, maximum, minimum, median) for measurements and changes from baseline. Shifts from baseline (normal/abnormal) will be presented using cross-tabulations. The proportion of participants with abnormal values categorized as "abnormal and clinically significant" will be described; clinical significance will be determined by the investigator.

## 7.4.7 Physical Examination

Shifts from baseline (normal/abnormal) will be presented. The proportion of participants with abnormal findings categorized as "abnormal and clinically significant" will be described; clinical significance will be determined by the investigator.

## 7.4.8 Body Weight

Body weight will be summarized using descriptive statistics (mean ± standard deviation, maximum, minimum, median) for measurements and changes from baseline.

## 7.4.9 Concomitant Medications

- **Prior doses**: Includes doses ended before the first dose of the study drug and doses started before the first dose and continued afterward.
- **Concomitant doses**: Includes:
  λ Doses started before the first dose and continued afterward.
  λ Doses started after the first dose.
  Concomitant doses will be coded using WHOGLOBAL_20240301_zh-CN. Summarize prior and concomitant doses by therapeutic class (ATC2), chemical class (ATC4), and preferred drug name.

## 7.5 Interim Analysis

None.

## 7.6 Subgroup Analysis

➢ Efficacy: Subgroup analyses for the primary efficacy endpoint will be conducted based on the following factors, with forest plots for hazard ratios (HRs):
• Mutation type (L858R mutation vs. Exon19del mutation)
• Presence of brain metastasis (No vs. Yes)
• Gender (Male vs. Female)

• Age (≤65 years vs. >65 years)
• ECOG performance status (0 vs. 1)
• Smoking history (Yes vs. No)

## 7.7 Other Analyses

None.

## 8. Statistical Analysis Software

Statistical analyses will be performed using SAS® 9.4 software.

## 9. References

➢ National Medical Products Administration (NMPA). Drug Registration Management Measures. July 2020. (in Chinese)
➢ National Medical Products Administration (NMPA). Good Clinical Practice for Drug Clinical Trials. July 2020. (in Chinese)
➢ International Council for Harmonisation (ICH). E9: Statistical Principles for Clinical Trials.
➢ International Council for Harmonisation (ICH). E9(R1) Addendum: Estimands and Sensitivity Analysis in Clinical Trials to the Guideline on Statistical Principles for Clinical Trials.
➢ International Council for Harmonisation (ICH). E3: Structure and Content of Clinical Study Reports.
➢ China Food and Drug Administration (CFDA). Guidelines for Biostatistics in Drug Clinical Trials. June 2016. (in Chinese)
➢ National Medical Products Administration (NMPA). Guidelines for Data Management and Statistical Analysis Plans in Drug Clinical Trials. December 2021. (in Chinese)

## 10. Appendices
