# Supplementary material
Source: Research Square preprint supplement (doi:10.21203/rs.3.rs-10115031/v1)
Supplement: Supplementary file 3 [file e2fe9736be5fc3733038b4aa.docx]

A Randomized, Open-Label, Active-Controlled, Multicenter Phase III Clinical Trial to Evaluate the Efficacy and Safety of FHND9041 Versus Afatinib as a First-Line Treatment for Patients with EGFR mutation-positive (EGFRm+) Locally Advanced or Metastatic Non-Small Cell Lung Cancer (NSCLC)

| Protocol Number: | FHND9041-III-01 |
| --- | --- |
| Principal Investigator: | Yuankai Shi |
| Version Number: | V1.0 |
| Version Date: | May 25, 2021 |
| Sponsor: | Nanjing Chuangte Pharmaceutical Technology Co., Ltd. |
| Clinical Trial Unit: | Cancer Hospital, Chinese Academy of Medical Sciences |
| Data Statistics Unit: | Department of Biostatistics, School of Public Health, Nanjing Medical University |
| Contract Research Organization (CRO): | Beijing Huashikangyuan Pharmaceutical Technology Co., Ltd. |

This protocol contains confidential information of Nanjing Chuangte Pharmaceutical Technology Co., Ltd. Any individual who obtains or reviews this document is prohibited from reproducing, disclosing, or using it for unauthorized purposes without prior written consent from Nanjing Chuangte Pharmaceutical Technology Co., Ltd. In the event of any suspected or actual breach of the above provisions, please immediately notify Nanjing Chuangte Pharmaceutical Technology Co., Ltd.

## Protocol Signature Page

#### 1. Sponsor

I will diligently fulfill the responsibilities of the sponsor in accordance with Good Clinical Practice (GCP) and all applicable regulations. I am responsible for initiating, applying for, organizing, and funding this clinical trial. I will cover medical expenses and provide appropriate financial compensation for subjects who suffer trial-related injuries or death during the trial. I will provide legal guarantees to the investigators. I agree to conduct this clinical trial in accordance with the design and provisions of this protocol (Protocol Number: FHND9041-III-01; Version: V1.0; Version Date: May 25, 2021).

Sponsor: Nanjing Chuangte Pharmaceutical Technology Co., Ltd.
Sponsor Representative: 
Signature: ______________________
Date: ______________________

#### 2. Principal Investigator

I will diligently fulfill the responsibilities of the investigator in accordance with Chinese GCP regulations, either by personally participating in or directly supervising this clinical study. I have read and confirmed this protocol (Protocol Number: FHND9041-III-01; Version: V1.0; Version Date: May 25, 2021). I agree to fulfill the relevant responsibilities in accordance with Chinese laws, the Declaration of Helsinki, Chinese GCP, and this study protocol. I will only modify the protocol after notifying the sponsor and obtaining approval from the ethics committee, unless immediate measures are necessary to protect the safety, rights, and interests of the subjects.

Research Center Name: Cancer Hospital, Chinese Academy of Medical Sciences
Principal Investigator: Yuankai Shi
Signature: ______________________
Date: ______________________

#### 3. Sub-Center Principal Investigator

I will diligently fulfill the responsibilities of the investigator in accordance with Chinese GCP regulations, either by personally participating in or directly supervising this clinical study. I have read and confirmed this protocol (Protocol Number: FHND9041-III-01; Version: V1.0; Version Date: May 25, 2021). I agree to fulfill the relevant responsibilities in accordance with Chinese laws, the Declaration of Helsinki, Chinese GCP, and this study protocol. I will only modify the protocol after notifying the sponsor and obtaining approval from the ethics committee, unless immediate measures are necessary to protect the safety, rights, and interests of the subjects.

Research Center Name:
Principal Investigator:
Signature: ______________________
Date: ______________________

#### 4. Statistical Analysis Unit

I have read and confirmed this protocol (Protocol Number: FHND9041-III-01; Version: V1.0; Version Date: May 25, 2021). I agree to the content of the trial protocol and will strictly adhere to this protocol, the "Good Clinical Practice for Drugs," and the "Guidelines for Biostatistics in Drug Clinical Trials" to diligently fulfill the responsibilities of the statistical personnel.

Statistical Analysis Unit Name: Department of Biostatistics, School of Public Health, Nanjing Medical University
Statistical Lead: Hao Yu
Signature: ______________________
Date: ______________________

#### 5. Contract Research Organization (CRO)

I will diligently fulfill the responsibilities of the contract research organization in accordance with Chinese GCP regulations. I have read and confirmed this protocol (Protocol Number: FHND9041-III-01; Version: V1.0; Version Date: May 25, 2021). I agree to fulfill the relevant responsibilities in accordance with Chinese laws, the Declaration of Helsinki, Chinese GCP, and this study protocol. Within the scope of the sponsor’s authorization, I will strictly conduct this clinical trial in accordance with the design and provisions of this protocol (Protocol Number: FHND9041-III-01; Version: V1.0; Version Date: May 25, 2021).

CRO Name: Beijing Huashi Kangyuan Pharmaceutical Technology Co., Ltd.
Project Lead: Mengmeng Yan
Signature: ______________________
Date: ______________________

**Table of Contents**

[Protocol Signature Page 2](#_Toc198652494)

[Compliance Statement 11](#_Toc198652495)

[Protocol Synopsis 12](#_Toc198652496)

[List of Abbreviations 24](#_Toc198652497)

[1 Research Background 25](#_Toc198652498)

[1.1 Disease Background 26](#_Toc198652499)

[1.2 Clinical Advancements in EGFR Inhibitors 26](#_Toc198652500)

[1.3 Study Drug 27](#_Toc198652501)

[1.3.1 Drug Name 27](#_Toc198652502)

[1.3.2 Chemical Structure, Molecular Formula, and Molecular Weight 27](#_Toc198652503)

[1.3.3 Dosage Form and Specification 28](#_Toc198652504)

[1.3.4 Indications 28](#_Toc198652505)

[2 Preclinical Studies 28](#_Toc198652506)

[2.1 Summary of Pharmacodynamic Studies 28](#_Toc198652507)

[2.1.1](#_Toc198652508) *[In Vitro](#_Toc198652508)* [Pharmacodynamic Studies 28](#_Toc198652508)

[2.1.2](#_Toc198652509) *[In Vivo](#_Toc198652509)* [Pharmacodynamics Studies 30](#_Toc198652509)

[2.2 Summary of Toxicological Research 30](#_Toc198652510)

[2.2.1 Safety Pharmacology Research 30](#_Toc198652511)

[2.2.2 Single-Dose Toxicity Studies 30](#_Toc198652512)

[2.2.3 Repeated-Dose Toxicity Studies 30](#_Toc198652513)

[2.2.4 Genotoxicity Studies 31](#_Toc198652514)

[2.3 Summary of Pharmacokinetic Studies 31](#_Toc198652515)

[2.3.1 Absorption of FHND9041 31](#_Toc198652516)

[2.3.2 Distribution of FHND9041 34](#_Toc198652517)

[2.3.3 Metabolism of FHND9041 35](#_Toc198652518)

[2.3.4 Excretion of FHND9041 36](#_Toc198652519)

[2.3.5 Drug-drug Interactions 36](#_Toc198652520)

[2.4 Summary of Clinical Effectiveness Studies 36](#_Toc198652521)

[2.4.1 Pharmacokinetic Results 37](#_Toc198652522)

[2.4.2 Efficacy Results 38](#_Toc198652523)

[2.5 Clinical Safety Summary 39](#_Toc198652524)

[3 Study Objective 39](#_Toc198652525)

[3.1 Primary Objective 39](#_Toc198652526)

[3.2 Secondary Objective 39](#_Toc198652527)

[4 Study Design 40](#_Toc198652528)

[5 Study Population 40](#_Toc198652529)

[5.1 Subject Numbering Rules 40](#_Toc198652530)

[5.2 Inclusion Criteria 41](#_Toc198652531)

[5.3 Exclusion Criteria 41](#_Toc198652532)

[5.4 Randomization 43](#_Toc198652533)

[5.5 Subject Withdrawal and Treatment Termination Criteria 43](#_Toc198652534)

[6. Study Visit 43](#_Toc198652535)

[6.1 Visit Process 43](#_Toc198652536)

[6.1.1 Screening Visit 43](#_Toc198652537)

[6.1.2 Treatment Period Visit 44](#_Toc198652538)

[6.1.3 Follow-up Period 45](#_Toc198652539)

[6.1.4 Unscheduled Visits 46](#_Toc198652540)

[6.2 Efficacy Evaluation 46](#_Toc198652541)

[6.2.1 Imaging Evaluation 46](#_Toc198652542)

[6.2.2 Independent Imaging Evaluation 47](#_Toc198652543)

[6.2.3 Quality of Life Assessment 47](#_Toc198652544)

[6.3 Safety Evaluation 47](#_Toc198652545)

[6.3.1 Vital Signs 47](#_Toc198652546)

[6.3.2 Physical Examination 47](#_Toc198652547)

[6.3.3 ECOG Performance Status 47](#_Toc198652548)

[6.3.4 Laboratory Tests 47](#_Toc198652549)

[6.3.5 ECG Examination 48](#_Toc198652550)

[6.4 Population Pharmacokinetic (PPK) Study 48](#_Toc198652551)

[7. Investigational Drug 48](#_Toc198652552)

[7.1 Overview of Investigational Drug 48](#_Toc198652553)

[7.2 Dosage Regimen 49](#_Toc198652554)

[7.3 Medication Compliance 49](#_Toc198652555)

[7.4 Handling of Missed Dose 49](#_Toc198652556)

[7.5 Packaging and Labeling 50](#_Toc198652557)

[7.6 Preparation/Handling/Storage/Responsibilities 50](#_Toc198652558)

[7.6.1 Drug Delivery and Receipt 50](#_Toc198652559)

[7.6.2 Drug Dispensing, Inventory, and Recovery 51](#_Toc198652560)

[7.7 Concomitant Medications 51](#_Toc198652561)

[8 Dose Adjustment Guidelines 52](#_Toc198652562)

[9 Clinical Assessments 53](#_Toc198652563)

[9.1 Efficacy Evaluation Endpoints 53](#_Toc198652564)

[9.1.1 Primary Efficacy Endpoints 53](#_Toc198652565)

[9.1.2 Secondary Efficacy Endpoints 53](#_Toc198652566)

[9.2 Safety Evaluation Endpoints 54](#_Toc198652567)

[10 Adverse Events 54](#_Toc198652569)

[10.1 Definition of Adverse Events 54](#_Toc198652570)

[10.2 Definition of Serious Adverse Events 54](#_Toc198652571)

[10.3 Tumor Progression 54](#_Toc198652572)

[10.4 Criteria for Assessing Severity of AE 55](#_Toc198652573)

[10.5 Criteria for Assessing the RelationshipBetween AEs and Investigational Drug 55](#_Toc198652574)

[10.6 Recording of Adverse Events (AEs) 56](#_Toc198652575)

[10.7 Management and Follow-up of AEs 56](#_Toc198652576)

[10.8 Reporting and Management of SAE 57](#_Toc198652577)

[10.9 Pregnancy Events 57](#_Toc198652578)

[11 Data Management 58](#_Toc198652579)

[11.1 Data Management Workflow Diagram 58](#_Toc198652580)

[11.2 Roles and Responsibilities in Data Collection 58](#_Toc198652581)

[11.3 Database Design and Establishment 58](#_Toc198652582)

[11.4 Data Entry 59](#_Toc198652583)

[11.5 Source Data Verification 59](#_Toc198652584)

[11.6 Data Validation 59](#_Toc198652585)

[11.7 Medical Coding 59](#_Toc198652586)

[11.8 Data Quality Response 59](#_Toc198652587)

[11.9 Data Lock and Unlock 59](#_Toc198652588)

[11.10 External Data Management 59](#_Toc198652589)

[11.11 eCRF Archive 60](#_Toc198652590)

[12 Statistical Analysis 60](#_Toc198652591)

[12.1 Determination of Sample size 60](#_Toc198652592)

[12.2 Statistical Analysis Plan 60](#_Toc198652593)

[12.3 Statistical Analysis Data Sets 60](#_Toc198652594)

[12.4 Statistical Analysis Methods 60](#_Toc198652595)

[12.4.1 General Principles 61](#_Toc198652596)

[12.4.2 Demographic Baseline and Treatment Analysis 61](#_Toc198652597)

[12.4.3 Handling of Missing Data 61](#_Toc198652598)

[12.4.4 Efficacy Analysis 61](#_Toc198652599)

[12.4.4.1 Primary Efficacy Endpoints 61](#_Toc198652600)

[12.4.4.2 Secondary Efficacy Endpoints 62](#_Toc198652601)

[12.4.5 Safety Analysis 63](#_Toc198652602)

[12.4.6 Population Pharmacokinetics (PPK) Analysis 63](#_Toc198652603)

[13 Quality Control and Assurance 63](#_Toc198652604)

[14 Study Management 64](#_Toc198652605)

[14.1 Protocol Amendments 64](#_Toc198652606)

[14.2 Protocol Deviations 64](#_Toc198652607)

[14.3 Study Termination . 64](#_Toc198652608)

[14.4 Retention of Study Records 64](#_Toc198652609)

[15. Ethical Regulations 65](#_Toc198652610)

[15.1 Institutional Review Board (IRB)/Independent Ethics Committee (IEC) 65](#_Toc198652611)

[15.2 Ethical Conduct in the Study 65](#_Toc198652612)

[15.3 Subject Information and Informed Consent 65](#_Toc198652613)

[16 Sponsor’s Criteria for Terminating a Study 66](#_Toc198652614)

[17 Investigator Publications 66](#_Toc198652615)

[18 References 66](#_Toc198652616)

[Appendix 1: ECOG Performance Status Scale 68](#_Toc198652617)

[Appendix 2: RECIST 1.1 Tumor Response Evaluation Criteria 68](#_Toc198652618)

[Appendix 3: Improved RANO evaluation criteria 72](#_Toc198652619)

[Appendix 4：EORTC C30/LC13 QOL Questionnaire &LCSS 73](#_Toc198652620)

## Compliance Statement

1. Regulatory Compliance
   The study design adheres to the following documents:
   - National Medical Products Administration (NMPA) clinical trial approval numbers: 2018L02901, 2018L02902.
   - *Drug Administration Law of the People’s Republic of China (2019 Edition).*
   - *Drug Registration Regulations (2020 Edition).*
   - Good Clinical Practice (GCP) Guidelines (2020 Edition).
   - Declaration of Helsinki (2013 Edition).
   - Technical Guidelines for Clinical Trials of Antineoplastic Drugs (2012 Edition).
2. Institutional Review Board (IRB)/Independent Ethics Committee (IEC)
   Before the trial begins, the investigator is responsible for obtaining approval from the IRB, IEC, or an equivalent organization for the clinical study protocol, informed consent form, and other relevant documents (e.g., subject recruitment advertisements). All communications with the ethics committee must be retained in the investigator’s file.
3. Informed Consent
   The informed consent form must comply with GCP, ICH-GCP, and relevant laws and regulations.
   The informed consent form used in this study, as well as any changes made during the study, must be approved by the ethics committee and the sponsor before use.
   Before any trial-related activities, the benefits and risks of the trial must be fully explained to potential subjects. After explaining the basic content of the trial and ensuring that each subject understands the purpose of the trial, the subject must sign and date the informed consent form.

## Protocol Synopsis

| Study Drug | FHND9041 capsule |
| --- | --- |
| Study Title | A Randomized, Open-Label, Active-Controlled, Multicenter Phase III Clinical Trial to Evaluate the Efficacy and Safety of FHND9041 Versus Afatinib as a First-Line Treatment for Patients with EGFR mutation-positive (EGFRm+) Locally Advanced or Metastatic Non-Small Cell Lung Cancer (NSCLC) |
| Protocol Number | FHND9041-III-01 |
| version Number | V1.0 |
| version Date | May 25, 2021 |
| Sponsor | Jiangsu Chuangte Pharmaceutical Technology Co., Ltd. |
| Study Objective | **Primary objectives:**  To evaluate the efficacy of FHND9041 compared to Afatinib as first-line treatment for EGFR mutation-positive (EGFRm+) locally advanced or metastatic non-small cell lung cancer (NSCLC). The primary endpoint is progression-free survival (PFS) as assessed by Blinded Independent Central Review (BICR).  **Secondary objectives:**  To evaluate other efficacy endpoints of FHND9041 compared to Afatinib as first-line treatment for EGFRm+ locally advanced or metastatic NSCLC, including:   - Investigator-assessed PFS - Objective response rate (ORR) - Overall survival (OS) - Duration of response (DoR) - Disease control rate (DCR) - Depth of response (DepOR) - Intracranial ORR and DoR - Quality of life (QOL) as measured by the EQ-5D, C30/LC13 QOL questionnaires, and LCSS.   To assess the safety of FHND9041 compared to Afatinib as first-line treatment for EGFRm+ locally advanced or metastatic NSCLC.  To conduct population pharmacokinetic studies of FHND9041 capsules. |
| Study Design | This is a randomized, open-label, active-controlled, multicenter phase III clinical trial aimed at evaluating the efficacy and safety of FHND9041 compared to Afatinib as first-line treatment for locally advanced or metastatic EGFR mutation-positive (EGFRm+) non-small cell lung cancer (NSCLC). The primary efficacy endpoint is progression-free survival (PFS), along with other efficacy indicators and a population pharmacokinetics study.  The study will recruit EGFR mutation-positive patients (including L858R and/or Exon 19 deletion) who have not received prior treatment for their disease. Eligible subjects will receive the investigational drug until disease progression is confirmed as defined by RECIST 1.1 criteria, intolerable drug-related toxicities, or other pre-specified treatment termination criteria.  Eligible subjects will be randomized in a 1:1 ratio to either the experimental group or the control group (FHND9041 group: Afatinib group). The FHND9041 group will receive an oral dose of 80 mg once daily, while the Afatinib group will receive an oral dose of 40 mg once daily.  The study consists of three phases: 1. Screening period; 2. Treatment period; 3. Follow-up period. Subjects who provide informed consent and meet the screening criteria will be randomized via a central randomization system to either the experimental or control group and will undergo treatment and evaluation per the study protocol.  Subjects in the experimental group (FHND9041 group) will participate in a population pharmacokinetic (PPK) study. Blood samples (4 mL) will be collected for PPK analysis at the following time points: within 1 hour prior to the first dose, on Day 21 of Cycle 1 (C1D21, window period ±3 days), Day 21 of Cycle 2 (C2D21, window period ±3 days), Day 21 of Cycle 4 (C4D21, window period ±3 days), and on the day of treatment discontinuation.  Subjects will continue treatment until disease progression as defined by RECIST 1.1, intolerable drug-related toxicity, or meeting other predefined treatment termination criteria. Tumor imaging assessments by Blinded Independent Central Review (BICR) will follow RECIST 1.1 criteria (intracranial efficacy will be evaluated using RANO-BM criteria), while investigators will conduct tumor assessments per RECIST 1.1. Evaluations will be performed every 6 weeks (±7 days) for the first 18 cycles and every 9 weeks (±7 days) thereafter until disease progression or subject withdrawal. After disease progression is confirmed, survival follow-up will be conducted every 3 months (±7 days). |
| Study Population | EGFRm+ locally advanced or metastatic NSCLC |
| Sample Size | This is a randomized, open-label, positive-drug parallel-control, multicenter, superiority-designed Phase III clinical study. The hazard ratio (HR) for progression-free survival (PFS) of FHND9041 compared to Afatinib is hypothesized to be 0.71 (with median PFS of 11 months in the Afatinib group and 15.5 months in the FHND9041 group). The enrollment ratio is set at a 1:1 ratio for the experimental group and the control group. The enrollment period is 12 months, and the study duration is 36 months, with a one-sided alpha of 0.025 and 80% power. A total of 268 events will be required to detect statistical differences in PFS between groups (sample size calculation performed using the log-rank test in PASS software). With an estimated 10% loss to follow-up, approximately 350 patients will need to be enrolled (175 in the experimental group and 175 in the control group). |
| Inclusion Criteria | 1. Age ≥18 years, regardless of gender; 2. Histologically or cytologically confirmed locally advanced or metastatic non-small cell lung cancer (NSCLC) (including patients with recurrence after prior surgical treatment or newly diagnosed stage IIIb, IIIc, or IV disease, staged per the AJCC 8th edition criteria); 3. No prior systemic antitumor therapy (e.g., standard chemotherapy, targeted therapy, biologic therapy, or immunotherapy; exceptions include localized treatment for non-target lesions). Patients who received adjuvant or neoadjuvant therapy (chemotherapy, radiotherapy, or other treatments) may enroll if disease progression occurred ≥6 months after completion of treatment; 4. Confirmation by a central laboratory report of tumor tissue harboring one of the two common EGFR-positive mutations sensitive to EGFR-TKI therapy: exon 19 deletion or L858R; 5. At least one measurable tumor lesion at baseline meeting the following criteria: ① Not previously irradiated or used for screening biopsy (if the subject has only one measurable lesion, baseline imaging must be performed ≥7 days after biopsy); ② Accurately measurable with the longest diameter ≥10 mm (short axis ≥15 mm for lymph nodes); ③ Detectable by CT or MRI, with consistent imaging modality used for subsequent evaluations; 6. ECOG performance status of 0–1 (Eastern Cooperative Oncology Group); 7. Life expectancy ≥3 months; 8. Negative serum pregnancy test for all women of childbearing potential. Male and female subjects of reproductive potential must agree to remain abstinent or use highly effective contraception throughout the study and for at least 3 months after the last dose of the investigational drug; 9. Subjects must demonstrate adequate comprehension of the study’s purpose and procedures, commit to protocol compliance and follow-up visits, voluntarily participate, and sign a written informed consent form. |
| Exclusion Criteria | 1. Received any of the following prior treatments: ① Major surgery within 28 days before the first dose of the investigational drug (major surgery refers to Grade 3 and 4 procedures as defined by the *Clinical Application Management of Medical Technologies* implemented on May 1, 2009); ② Radiation therapy involving ≥30% of the bone marrow area or extensive radiotherapy within 28 days before the first dose of the investigational drug; ③ Local radiotherapy or palliative radiotherapy for bone metastases within 14 days before the first dose of the investigational drug; ④ Use of potent CYP3A4 inhibitors or inducers within 7 days before the first dose, or subjects requiring continued use of these drugs during the study; ⑤ Use of Chinese herbal medicines or proprietary Chinese medicinal products with antitumor indications within 7 days before the first dose, or subjects requiring continued use of these drugs during the study; ⑥ Ongoing treatment with drugs known to prolong QTc intervals or potentially induce torsades de pointes ventricular tachycardia, which must be continued during the study; 2. Presence of unresolved ≥Grade 2 toxicities (per NCI-CTCAE v5.0 criteria) related to prior therapies at the start of study treatment (excluding alopecia and Grade 2 neuropathy caused by platinum-based drugs); 3. Subjects with spinal cord compression or brain metastases (excluding those who are asymptomatic, stable, and have not required steroid treatment for at least 4 weeks prior to study treatment; subjects who received local radiotherapy for brain metastases must have stable symptoms for ≥28 days post-radiotherapy to enroll); 4. Clinical evidence of severe or uncontrolled systemic diseases (e.g., uncontrolled hypertension despite medication, active bleeding disorders) deemed by the investigator to render the subject unsuitable for the trial or to compromise protocol compliance; 5. Active infections requiring medication, such as HBV (HBsAg-positive with HBV-DNA >1000 copies/ml or 200 IU/ml and AST/ALT >2.0×ULN), HCV (HCV antibody-positive with HCV-RNA ≥1000 IU/mL), HIV, or syphilis; 6. Clinically significant gastrointestinal dysfunction affecting drug intake, transport, or absorption, including: inability to take oral medication, uncontrolled nausea/vomiting, extensive gastrointestinal resection, unresolved recurrent diarrhea, chronic gastric conditions requiring proton pump inhibitors (PPIs), Crohn’s disease, or ulcerative colitis; 7. Any of the following cardiac criteria: ① Mean QTcF interval >450 ms (male) or >470 ms (female) based on triplicate resting ECGs; ② Clinically significant arrhythmias, conduction abnormalities, or ECG abnormalities (e.g., complete left bundle branch block, third-degree AV block, type II second-degree AV block, PR interval >250 ms, myocardial infarction within 6 months); ③ Risk factors for QTc prolongation or arrhythmias (e.g., heart failure, moderate/severe hypokalemia, congenital long QT syndrome, family history of long QT syndrome, sudden unexplained death in first-degree relatives aged <40 years, concomitant QTc-prolonging drugs); ④ Left ventricular ejection fraction (LVEF) ≤50%; 8. History of interstitial lung disease (ILD), drug-induced ILD, steroid-requiring radiation pneumonitis, or clinically active ILD; 9. Inadequate bone marrow reserve or organ function, meeting any laboratory criteria below (without transfusion, blood products, G-CSF, or hematopoietic stimulants within 2 weeks prior to screening): ① Absolute neutrophil count <1.5×10⁹/L; ② Platelet count <90×10⁹/L; ③ Hemoglobin <90 g/L; ④ ALT/AST >2.5×ULN (>5×ULN if liver metastases present); ⑤ Total bilirubin >1.5×ULN (>3×ULN for Gilbert’s syndrome or liver metastases); ⑥ Creatinine >1.5×ULN with creatinine clearance <50 mL/min (measured or calculated via Cockcroft–Gault formula; required only if creatinine >1.5×ULN); 10. History of hypersensitivity to the investigational drug’s active/inactive components, structurally similar drugs, or drugs of the same class; 11. Pregnant or lactating women; 12. Concurrent malignancy or history of other malignancies within 5 years (excluding cured cervical carcinoma in situ, basal/squamous cell skin cancer, or papillary thyroid carcinoma); 13. Severe or uncontrolled ocular conditions judged by the investigator to increase safety risks; 14. Investigator-determined unsuitability for the study. |
| Dosage Regimen | **FHND9041 Capsules:** 80 mg per capsule, administered orally once daily, 80 mg per dose, continuously in 21-day treatment cycles until disease progression or the occurrence of intolerable adverse events. Dose reduction to 40 mg/day may be permitted based on clinical judgment.  **Afatinib Tablets:** 40 mg per tablet, administered orally once daily, 40 mg per dose, continuously in 21-day treatment cycles until disease progression or intolerable adverse events occur. Dose reduction to 30 mg/day may be permitted based on clinical judgment. |
| Efficacy Evaluation | **Primary Endpoint:** Progression-Free Survival (PFS) assessed by blinded independent central imaging review (BICR) according to RECIST v1.1 criteria (Intracranial efficacy will be evaluated according to the RANO-BM criteria).  **Secondary Endpoints:**   - Investigator-assessed PFS; - Objective Response Rate (ORR); - Overall Survival (OS); - Duration of Response (DoR); - Disease Control Rate (DCR); - Depth of Response (DepOR); - Intracranial ORR and DoR; - Quality of Life (QoL) scores (assessed by EQ-5D-3L, EORTC QLQ C30/LC13 QOL and LCSS questionnaires); - Population Pharmacokinetic (PK). |
| Safety Evaluation | Safety will be assessed using the CTCAE v5.0 criteria, including physical examinations, ECOG performance status, laboratory tests, ECG, echocardiography, and ophthalmologic assessments. Subjects will be closely monitored for symptoms and signs following drug administration during the study. All adverse events occurring during the clinical study, including abnormal clinical symptoms or vital signs and laboratory findings. Adverse events will be documented with respect to their clinical manifestations, severity, onset time, resolution time, duration, management measures, outcomes, and relationship to the investigational product. |
| Statistical Analysis | **Analysis Sets** This study will include the following analysis sets:   - **Full Analysis Set (FAS):** Based on the intention-to-treat (ITT) principle, the FAS will include all randomized subjects and will serve as the primary analysis set for drug efficacy analysis. - **Per-Protocol Set (PPS):** Subjects from the FAS without significant protocol deviations. No imputation will be performed for missing data. This will serve as a supplementary analysis set for drug efficacy analysis. - **Safety Analysis Set (SAS):** All enrolled subjects who have received at least one dose of the investigational drug and have safety data post-dosing will be included in the SAS. This set will be used for safety analysis. - **Pharmacokinetic Analysis Set (PAS):** All subjects who participated in PK blood sampling, received at least one dose of the investigational drug, and have at least one evaluable PK sample will be included in the PAS. This set will be used for PK analysis.   **General Analysis** Descriptive statistics will be applied based on the data type. For continuous data, the following statistics will be reported: sample size (N), mean, standard deviation (SD), median, minimum, and maximum. For categorical and ordinal data, frequency and percentage will be used. Time-to-event data will be analyzed using the Kaplan-Meier method to estimate median times and corresponding 95% confidence intervals (CIs).  **Efficacy Analysis** A stratified log-rank test will be used to compare the primary efficacy endpoint (PFS) between treatment groups as assessed by BICR. Additionally, a Cox proportional hazards model, adjusted for stratified factors, will be used to estimate the treatment hazard ratio (HR) and corresponding 95% confidence intervals. Stratification factors will be consistent with those used for randomization. The final analysis will occur once 268 PFS events have been reached. Statistical testing for the primary endpoint (PFS) will be conducted at a one-sided significance level of 0.025. If the primary endpoint (PFS) shows significant differences, further analysis of the key secondary endpoints (OS and ORR) will be performed. OS will be analyzed using the same methodology as PFS, while the Cochran-Mantel-Haenszel (CMH) method will be used to compare ORR between treatment groups. Other secondary endpoints, including DoR, intracranial ORR and DoR, and time to CNS progression, will be analyzed similarly to ORR or PFS. |
| Study Completion | The study will be completed once either 80% of OS endpoint events are reached or 24 months have passed since the last patient enrollment (whichever occurs first). At the end of the clinical trial, subjects who have not progressed (PD), as determined by the investigator, and who are deemed to benefit from the study drug, may continue to receive treatment at no cost, with continued collection of safety and efficacy data, although no further study assessments will be scheduled. |
| Study Timeline | The estimated timeline for the study is from July 2021 to June 2024. |

|  | **Table 1- 1 Research flow chart** | | | | | |  |
| --- | --- | --- | --- | --- | --- | --- | --- |
| **Study Procedure1** | **Screening Period** | **Cycle 1** | **Cycle 2** | **Cycle 3-18 (Follow-up every 6 weeks)** | **Post Cycle 18 (Follow-up every 9 weeks)** | **End of Treatment Visit18** | **Survival Follow-up19** |
| **Day** | D-28 to  D-1 | D21a | D21a | D21a | D21a | Within 21 days after last dose | - |
| Sign the informed consent form 2 | X |  |  |  |  |  |  |
| Demographic data | X |  |  |  |  |  |  |
| EGFR gene mutation test 3 | X |  |  |  |  |  |  |
| Medical history and treatment history | X |  |  |  |  |  |  |
| Inclusion/exclusion criteria | X |  |  |  |  |  |  |
| Vital signs 4 | X | X | X | X | X | X |  |
| Physical examination (including weight) 5 | X | X | X | X | X | X |  |
| ECOG performance status score | X | X | X | X | X | X |  |
| EQRTC C30/LC13 QOL  Questionnaire &LCSS | X |  | X | X | X | X |  |
| Blood samples for PK analysis | X | X | X | X(C4D21) |  | X (the day of departure) |  |
| Complete Blood Count (CBC)6 | X | X | X | X | X | X |  |
| Blood Biochemistry 7 | X | X | X | X | X | X |  |
| Urinalysis 8 | X | X | X | X | X | X |  |
| Viral serology 9 | X |  |  |  |  | X |  |
| Coagulation function 10 | X |  |  |  |  | X |  |
| Pregnancy test 11 (restricted to women of childbearing age) | X |  |  |  |  | X |  |
| 12-lead ECG 12 | X | X | X | X | X | X |  |
| Echocardiography 13 | X |  |  |  |  | X |  |
| Imaging evaluation14 | X |  | X | X | X | X |  |
| Randomization15 | X |  |  |  |  |  |  |
| Drug distribution and subject log16 | X | X | X | X | X |  |  |
| Drug return and subject log17 |  | X | X | X | X | X |  |
| Concomitant medication | X | X | X | X | X | X |  |
| Adverse events | X | X | X | X | X | X |  |
| Collection of survival status and subsequent anti-tumor treatmentstatus |  |  |  |  |  |  | X |

*: Routine screening tests (CBC, blood biochemistry, urinalysis, coagulation function, pregnancy test, and 12-lead ECG) must be completed within 7 days prior to the first dose. Cardiac ultrasound must be completed within 14 days prior to the first dose.

a: Window period is ±3 days, and imaging assessments are within ±7 days.

| **Note:** | |
| --- | --- |
| 1. Study procedure | The time window should follow the annotations. If adverse events or concomitant medications occur during the clinical visits not performed at the center, the investigator should be promptly contacted. |
| 2. Sign the informed consent form | Informed consent must be obtained before conducting any screening assessments specified in the protocol. |
| 3. EGFR gene mutation testing | Screening eligibility will be based on EGFR gene mutation testing conducted by local or central laboratories. All participants must provide biopsy tissue and/or archived tissue. The final inclusion criterion will be based on a positive result from the central laboratory's test. Detailed requirements for tumor tissue sample collection can be found in the central laboratory's operational manual. |
| 4. Vital signs | Vital signs include body temperature, pulse, seated blood pressure, and respiration rate. Participants must rest for at least 5 minutes before vital sign assessments. During the study, the investigator may increase the frequency of vital sign checks based on clinical indications. Vital sign checks will be performed on Day -1 and at each subsequent follow-up visit. |
| 5. Physical examination | A complete physical examination should be performed. Body weight (kg) must be measured. |
| 6. Complete Blood Count (CBC) | Red blood cell count, absolute neutrophil count, hemoglobin, white blood cell count and differential, platelet count. |
| 7. Blood biochemistry | ALT , AST , ALP , TBIL , DBIL , BUN or Urea , Cr , GGT , TP , ALB , potassium, sodium, chloride, calcium, magnesium, fasting blood glucose, LDH , CK , CK-MB , uric acid |
| 8. Urinalysis | Urinary glucose, protein, red blood cells, white blood cells, pH, ketones, specific gravity, nitrite, urobilinogen, bilirubin. |
| 9. Viral serology | Includes HIV antibodies, syphilis antibodies, hepatitis B (HBsAg positive or HBeAb positive subjects must undergo HBV DNA quantitative testing), HCV antibodies (HCV Ab positive subjects must undergo HCV RNA quantitative testing). Hepatitis B: HBsAg or HBeAb positive and HBV-DNA ≥ 2000 IU/mL; Hepatitis C: HCV antibody positive and HCV-RNA ≥ 1000 IU/mL. |
| 10.Coagulation  function | Coagulation panel, International Normalized Ratio (INR), and D-dimer. |
| 11.  Pregnancy test | All women of childbearing potential must undergo a blood pregnancy test during screening, with a negative result required. If there are delays in the menstrual cycle or pregnancy is suspected during treatment, the pregnancy test should be repeated. |
| 1. 12- lead ECG | A 12-lead ECG should be performed in the supine position after sufficient rest. One ECG should be performed at each assessment point. If the QTcF interval is prolonged (>500 msec), three additional ECGs should be conducted consecutively (at 5-minute intervals) to evaluate the average of the three QTcF intervals. Additional ECGs may be performed based on clinical indications or clinical difficulty. |
| 13. Echocardiography | Echocardiography should be performed at the screening visit and at the end-of-treatment visit. |
| 14.Imaging evaluation | Baseline imaging will include CT/MRI of the neck, chest, abdomen, pelvis, and head, bone scans, and other relevant examinations (as appropriate) to assess all lesions. Baseline CT/MRI scans may be performed up to 28 days before the first dose. Bone scans should be performed within 3 months before the first dose. If the imaging date falls between two follow-up visits, it will be scheduled for the later visit. For participants without brain metastases at baseline, head CT/MRI will be performed every 24 weeks (±7 days) starting from C1D1. For participants with bone metastases at baseline, bone scans will be performed every 24 weeks (±7 days) starting from C1D1. Imaging evaluation during the study treatment period will be calculated from C1D1, with assessments every 6 weeks (±7 days) for the first 18 cycles, and every 9 weeks (±7 days) thereafter, until disease progression, study termination, lost to follow-up, new antitumor therapy, or death, whichever occurs first. Imaging evaluations should be performed in the event of suspected new lesions. |
| 15.  Randomization | After all examinations during the screening period are completed and the screening is confirmed to be qualified, the randomization system can be entered and subjects will be randomly grouped on D-1. Subjects can take medication on the day of randomization. |
| 16.  Drug distribution and subject log | **FHND9041 capsule:**  The 24- day medicine is distributed in the first cycle ( multiple medicines are used during the 3- day window period); the 24 -day medicine is distributed in the second cycle (multiple medicines are used during the 3- day window period) at the C1D21 visit ; from the visit on the 21st day of the 2nd cycle to the 18th cycle From the 21st day visit on the 21st day of the 18th cycle, medicines will be distributed every 6 weeks during the follow-up period for 48 days (multiple 6- day window period medication); from the 18th day visit on the 21st day , medicines will be distributed every 9 weeks during the follow-up period for 72 days (multiple 9- day window medication period). medicine.  **Afatinib maleate tablets:**  Medications are distributed for 28 days in the first cycle (multiple doses are used during the 7- day window period); 28 - day medicine is issued for the second cycle (multiple doses are used during the 7- day window period) at the C1D21 visit; from the visit on the 21st day of the 2nd cycle to the 18th cycle From the 21st day visit on the 21st day of the 18th cycle, medicines will be distributed every 6 weeks during follow-up for 49 days (multiple 7-day window medication); from the 21st day of the 18th cycle , medication will be distributed every 9 weeks for 70 days ( multiple 7- day window medication). medicine.  Each time study medication is dispensed, the subject log is distributed at the same time. If a subject undergoes dose downgrading, a new subject diary will be used.  * In case of emergencies or statutory holidays, additional distribution of study drugs may be increased as appropriate. |
| 17.Drug return and subject log | Unused study medication and empty packaging must be returned during tumor assessment visits (C1D21 and subsequent cycles) and at the end-of-treatment visit. Completed subject logs should be collected and replaced with new ones. If a dose reduction occurs, the old log should be returned when a new log is issued |
| 18.End of treatment visit | All subjects must complete an end-of-treatment visit within 21 days after the last dose. If a tumor assessment has not been performed within 21 days prior to the visit, it must be done at this visit. If blood routine, biochemistry, urinalysis, coagulation function, HbA1c, pregnancy tests, or ECGs were performed within 7 days prior to this visit, these tests do not need to be repeated. |
| 19.Survival follow-up | After the end-of-treatment visit, the investigator will contact the participant or their family every 3 months (±7 days) via telephone to collect survival information and subsequent antitumor treatments, until the participant dies, is lost to follow-up, or refuses further follow-up, whichever occurs first. |

## List of Abbreviations

| AE | Adverse event |
| --- | --- |
| A/G | ALB/GLB |
| ALB | Albumi |
| ALT | Alanine aminotransferase |
| Ames | Ames trial |
| ANC | Absolute neutrophil count |
| APTT | Activated partial thromboplastin time |
| AST | Aspartate aminotransferase |
| BICR | blinded, independent, central review |
| BID | Bisindie |
| BP | Blood pressure |
| BUN | Blood urea nitrogen |
| CDISC | Clinical Data Interchange Standards Consortium |
| NMPA | National Medical Products Administration |
| CK | Creatine kinase |
| CK-MB | Creatine kinase isoenzymes |
| CNS | Central Nervous System |
| Cre | creatinine |
| CR | Complete response |
| CRF | Case report form |
| CT | Computed tomography |
| DBIL | Direct Bilirubin |
| DCR | Disease control rate |
| DLT | Dose-limiting toxicities |
| DOR | Duration of response |
| EC | Ethics Committee |
| ECG | electrocardiogram |
| ECOG | Eastern cooperative oncology group |
| EGFR | Epidermal Growth Factor Receptor |
| EIU | Pregnancy exposure/intrauterine exposure |
| EMA | European Medicines Agency |
| FAS | Full analysis set |
| FDA | Food and Drug Administration |
| FIB | Plasma fibrinogen |
| GCP | Good clinical practice |
| GGT | Glutamyl transpeptidase |
| HDL | High-density lipoprotein |
| Hgb | Hemoglobin |
| HR | Heart rate |
| ICH | Council for Harmonization |
| IEC | Independent ethics committee |
| IHC | immunohistochemistry |
| ILD | interstitial lung disease |
| INR | International normalized ratio |
| IRB | Institutional Review Board |
| ITT | Intention-to-treat |
| MRI | Magnetic resonance imaging |
| MTD | Maximum tolerated dose |
| Mono | Monocytes |
| NCI-CTCAE | National Cancer Institute Common Terminology Criteria Adverse Events |
| NSCLC | Non-small cell lung carcinoma |
| ORR | Objective response rate |
| OS | Overall survival |
| PAS | PK analysis set |
| PCR | Polymerase chain reaction |
| PD | Progressive Disease |
| PE | Physical examination |
| PET | Positron Emission computed tmography |
| PFS | Progression-Free Survival |
| PK | Pharmacokinetics |
| PPS | Per‑protocol set |
| QD | Quaque die |
| PR | Partial response |
| QTc | QT interval corrected for heart rate |
| RBC | Red blood cell |
| RD | Recommended Dose |
| SAE | Serious Adverse Event |
| SAS | Safety analysis set |
| SD | Stable Disease |
| SOP | Standard Operating Procedure |
| TBIL | Total bilirubin |
| TEAEs | Treatment-emergent adverse events |
| TTP | Time to progression |
| ULN | Upper limit of normal |
| WBC | White blood cell |

## 1 Research Background

## 1.1 Disease Background

Primary lung cancer (referred to as lung cancer) is the malignancy with the highest incidence and mortality rates in China. According to data released by the National Cancer Center in 2019, approximately 787,000 new lung cancer cases were diagnosed in China in 2015, with an incidence rate of 57.26 per 100,000 population, ranking first among all malignancies. Among these cases, 520,000 cases were male, with an incidence rate of 73.90 per 100,000, ranking first among malignancies in males, while 267,000 cases were female, with an incidence rate of 39.78 per 100,000, ranking second among malignancies in females. In 2015, approximately 631,000 deaths were attributed to lung cancer in China, with a mortality rate of 45.87 per 100,000, ranking first among all cancer-related deaths [1].

In 2020, the estimated number of new lung cancer cases in China reached 816,000, accounting for 17.9% of all new cancer cases, with 715,000 deaths (23.8% of total cancer deaths). Age-standardized rates (ASR) projected for 2020 were 47.8/100,000 (male) and 22.8/100,000 (female) for incidence, and 41.8/100,000 (male) and 19.7/100,000 (female) for mortality. Lung cancer is histologically classified into non-small cell lung cancer (NSCLC) and small cell lung cancer, with NSCLC constituting 85% of all cases[2].

Platinum-based doublet chemotherapy regimens have been the traditional standard treatment for advanced NSCLC, but the corresponding 5-year survival rate remains very low, at less than 5% [3]. Over the past three decades of clinical research, it has been observed that the efficacy of existing chemotherapeutic agents in advanced NSCLC patients has reached a plateau. Future research directions will focus on targeted therapies and immunotherapy as effective approaches to control tumor metastasis. In recent years, the emergence of small-molecule targeted drugs has represented a significant breakthrough in the treatment of NSCLC. Compared to traditional chemotherapy, these drugs are safer and more effective for patients with tumors harboring specific genetic abnormalities. Currently, small-molecule inhibitors that have been widely validated and used as first-line treatments for NSCLC primarily include epidermal growth factor receptor (EGFR) inhibitors.

Platinum-based doublet chemotherapy has been the traditional standard regimen for advanced NSCLC; however, the 5-year survival rate remains dismal (<5%)[3]. Over the past three decades, the therapeutic efficacy of chemotherapy in advanced NSCLC has plateaued, prompting a shift toward targeted therapies and immunotherapy as promising strategies to control tumor progression.

In recent years, the emergence of small-molecule targeted drugs has represented a significant breakthrough in the treatment of NSCLC. Compared to traditional chemotherapy, these drugs are safer and more effective for patients with tumors harboring specific genetic abnormalities. Currently, small-molecule inhibitors that have been widely validated and used as first-line treatments for NSCLC primarily include epidermal growth factor receptor (EGFR) inhibitors[4]- [9].

## 1.2 Clinical Advancements in EGFR Inhibitors

The EGFR (epidermal growth factor receptor) is a transmembrane receptor belonging to the ERBB family of tyrosine kinases. Located on the cell membrane, EGFR binds to epidermal growth factor (EGF) or other ligands, leading to dimerization (homodimerization or heterodimerization) and subsequent activation of downstream signaling pathways (RAS/MAPK and AKT/PI3K) via ATP-dependent phosphorylation. These pathways regulate critical cellular processes, including proliferation, survival, and apoptosis. EGFR mutations are detected in approximately 20% of adenocarcinoma (ADC) patients, primarily driving constitutive receptor activation. The most frequent mutations include exon 19 deletions (45–50%) and the exon 21 L858R point mutation (35–40%), collectively accounting for 85% of EGFR alterations. Notably, these mutations are highly prevalent in Asian female never-smokers with ADC[10]-[13].

Global pharmaceutical companies have initiated the development of third-generation EGFR inhibitors targeting EGFR mutations(including EGFRm+and T790M+), including Rociletinib (CO-1686) by Clovis Oncology, Osimertinib (AZD9291) by AstraZeneca, HM61713 by Hanmi Pharmaceutical, EGF816 by Novartis , ASP8271 by Astellas, AC-0010 by Acebright Pharmaceuticals. It is noteworthy that these inhibitors not only suppress the activity of T790M but also exhibit strong activity against EGFRm+. Furthermore, they demonstrate improved selectivity, showing minimal activity against other kinases and reduced activity against wild-type EGFR (EGFR WT) compared to first- and second-generation EGFR TKIs[14].

FHND9041, a novel third-generation EGFR inhibitor developed by Nanjing Chuangte Pharmaceutical Technology Co., Ltd., binds irreversibly to EGFR and demonstrates robust inhibitory effects against both EGFR T790M resistance mutations and EGFR-sensitive mutations. FHND9041 inhibits tumor growth by suppressing the phosphorylation of EGFR and its downstream signaling molecules, thereby modulating tumor cell proliferation and apoptosis. Notably, FHND9041 exhibits weak inhibitory activity against wild-type EGFR protein, which helps avoid potential toxicity associated with the inhibition of wild-type EGFR[15].

## 1.3 Study Drug

## 1.3.1 Drug Name

Identification Code: FHND9041 Capsule

Chinese Generic Name: Not available

English Name: Not available

Chinese Chemical Name:

N-(5-((4-(5,6-Dihydro-4H-pyrrolo[3,2,1-ij]quinolin-1-yl)pyrimidin-2-yl)amino)-4-methoxy-2-(methyl(2-(methyl(methyl-d3)amino)ethyl)amino)phenyl)acetamide methanesulfonate

English Chemical Name:

N-(5-((4-(5,6-Dihydro-4H-pyrrolo[3,2,1-ij]quinolin-1-yl)pyrimidin-2-yl)amino)-4-methoxy-2-(methyl(2-(methyl(methyl-d3)amino)ethyl)amino)phenyl)acrylamide methanesulfonate

## 1.3.2 Chemical Structure, Molecular Formula, and Molecular Weight

Molecular Formula: C31H36D3N7O5S

Molecular Weight: 624.78


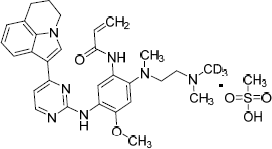
Chemical Structure:

## 1.3.3 Dosage Form and Specification

Oral Capsule: Available in 20 mg/capsule and 80 mg/capsule (based on free base).

## 1.3.4 Indications

The drug is intended for use in patients with NSCLC who have developed resistance to EGFR inhibitors with T790M mutation; and as first-line treatment for NSCLC patients positive for EGFR sensitizing mutations.

## 2 Preclinical Studies

## 2.1 Summary of Pharmacodynamic Studies

## *In Vitro* Pharmacodynamic Studies

The kinase inhibition activity of FHND9041 was tested against 84 kinases. FHND9041 selectively inhibits the activity of EGFR family kinases, with the strongest inhibitory activity observed against the drug-resistant mutant EGFR T790M/L858R and the exon 19 deletion-activated mutant EGFR d746-750, showing good selectivity. Its metabolite, FHND9041-M10, also exhibits similar inhibition activity to the parent compound at the enzyme level. Additionally, FHND9041 demonstrates relatively weak inhibition of IGF1R and INSR, with inhibition rates of only 44% and 41% at 1000 nM, respectively, and an IC50 > 1000 nM, which is more than 1332 times higher than the IC50 for EGFR (T790M/L858R). Therefore, it is speculated that FHND9041 will not induce high blood sugar side effects similar to CO-1686 at effective doses.

Table 2.1.1Inhibition Activity of FHND9041 and Its Active Metabolite FHND9041-M10 Against Kinases

| Kinase ID | IC50(nM) | |
| --- | --- | --- |
| FHND9041 | FHND9041-M10 |
| EGFR (ErbB1) | 2.85 | 1.80 |
| EGFR (ErbB1) T790M L858R | 0.751 | 0.695 |
| EGFR (ErbB1) d746-750a | 0.343 | 0.598 |
| EGFR (ErbB1) L858R | 3.20 | 3.31 |
| EGFR (ErbB1) G719C | 42.4 | — |
| EGFR (ErbB1) G719S | 40.4 | — |
| EGFR (ErbB1) L861Q | 1.54 | — |
| ALK | 63.6 | — |
| BLK | 290 | — |
| BTK | 62.4 | — |
| ERBB2 (HER2) | 18.4 | — |
| ERBB4 (HER4) | 8.46 | — |
| JAK3 | 13.1 | — |
| LRRK2b | 97.3 | — |
| MAP3K9 (MLK1) | 113 | — |
| PTK2 (FAK) | 166 | — |
| PTK6 (Brk) | 85.7 | — |
| ROS1 | 22.8 | — |
| STK22D (TSSK1) | 152 | — |
| TXK | 78.6 | — |

## 2.1.2 *In Vivo* Pharmacodynamics Studies

The *in vivo* antitumor efficacy of FHND9041 was evaluated using the following xenograft models in nude mice: NCI-H1975 human lung adenocarcinoma model with the EGFR T790M/L858R resistant mutation, HCC827 human lung adenocarcinoma model with the EGFR DEL19 sensitive mutation, PC-9 human lung adenocarcinoma model, A431 human skin carcinoma model with wild-type EGFR (EGFRWT)

Oral doses of 5, 10, and 20 mg/kg/day were administered once daily for 9 to 15 days. In the NCI-H1975, HCC827, and PC-9 models, the effective dose of FHND9041 was 10 mg/kg, achieving tumor growth inhibition rates of 91%, 76%, and 89%, respectively. The inhibition rate increased with dose escalation, showing a good dose-response relationship. At the highest dose of 20 mg/kg/day, the inhibition rates were 121%, 98%, and 148%, respectively. In the A431 model with EGFRWT, FHND9041 at doses of 5 and 10 mg/kg showed no significant inhibition of tumor growth, and at the highest dose of 20 mg/kg, the inhibition rate was only 53%, indicating good selectivity.

## Summary of Toxicological Research

## 2.2.1 Safety Pharmacology Research

**Safety Pharmacology Study in Conscious Beagle Dogs:**After oral administration of FHND9041 at doses of 5, 10, or 20 mg/kg to conscious Beagle dogs, no effects on blood pressure, heart rate, or ECG parameters were observed within 24 hours.

**Effects on Central Nervous System Function in Rats:**
Under the experimental conditions, SD rats received single oral doses of 15, 25, or 50 mg/kg FHND9041. Using a Functional Observational Battery (FOB), no effects on the central nervous system were observed up to 24 hours post-dose.

**Effects on Respiratory System Function in Rats:**
No impacts of FHND9041 on respiratory frequency, tidal volume, or minute ventilation were observed within 24 hours following a single oral dose. In conclusion, single oral administration of FHND9041 at 15, 25, or 50 mg/kg to SD rats showed no effects on respiratory function within 24 hours. Effect on hERG potassium channel current stably expressed in Chinese hamster ovary cells: The IC50 value of FHND9041 for hERG potassium channels was determined to be 1.62 μM.

## Single-Dose Toxicity Studies

**Maximum Tolerated Dose (MTD) Toxicity Study in Rats via Oral Gavage**
Under the experimental conditions, the MTD of FHND9041 after a single oral dose was 1000 mg/kg for male rats and 500 mg/kg for female rats.

**MTD Toxicity Study in Beagle Dogs via Oral Gavage**
Single oral administration of FHND9041 at doses of 30, 100, 300, 500, and 1000 mg/kg to Beagle dogs resulted in no test article-related mortality, urinalysis changes, or macroscopic lesions. Observed test article-related clinical signs, body weight changes, reduced food consumption, and clinical pathology alterations (hematology, coagulation, serum biochemistry) were non-adverse and recovered by the end of the observation period. Therefore, the MTD for both male and female Beagle dogs was determined to be 1000 mg/kg.

## Repeated-Dose Toxicity Studies

**Repeated-Dose Study in Rats**
SD rats were administered the test article FHND9041 via oral gavage once daily for 28 consecutive days at doses of 15, 25, or 50 mg/kg/day. The animals were well-tolerated, with no test article-related deaths, clinical signs, ophthalmologic examinations, clinical pathology (hematology, coagulation parameters, serum biochemistry, urinalysis), gross anatomy, or organ weight changes observed. Non-adverse changes related to the test article administration were observed only in the 50 mg/kg/day dose group, including mild reductions in food consumption and body weight. Adverse changes associated with the test article included mammary gland acinar atrophy and uterine glandular atrophy in the 50 mg/kg/day dose group at the end of dosing, as well as vaginal epithelial single-cell necrosis and mucification in doses ≥25 mg/kg/day. These changes fully recovered after a 28-day recovery period.

Under the experimental conditions, the no-observed-adverse-effect level (NOAEL) was determined as 15 mg/kg/day for both male and female rats. At this dose on Day 28, the Cmax and AUC0-24h of FHND9041 were 133 ng/mL and 1360 h*ng/mL, respectively, in males, and 245 ng/mL and 2490 h*ng/mL, respectively, in females. For the metabolite FHND9041-M10, the Cmax and AUC0-24h were 7.2 ng/mL and 71.6 h*ng/mL, respectively, in males, and 4.5 ng/mL and 47.9 h*ng/mL, respectively, in females.

**Repeated-Dose Study in Dogs**
Beagle dogs were administered FHND9041 via oral gavage once daily for 4 consecutive weeks at doses of 5, 10, or 20 mg/kg/day. No test article-related adverse effects were observed at 5 mg/kg/day. Adverse effects at doses ≥10 mg/kg/day included clinical observations, reduced body weight and food consumption, ophthalmologic findings, hematological parameters, and pathological changes (bone marrow). The NOAEL in this study was determined as 5 mg/kg/day. At this dose on Day 28, the systemic exposure (Cmax and AUC0-24h) in males was 446 ng/mL and 6020 h*ng/mL, respectively, and in females was 319 ng/mL and 3650 h*ng/mL, respectively.

## Genotoxicity Studies

Bacterial reverse mutation test: Under this test condition, the bacterial reverse mutation test result of the test product FHND9041 was negative.

In vitro chromosomal aberration test in Chinese hamster ovary cells: Under the conditions of this test, the potential of FHND9041 to induce chromosomal structural aberrations in CHO-WBL cells was negative.

Orally administered rat peripheral blood cell micronucleus test: The test product FHND9041 showed negative results in the rat peripheral blood cell micronucleus test.

## Summary of Pharmacokinetic Studies

## 2.3.1 Absorption of FHND9041

In vitro Caco-2 cell permeability test: FHND9041 exhibits low permeability in Caco-2 cells and is most likely a substrate for efflux transporters.

**Rat Absorption Test:**

After intravenous administration of 1 mg/kg FHND9041 in rats, FHND9041 was rapidly distributed in the body, with a steady-state apparent volume of distribution (Vdss) of 17.7 ± 2.62 L/kg and a plasma clearance rate of 69.6 ± 18.7 mL/min/kg. Data showed that FHND9041-M10, a metabolite of FHND9041, was generated in both male and female Sprague-Dawley (SD) rats after intravenous or oral administration of FHND9041. Following a single oral dose of 5 mg/kg, the average bioavailability of FHND9041 in male and female rats was 42.6%. Comparing the pharmacokinetic parameters of FHND9041 and FHND9041-M10, there was no significant difference in half-life, but the time to peak concentration (Tmax) of FHND9041-M10 was later than that of FHND9041. In individual male and female rats, the ratio of systemic exposure (AUC) of FHND9041-M10 to FHND9041 ranged from 0.0102 to 0.0295.

Within the dose range of 5 to 30 mg/kg, the Cmax and AUC0-inf of both FHND9041 and FHND9041-M10 increased proportionally with dose. After a single intravenous or oral dose of FHND9041 in male and female SD rats, significant gender differences were observed in the pharmacokinetics of FHND9041, but not in FHND9041-M10. In single-dose rats, the AUC0-last ratio of FHND9041 in female to male rats ranged from 1.69 to 3.35, while the AUC0-last ratio of FHND9041-M10 in female to male rats ranged from 0.548 to 1.06. After 7 days of continuous administration of FHND9041 (10 mg/kg once daily), the pharmacokinetic behavior of FHND9041 and FHND9041-M10 on Day 1 and Day 7 was similar, with no significant accumulation. The Cmax accumulation index (Day 7/Day 1) for FHND9041 was 1.43 in male rats and 1.78 in female rats, while the AUC0-24 accumulation index (Day 7/Day 1) was 1.50 in male rats and 1.52 in female rats. For FHND9041-M10, the Cmax accumulation index (Day 7/Day 1) was 1.46 in male rats and 2.03 in female rats, while the AUC0-24 accumulation index (Day 7/Day 1) was 1.55 in male rats and 1.79 in female rats. The average pharmacokinetic parameters of FHND9041 and FHND9041-M10 after a single dose in rats are detailed in Tables 2.3.1-1 and 2.3.1-2.

Table **2.3.1-1** Average pharmacokinetic parameters of FHND9041 in male and female SD rats after a single administration of FHND9041**(n=6)**

| Group | 1 | | 2 | | 3（Day1） | | 4 | |
| --- | --- | --- | --- | --- | --- | --- | --- | --- |
| Route of administration | Intravenous injection | | oral | | oral | | oral | |
| dose（mg/kg） | 1 | | 5 | | 10 | | 30 | |
| Pharmacokinetic parameters | mean | SD | mean | SD | mean | SD | mean | SD |
| C0 or Cmax (ng/mL) | 111 | 16.6 | 52.4 | 25.7 | 129 | 46.2 | 284 | 106 |
| Tmax (h) | — | — | 5.33 | 1.63 | 5.33 | 1.03 | 3.67 | 1.97 |
| T1/2(h) | 3.36 | 0.969 | 3.42 | 1.26 | 5.05 | 2.40 | 5.09 | 2.10 |
| Vdss (L/kg) | 17.7 | 2.62 | — | — | — | — | — | — |
| CL (mL/min/kg) | 69.6 | 18.7 | — | — | — | — | — | — |
| AUC0-24h (ng/mL•h) | 254 | 76.8 | 532 | 306 | 1430 | 854 | 3100 | 1550 |
| AUC0-last (ng/mL•h) | 236 | 85.3 | 515 | 317 | 1410 | 874 | 3260 | 1750 |
| AUC0-inf (ng/mL•h) | 258 | 82.8 | 550 | 325 | 1570 | 1020 | 3400 | 1910 |
| F (%)a | — | — | 42.6 | — | 60.9 | — | 43.9 | — |

a:AUC 0-inf and theoretical dose are used to calculate bioavailability;--:Not applicable

Table **2.3.1-2** Average pharmacokinetic parameters of **FHND9041-M10** in male and female **SD** rats after a single administration **of FHND9041(n=6)**

| Group | 1 | | 2 | | 3（Day1） | | 4 | |
| --- | --- | --- | --- | --- | --- | --- | --- | --- |
| Route of administration | Intravenous injection | | oral | | oral | | oral | |
| dose（mg/kg） | 1 | | 5 | | 10 | | 30 | |
| Pharmacokinetic parameters | mean | SD | mean | SD | mean | SD | mean | SD |
| C0 or Cmax (ng/mL) | 0.279 | 0.0798 | 1.63 | 0.978 | 3.46 | 0.882 | 7.42 | 2.77 |
| Tmax (h) | 4.17 | 2.86 | 7.33 | 1.63 | 5.67 | 0.816 | 5.67 | 1.51 |
| T1/2(h) | 4.85 | 0.876 | 3.79 | 1.09 | 5.77 | 2.61 | 5.50 | 1.68 |
| AUC0-24 (h•ng/mL) | 3.90 | 0.356 | 20.5 | 7.38 | 37.0 | 9.12 | 92.1 | 30.5 |
| AUC0-last (h•ng/mL) | 2.40 | 0.896 | 14.2 | 10.2 | 37.0 | 9.12 | 96.3 | 29.9 |
| AUC0-inf (h•ng/mL) | 4.07 | 0.271 | 21.3 | 8.27 | 41.0 | 12.3 | 99.2 | 28.9 |

**Dog Absorption Test:**

After a single intravenous dose of 1 mg/kg FHND9041 in male and female beagle dogs, the plasma clearance (CL) was 12.8 ± 4.59 mL/min/kg, and the steady-state apparent volume of distribution (Vdss) was 9.39 ± 3.02 L/kg. After a single oral dose of 2 mg/kg, 4 mg/kg, and 8 mg/kg FHND9041, the bioavailability was 57.6%, 59.5%, and 56.9%, respectively.

After a single oral dose of 2, 4, and 8 mg/kg FHND9041 in male and female beagle dogs, the AUC0-24h in female dogs increased more than proportionally when the dose increased from 2 to 4 mg/kg. However, when the dose increased from 4 to 8 mg/kg, the Cmax and AUC0-24h in male dogs increased less than proportionally. No significant gender differences were observed in systemic exposure (AUC0-24h and Cmax) in the low and medium dose groups, but significant gender differences were observed in the high dose group, with higher exposure in female dogs than in male dogs.

After 7 days of continuous oral administration of 4 mg/kg FHND9041, the systemic exposure (AUC0-24h and Cmax) of FHND9041 in male dogs was 1.53 and 1.48 times that of Day 1, respectively, while in female dogs, it was 1.41 and 1.14 times that of Day 1, respectively, indicating no significant accumulation. The average pharmacokinetic parameters of FHND9041 and FHND9041-M10 after a single dose in beagle dogs are detailed in Tables 2.3.1-3 and 2.3.1-4.

Table 2.3.1-3 Average pharmacokinetic parameters of male and female beagle dogs after single or multiple administrations of FHND9041**(n=6)**

| Group | 1 | | 2 | | 3（D1） | | 3（D7） | | 4 | |
| --- | --- | --- | --- | --- | --- | --- | --- | --- | --- | --- |
| Route of administration | Intravenous injection | | oral | | oral | | oral | | oral | |
| dose（mg/kg） | 1 | | 2 | | 4 | | 4 | | 8 | |
| Pharmacokinetic parameters | mean | SD | mean | SD | mean | SD | mean | SD | mean | SD |
| C0 or Cmax (ng/mL) | 223 | 69.7 | 121 | 63.1 | 267 | 144 | 348 | 219 | 461 | 419 |
| Tmax (h) | -- | -- | 2.33 | 0.816 | 3.00 | 1.10 | 4.67 | 1.63 | 2.33 | 0.816 |
| T1/2(h) | 9.73 | 3.21 | 8.29 | 1.75 | 9.98 | 2.18 | 11.5 | 2.73 | 9.18 | 1.96 |
| Vdss (L/kg) | 9.39 | 3.02 | -- | -- | -- | -- | -- | -- | -- | -- |
| CL (mL/min/kg) | 12.8 | 4.59 | -- | -- | -- | -- | -- | -- | -- | -- |
| AUC0-last (h•ng/mL) | 1440 | 742 | 1660 | 995 | 3430 | 1920 | 6250 | 4320 | 6550 | 5890 |
| AUC0-inf (h•ng/mL) | 1520 | 757 | 1760 | 1020 | 4510 | 2770 | 6740 | 4740 | 6780 | 6100 |
| AUC0-24h (h•ng/mL) | 1260 | 612 | 1460 | 970 | 3430 | 1920 | 4970 | 3350 | 5550 | 4960 |
| Bioavailability(%)a | -- | -- | 57.6 | -- | 59.5 | -- | -- | -- | 56.9 | -- |

a:AUC 0-48h and theoretical dose are used to calculate bioavailability;--:Not applicable;D#:Animal number

Table 2.3.1-4 FHND9041-M10 in the plasma of male and female beagle dogs after single or multiple administrations of FHND9041 Average pharmacokinetic parameters(n=6)

| Group | 1 | | 2 | | 3（D1） | | 3（D7） | | 4 | |
| --- | --- | --- | --- | --- | --- | --- | --- | --- | --- | --- |
| Route of administration | Intravenous injection | | oral | | oral | | oral | | oral | |
| dose（mg/kg） | 1 | | 2 | | 4 | | 4 | | 8 | |
| Pharmacokinetic parameters | mean | SD | mean | SD | mean | SD | mean | SD | mean | SD |
| Cmax (ng/mL) | 5.92 | 3.02 | 16.7 | 6.51 | 28.7 | 13.3 | 53.9 | 30.8 | 42.3 | 24.6 |
| Tmax (h) | 7.33 | 1.63 | 7.33 | 1.03 | 7.33 | 3.01 | 6.67 | 1.03 | 8.00 | 0.00 |
| T1/2(h) | 17.3 | 7.11 | 12.0 | 2.33 | 15.5 | 5.50 | 16.6 | 7.38 | 12.4 | 3.37 |
| AUC0-last (h•ng/mL) | 156 | 74.0 | 349 | 149 | 483 | 238 | 1280 | 883 | 986 | 628 |
| AUC0-inf (h•ng/mL) | 186 | 82.1 | 382 | 175 | 878 | 617 | 1530 | 1060 | 1100 | 722 |

## Distribution of FHND9041

**Plasma Protein Binding:** At tested concentrations of 0.2, 2, and 10 μM, FHND9041 exhibited moderate plasma protein binding rates in mice and humans (93.3–94.2% and 71.1–86.3%, respectively), while showing high binding rates in rats, beagle dogs, and cynomolgus monkeys (92.4–95.3%, 97.2–97.5%, and 93.8–95.8%, respectively). No significant concentration-dependent binding was observed in the plasma of any of the five species.

**Rat Tissue Distribution Study:**
Following a single oral administration of 10 mg/100 μCi/kg [14C]FHND9041 to male and female SD rats, total radioactivity was widely distributed in vivo, with high levels detected in the lungs, gastrointestinal tract walls, liver, spleen, and kidneys. Except for the intestinal wall, liver, and stomach wall, which reached or approached peak concentrations (Cmax) at the first sampling time point (0.5 hours post-dose), total radioactivity in other tissues reached or approached Cmax at 4 hours post-dose. At 4 hours post-dose, total radioactivity in the whole brain was approximately 2.32 times that in plasma, indicating that FHND9041 can cross the blood-brain barrier. By 24 hours post-dose, total radioactivity in all tested tissues decreased by 47.7% (whole blood) to 94.3% (intestinal wall) compared to levels at 4 hours. Total radioactivity was rapidly eliminated, with minimal residual distribution (≤1.19% of the administered dose) detected in all tissues at the final sampling time point (72 hours). No significant gender-related differences in total radioactivity distribution were observed between male and female animals across tissues, whole blood, or plasma.

## Metabolism of FHND9041

**Metabolic Stability Study:**
The half-lives of 1 μM FHND9041 in mouse, rat, beagle dog, cynomolgus monkey, and human liver microsomes were 12.8, 31.1, 46.5, 23.3, and 72.9 minutes, respectively. The corresponding CLint(liver) values were 427.7, 80.3, 42.9, 80.2, and 17.1 mL/min/kg, respectively. Based on these results, FHND9041 can be classified as a medium-clearance drug in rat, beagle dog, cynomolgus monkey, and human liver microsomes, and as a high-clearance drug in mouse liver microsomes.

***In Vitro* Metabolite Identification:**
LC/MS was used to analyze and identify the possible metabolites of FHND9041 in human, monkey, dog, rat, and mouse liver microsome incubation systems. A total of 15 metabolites were detected and identified, which are M1, M2, and M7 (mono-oxidation and demethylation); M3, M4, M8, M11, and M12 (mono-oxidation); M5 (double oxidation); M6 and M10 (demethylation); M9 (mono-oxidation, demethylation, and dealkylation); M13 (demethylation and dealkylation); M14 (mono-oxidation and dealkylation); and M15 (dealkylation). In human liver microsomes, the UV peak area percentage of all metabolites was less than 7.51%, indicating they are minor metabolites. In monkey liver microsomes, M6 (10.17%) and M10 (20.06%) were the major metabolites. In dog liver microsomes, M10 (20.11%) and M11 (19.38%) were the major metabolites. In rat liver microsomes, M6 (26.80%), M10 (11.72%), M13 (13.93%), and M15 (11.19%) were the major metabolites. In mouse liver microsomes, M10 (42.05%) was the major metabolite. The parent drug (FHND9041) had a UV peak area percentage greater than 26% in human, monkey, dog, rat, and mouse liver microsomes and was considered the main component. Compared with other species, no specific metabolites were detected in human liver microsomes after incubation at 37°C for 60 minutes.

LC/MS was also used to analyze and identify the possible metabolites of FHND9041 in human, monkey, dog, rat, and mouse hepatocytes. FHND9041 is mainly metabolized in human, monkey, dog, rat, and mouse hepatocytes through metabolic pathways such as oxidation, dehydrogenation, demethylation, dealkylation, glutathione conjugation, and hydrolysis. A total of 20 metabolites were detected, which were M1a (oxidation, demethylation, and glutathione conjugation products); M1, M2, and M7 (oxidation and demethylation products); M2a, M2b, and M2c (oxidation and glutathione conjugation products); M3, M8, and M11 (oxidation products); M4a (M6b hydrolysis product); M6a (demethylation and glutathione conjugation product); M6b (glutathione conjugation product); M6 and M10 (demethylation products); M7a (dealkylation, demethylation, and glutathione conjugation products); M10a (oxidation and dehydrogenation products); M10b (oxidation, dealkylation, and glutathione conjugation products); M10c (dealkylation and glutathione conjugation products); and M13 (dealkylation and demethylation products). In human hepatocytes, M10 (UV peak area percentage of 6.82%) was the major metabolite. In monkey hepatocytes, M2 (7.20%), M4a (13.03%), M6a (12.53%), M6b (32.90%), and M10 (10.73%) were the major metabolites. In dog hepatocytes, M3 (8.57%), M10 (15.66%), and M11 (5.96%) were the major metabolites. In rat hepatocytes, M1a (9.25%), M2b (6.63%), M2 (18.01%), M6b (30.64%), and M10c (9.44%) were the major metabolites. In mouse hepatocytes, M7a (8.03%), M8 (8.02%), M10b (32.57%), M10c (15.26%), and M10 (19.42%) were the major metabolites. The parent drug (FHND9041) had a UV peak area percentage greater than 50.56% in human and dog hepatocytes, but the UV peak area percentages of FHND9041 in monkey, rat, and mouse hepatocytes were 13.63%, 2.35%, and 5.94%, respectively. In human hepatocytes, the 10 metabolites detected could all be detected in at least one animal species, indicating that FHND9041 did not produce unique metabolites after incubation in human hepatocyte samples at 37°C for 120 minutes.

Since FHND9041 has low stability in human and mouse plasma, the metabolites of FHND9041 (10 μM) in human and mouse plasma were also detected. The research results showed that the parent drug FHND9041 is stable in human and mouse plasma at 37°C, and no metabolites were detected after 120 minutes of incubation.

***In Vitro* Metabolic Enzyme Phenotyping:**
For the generation of metabolite M10 of the test compound FHND9041, CYP3A is the main metabolic enzyme responsible for the production of M10. Montelukast sodium, an inhibitor of CYP2C8, showed a certain inhibitory effect on the production of M10, with an inhibition rate of 32.1%, indicating that CYP2C8 is a minor metabolic enzyme in the production of M10. Specific inhibitors of other isoenzymes (CYP1A2, CYP2B6, CYP2C9, CYP2C19, and CYP2D6) had no significant inhibitory effect on the production of M10. The results of the recombinant human cytochrome P450 enzyme metabolism experiment showed that the relative contribution rate of CYP3A4 to the production of metabolite M10 was 99.8%, indicating that CYP3A4 is the main metabolic enzyme for the production of M10, while other isoenzymes (CYP1A2, CYP2B6, CYP2C8, CYP2C9, CYP2C19, and CYP2D6) play little or no role in the production of M10. For metabolites M15, M3, and M6, the results of specific chemical inhibitor inhibition experiments and recombinant human cytochrome P450 enzyme metabolism experiments showed that CYP3A is the main metabolic enzyme for the production of M15, M3, and M6. Other isoenzymes (CYP1A2, CYP2B6, CYP2C8, CYP2C9, CYP2C19, and CYP2D6) play little or no role in the production of M15, M3, and M6.

## 2.3.4 Excretion of FHND9041

After a single oral administration of [14 C] FHND9041 to male and female rats, the excretion rate and amount of total radioactivity in male and female rats were similar. The total recovery rate within 0-168 hours was 96.98%of the administered amount; it was mainly excreted in feces. Accounting for 93.72%of the dose; excretion mainly occurs within 48 hours after administration, accounting for approximately 92.66%of the dose. After a single oral administration to male and female BDC rats, the total excretion within 0-72 hours was 96.41%of the dose, of which the total bile excretion accounted for 57.10%of the dose. Based on the estimated total radioactive excretion in bile and urine of BDC rats, the oral absorption rate of FHND9041 is at least 61.32%.

## Drug-drug Interactions

**CYP450 enzyme inhibition experiment:** FHND9041 has a moderate inhibitory effect on CYP1A2(IC 50 is 7.16μM), and has a moderate inhibitory effect on CYP3A4(using testosterone as a substrate) (IC 50 is 11.8μM), CYP2B6(IC 50 is 11.9μM),and CYP2C8(IC 50 is 17.7μM),CYP3A4(with midazolam as substrate)(IC 50 is 18.5μM),CYP2C19(IC 50 is 26.5μM),CYP2D6(IC 50 is 36.5μM)and CYP2C9(IC 50 is 47.1μM)have weak inhibitory effect.**CYP450 enzyme induction assay:**FHND9041 is not an inducer of cytochrome P450 isoenzymes CYP1A2,CYP2B6 and CYP3A4 at concentrations of 0.100,1.00 and 10.0μM.

## Summary of Clinical Effectiveness Studies

As of May 2021, the FHND9041 project has completed the enrollment of subjects in Phase I/II clinical trials, and has obtained relevant trial results, which are summarized as follows.

## Pharmacokinetic Results

**Single administration**

A single-dose pharmacokinetic trial in the 40-180 mg dose range was conducted on NSCLC patients, and the results showed (see Table 2.4.1-2and Figure 1 for details):

According to the test results of the plasma samples of the first two subjects with 40mg, the exposure of the metabolite M10 was far less than 10%of the exposure of the prototype drug. Therefore, it is speculated that most of the prototype exists in the body, so only the prototype will be tested in subsequent samples.

t 1/2: The half-life of each dose group is longer,40,80,120, and 180 mg groups are 64.7±5.2,86.9±41.2,82.3±52.6, and 76.6±35.8 h respectively, which meets the once-a-day dosing requirements.

T max: Except for the low-dose 40 mg group, which has a slightly shorter peak time (5.7±0.6 h),the 80,120,and 180 mg groups have similar peak times, which are 12±10.6,10.7±11.6,and 11.3±11.0 h respectively.

Cmax: The dosage is 40-180 mg. Cmax increases with the increase of dose, but not proportionally. The 40,80,120, and 180 mg groups were 62.9±25.6,104.7±136.6,246.3±100.3,and 294.5±201.8 ng/mL respectively.

AUC 0-168h: The dosage is 40-180mg.AUC 0-168h increases with the dose, but not proportionally. It has reached a plateau in the 120mg dose group. When the dose is increased to 180mg, there is basically no increase in AUC. The 40,80,120,and 180 mg groups were 3309.3±827.6,4901.0±4711.0,14732.4±2215.4,and 13788.7±7026.8 h*ng/mL, respectively.

AUC INF_obs: Dosage 40-180mg, the trend is the same as AUC 0-168h, each group is 3872.8±813.9,5954.8±4701.8,18987.9±2709.6,16071.7±6512.6 h*ng/mL.

Table 2.4.1-1 Pharmacokinetic parameters of single administration of FHND9041 capsules

| **dose** | **HL_Lambda_z** | **Tmax** | **Cmax** | **AUC0-168h** | **AUCINF_obs** |
| --- | --- | --- | --- | --- | --- |
| **(mg)** | **(h)** | **(h)** | **(ng/mL)** | **(h*ng/mL)** | **(h*ng/mL)** |
| **40** | 64.7±5.2 | 5.7±0.6 | 62.9±25.6 | 3309.3±827.6 | 3872.8±813.9 |
| **80** | 86.9±41.2 | 12±10.6 | 104.7±136.6 | 4901.0±4711.0 | 5954.8±4701.8 |
| **120** | 82.3±52.6 | 10.7±11.6 | 246.3±100.3 | 14732.4±2215.4 | 18987.9±2709.6 |
| **180** | 76.6±35.8 | 11.3±11.0 | 294.5±201.8 | 13788.7±7026.8 | 16071.7±6512.6 |

**Multiple administrations**

Multiple-dose pharmacokinetic trials in the 40-180 mg dose range were conducted on NSCLC patients, and the results showed (see Table 3 for details):

- 1. In the dose range of 40-120 mg, both AUC and Cmax increased non-linearly with the increase in dose, and reached a plateau at the dose of 120 mg. When the dose was increased to 180 mg, there was no significant increase in AUC and Cmax.
  2. The drug was administered once a day, and each group reached a steady state after about 15-18 days of administration. At steady state, the Cmax of each group is approximately 1.5 times the C min.

**Table 2.4.1-2 Pharmacokinetic parameters of FHND9041 capsules after multiple administrations**

| **dose** | **Tss，max** | **Css，max** | **Css，min** | **AUCss** | **RAC** |
| --- | --- | --- | --- | --- | --- |
| **(mg)** | **(h)** | **(ng/mL)** | **(ng/mL)** | **(h*ng/mL)** |  |
| **40** | 5.3±4.0 | 162.7±24 | 109.1±16.9 | 3210.5±350.3 | 7.1±2.9 |
| **80** | 4.0±1.0 | 315.0±168.9 | 216.3±105.0 | 6224.5±2855.2 | 85.9±142.0 |
| **120** | 3.0±1.0 | 669±195.7 | 423.0±163.5 | 12688.5±4620.2 | 3.8±1.1 |
| **180** | 7.5±3.5 | 625.0±173.9 | 435.5±116.7 | 13370.5±4058.1 | / |


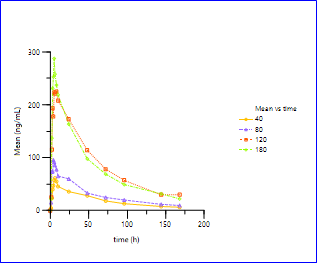

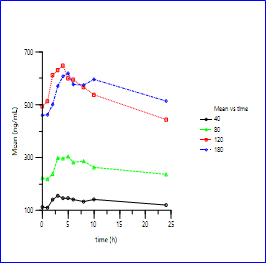


**Figure 1 Changes in plasma concentration over time of single and multiple administrations of FHND9041 capsules (left side is single administration,right side is multiple administrations)**

## Efficacy Results

As per the trial plan, enrollment has been completed for all subjects in the tolerability and dose-expansion cohorts (except for 10 remaining subjects in the 120 mg group). As of March 20, a total of 111 subjects (including 37 first-line treatment subjects) have been enrolled, among whom 78 subjects have completed at least one efficacy evaluation. The results show that:

In the 40 mg dose group, FHND9041 has demonstrated efficacy (one subject has maintained a PR for 20 months and continues treatment);

The 80 mg group showed more pronounced efficacy, with an ORR of 63.64% (21/33);

The 80 mg first-line treatment group exhibited even better efficacy, with a current ORR of 71.43% (20/28).

Details are provided in the table below:

| **Group** | **Dose** | **Planned Enrollment** | **Enrolled** | **Evaluable** | **PR** | **SD** | **PD** | **ORR (%)** | **Remarks** |
| --- | --- | --- | --- | --- | --- | --- | --- | --- | --- |
| T790M+ | 40 mg | 3 | 3 | 3 | 1 | 2 | 0 | 33.33 | PR patient on treatment for 20 months |
|  | 80 mg | 39 | 39 | 33 | 21 | 12 | 0 | 63.64 |  |
|  | 120 mg | 39 | 29 | 12 | 6 | 5 | 1 | 50.00 |  |
|  | 180 mg | 3+3 | 3 | 2 | 2 | 0 | 0 | 100.00 |  |
| Subtotal |  |  | 74 | 50 | 30 | 19 | 1 | 60.00 |  |
| First-line | 80 mg | ≥30 | 37 | 28 | 20 | 8 | 0 | 71.43 |  |

## Clinical Safety Summary

Tolerability testing has been completed for the 40 mg, 80 mg, 120 mg, and 180 mg dose groups, while the dose-expansion trials for the 80 mg and 120 mg groups are ongoing. The safety results to date are summarized as follows:

No DLTs were observed in the 40 mg, 80 mg, or 120 mg groups, and tolerability and safety were favorable.

The 40–120 mg dose range was generally well-tolerated, with mild adverse reactions. The most common adverse reactions included rash, diarrhea, elevated ALT, elevated AST, elevated triglycerides, and decreased platelet count, all of which were Grade 1/2 in severity. No drug-related Grade 3 or higher adverse reactions have been observed.

In the 180 mg tolerability test, except for one subject who experienced elevated ALT (CTCAE Grade 3, DLT) and withdrew from the trial, the remaining two subjects showed good tolerability with no drug-related Grade 3 or higher adverse reactions and continue treatment. The observed adverse reactions were similar to those in lower-dose groups, primarily including diarrhea, constipation, paronychia, and decreased platelet count, all of which were Grade 1/2.

## Study Objective

## 3.1 Primary Objective

To evaluate the efficacy of FHND9041 versus Afatinib as first-line treatment in patients with EGFR mutation-positive (EGFRm+) locally advanced or metastatic non-small cell lung cancer (NSCLC). The primary endpoint is Progression-Free Survival (PFS) assessed by Blinded Independent Central Review (BICR).

## 3.2 Secondary Objective

1. To evaluate other efficacy endpoints of FHND9041 compared with Afatinib as first-line treatment for locally advanced or metastatic EGFRm+ NSCLC, including:
   - Investigator-assessed PFS
   - Objective response rate (ORR)
   - Overall survival (OS)
   - Duration of response (DoR)
   - Disease control rate (DCR)
   - Depth of response (DepOR)
   - Intracranial ORR and DoR
   - Quality of life scores (EORTC QLQ-C30/LC13 questionnaire & LCSS)
2. To assess the safety of FHND9041 compared with Afatinib as first-line treatment for locally advanced or metastatic EGFRm+ NSCLC.
3. To conduct a population pharmacokinetic (PPK) study of FHND9041 capsules.

## Study Design

This is a randomized, open-label, positive drug parallel-controlled, multi-center Phase III clinical trial aimed at evaluating the efficacy and safety of FHND9041 compared to Afatinib as first-line treatment for locally advanced or metastatic EGFR mutation-positive (EGFRm+) non-small cell lung cancer (NSCLC). The primary efficacy endpoint is progression-free survival (PFS), along with other efficacy indicators and a population pharmacokinetics study.

The study will recruit EGFR mutation-positive patients (including L858R and/or Exon 19 deletion) who have not received prior treatment for their disease. Eligible subjects will receive the investigational drug until disease progression is confirmed according to RECIST 1.1 criteria, intolerable drug-related toxicities, or other pre-specified treatment termination criteria.

Eligible subjects will be randomized in a 1:1 ratio to either the experimental group or the control group (FHND9041 group: Afatinib group). The FHND9041 group will receive an oral dose of 80 mg once daily, while the Afatinib group will receive an oral dose of 40 mg once daily.

The study consists of three phases: 1. Screening period; 2. Treatment period; 3. Follow-up period. Subjects who provide informed consent and meet the screening criteria will be randomized via a central randomization system to either the experimental or control group and will undergo treatment and evaluation per the study protocol.

Subjects in the experimental group (FHND9041 group) will participate in a population pharmacokinetic (PPK) study. Blood samples (4 mL) will be collected for PPK analysis at the following time points: within 1 hour prior to the first dose, on Day 21 of Cycle 1 (C1D21, window period ±3 days), Day 21 of Cycle 2 (C2D21, window period ±3 days), Day 21 of Cycle 4 (C4D21, window period ±3 days), and on the day of treatment discontinuation.

Subjects will continue treatment until disease progression as defined by RECIST 1.1, intolerable drug-related toxicity, or meeting other predefined treatment termination criteria. Tumor imaging assessments by Blinded Independent Central Review (BICR) will follow RECIST 1.1 criteria (intracranial efficacy will be evaluated using RANO-BM criteria), while investigators will conduct tumor assessments per RECIST 1.1. Evaluations will be performed every 6 weeks (±7 days) for the first 18 cycles and every 9 weeks (±7 days) thereafter until disease progression or subject withdrawal. After disease progression is confirmed, survival follow-up will be conducted every 3 months (±7 days).

## Study Population

## Subject Numbering Rules

- Upon signing informed consent, each subject will be assigned a screening number. The screening numbers for each center will begin from 001 and increase sequentially.
  Example: S|0|1|0|0|3 indicates the 3rd subject screened at site 01.
- Subjects successfully enrolled in the trial will be assigned an enrollment number, which also starts at 001 for each center and increases sequentially.
  Example: E|0|1|0|0|3 indicates the 3rd subject enrolled at site 01.

## Inclusion Criteria

1. Age ≥18 years, regardless of gender;
2. Histologically or cytologically confirmed locally advanced or metastatic non-small cell lung cancer (NSCLC) (including patients with recurrence after prior surgical treatment or newly diagnosed stage IIIb, IIIc, or IV disease, staged per the AJCC 8th edition criteria);
3. No prior systemic antitumor therapy (e.g., standard chemotherapy, targeted therapy, biologic therapy, or immunotherapy; exceptions include localized treatment for non-target lesions). Patients who received adjuvant or neoadjuvant therapy (chemotherapy, radiotherapy, or other treatments) may enroll if disease progression occurred ≥6 months after completion of treatment;
4. Confirmation by a central laboratory report of tumor tissue harboring one of the two common EGFR-positive mutations sensitive to EGFR-TKI therapy: exon 19 deletion or L858R;
5. At least one measurable tumor lesion at baseline meeting the following criteria:
   ① Not previously irradiated or used for screening biopsy (if the subject has only one measurable lesion, baseline imaging must be performed ≥7 days after biopsy);
   ② Accurately measurable with a longest diameter ≥10 mm (lymph nodes must have a short axis ≥15 mm);
   ③ Detectable by CT or MRI, with consistent imaging modality used for subsequent evaluations;
6. ECOG performance status of 0–1 (Eastern Cooperative Oncology Group);
7. Life expectancy ≥3 months;
8. Negative serum pregnancy test for all women of childbearing potential. Male and female subjects of reproductive potential must agree to remain abstinent or use highly effective contraception throughout the study and for at least 3 months after the last dose of the investigational drug;
9. Subjects must demonstrate adequate comprehension of the study’s purpose and procedures, commit to protocol compliance and follow-up visits, voluntarily participate, and sign a written informed consent form.

## Exclusion Criteria

1. Received any of the following prior treatments:
   ① Major surgery within 28 days before the first dose of the investigational drug (major surgery refers to Grade 3 and 4 procedures as defined by the *Clinical Application Management of Medical Technologies* implemented on May 1, 2009);
   ② Radiation therapy involving ≥30% of the bone marrow area or extensive radiotherapy within 28 days before the first dose of the investigational drug;
   ③ Local radiotherapy or palliative radiotherapy for bone metastases within 14 days before the first dose of the investigational drug;
   ④ Use of potent CYP3A4 inhibitors or inducers within 7 days before the first dose, or subjects requiring continued use of these drugs during the study;
   ⑤ Use of Chinese herbal medicines or proprietary Chinese medicinal products with antitumor indications within 7 days before the first dose, or subjects requiring continued use of these drugs during the study;
   ⑥ Ongoing treatment with drugs known to prolong QTc intervals or potentially induce torsades de pointes ventricular tachycardia, which must be continued during the study;
2. Presence of unresolved ≥Grade 2 toxicities (per NCI-CTCAE v5.0 criteria) related to prior therapies at the start of study treatment (excluding alopecia and Grade 2 neuropathy caused by platinum-based drugs);
3. Subjects with spinal cord compression or brain metastases (excluding those who are asymptomatic, stable, and have not required steroid treatment for at least 4 weeks prior to study treatment; subjects who received local radiotherapy for brain metastases must have stable symptoms for ≥28 days post-radiotherapy to enroll);
4. Clinical evidence of severe or uncontrolled systemic diseases (e.g., drug-uncontrolled hypertension, active bleeding disorders) deemed by the investigator to render the subject unsuitable for the trial or to compromise protocol compliance;
5. Active infections requiring medication, such as HBV (HBsAg-positive with HBV-DNA >1000 copies/ml or 200 IU/ml and AST/ALT >2.0×ULN), HCV (HCV antibody-positive with HCV-RNA ≥1000 IU/mL), HIV, or syphilis;
6. Clinically significant gastrointestinal dysfunction affecting drug intake, transport, or absorption, including: inability to take oral medication, uncontrolled nausea/vomiting, extensive gastrointestinal resection, unresolved recurrent diarrhea, chronic gastric conditions requiring proton pump inhibitors (PPIs), Crohn’s disease, or ulcerative colitis;
7. Any of the following cardiac criteria:
   ① Mean QTcF interval >450 ms (male) or >470 ms (female) based on triplicate resting ECGs;
   ② Clinically significant arrhythmias, conduction abnormalities, or ECG abnormalities (e.g., complete left bundle branch block, third-degree AV block, type II second-degree AV block, PR interval >250 ms, myocardial infarction within 6 months);
   ③ Risk factors for QTc prolongation or arrhythmias (e.g., heart failure, moderate/severe hypokalemia, congenital long QT syndrome, family history of long QT syndrome, sudden unexplained death in first-degree relatives aged <40 years, concomitant QTc-prolonging drugs);
   ④ Left ventricular ejection fraction (LVEF) ≤50%;
8. History of interstitial lung disease (ILD), drug-induced ILD, steroid-requiring radiation pneumonitis, or clinically active ILD;
9. Inadequate bone marrow reserve or organ function, meeting any laboratory criteria below (without transfusion, blood products, G-CSF, or hematopoietic stimulants within 2 weeks prior to screening):
   ① Absolute neutrophil count <1.5×10⁹/L;
   ② Platelet count <90×10⁹/L;
   ③ Hemoglobin <90 g/L;
   ④ ALT/AST >2.5×ULN (>5×ULN if liver metastases present);
   ⑤ Total bilirubin >1.5×ULN (>3×ULN for Gilbert’s syndrome or liver metastases);
   ⑥ Creatinine >1.5×ULN with creatinine clearance <50 mL/min (measured or calculated via Cockcroft–Gault formula; required only if creatinine >1.5×ULN);
10. History of hypersensitivity to the investigational drug’s active/inactive components, structurally similar drugs, or drugs of the same class;
11. Pregnant or lactating women;
12. Concurrent malignancy or history of other malignancies within 5 years (excluding cured cervical carcinoma in situ, basal/squamous cell skin cancer, or papillary thyroid carcinoma);
13. Severe or uncontrolled ocular conditions judged by the investigator to increase safety risks;
14. Investigator-determined unsuitability for the study.

## Randomization

Subjects who meet the inclusion and exclusion criteria will be randomized through the system in a 1:1 ratio to either the experimental group (FHND9041) or the control group (Afatinib).

Stratification factors for randomization:

- Mutation type (L858R mutation vs Exon 19 deletion)
- Presence or absence of brain metastasis (yes vs no)

## Subject Withdrawal and Treatment Termination Criteria

According to GCP and ICH guidelines, subjects may voluntarily withdraw from the study at any time without discrimination, retaliation, or affecting medical care. Additionally, the investigator may request withdrawal or termination of treatment if any of the following occur:

- Disease progression based on RECIST 1.1, as confirmed by BICR.
- Intolerable toxic reactions or treatment delay due to adverse reactions for more than 4 weeks.
- Noncompliance with the study protocol.
- Pregnancy.
- Withdrawal of informed consent.
- Loss to follow-up.
- Death.
- Study termination by the sponsor.
- Other reasons deemed necessary by the investigator.

If a subject withdraws from the study for any reason, the reason for withdrawal should be documented in the original medical records. Investigators should make every effort to persuade the subject to undergo a series of evaluations during the end-of-treatment visit and follow up on any unresolved adverse events (AEs) until the AE resolves, stabilizes, or the subject is lost to follow-up.

## 6. Study Visit

## 6.1 Visit Process

## 6.1.1 Screening Visit

During the screening visit, the following processes must be completed:

- Voluntary signing of informed consent.
- Verification of inclusion and exclusion criteria.
- Collection of demographic data, including date of birth, age, gender, height, weight, family history, allergy history, personal history (e.g., smoking, drinking).
- Medical /surgical history: diagnosis, first diagnosis date, current status, treatment date, and current medication.
- Tumor treatment history: type of tumor (initial diagnosis), diagnosis date, staging, screening staging, histological/pathological examinations, previous tumor treatments (including chemotherapy, immunotherapy, biologic therapy, steroids, surgery, etc.), drugs or biologics used, treatment start and end dates, and response to treatment.
- Confirmation of tumor/ tissue samples by center laboratory testing of two common EGFR-positive mutations (Exon 19 deletion or L858R) that are sensitive to EGFR-TKI therapy. Tumor tissue samples cannot be from radiation-treated tumor foci; neoplastic foci after local treatment may be used. The Center laboratory test report confirms that the tumor (tissue sample) has one of the 2 common EGFR-positive gene mutations that are sensitive to EGFR-TKI therapy, i.e., including exon 19 deletion or L858R (the tissue sent for testing must not have originated from radiation-treated tumor foci; neoplastic foci after local treatment may be used).
- Past medication history: all medications taken within 30 days before the first dose of the investigational drug, including ongoing medications.
- Vital signs: temperature, respiration, pulse, and blood pressure.
- Physical examination: height and weight.
- 12-lead ECG: must be taken after the subject has rested in a supine position at each time point. If the QTcF interval is prolonged (>500 msec), an additional 3 ECGs (5-minute intervals) should be taken to assess the average QTcF value.
- Echocardiogram.
- Serum pregnancy test for women of childbearing potential (urine pregnancy tests are not accepted).
- Laboratory tests: including complete blood count, blood chemistry, coagulation function, and urinalysis.
- Fasting tests for hepatitis B surface antigen (HBsAg), HCV antibodies, and HIV antibodies.
- ECOG performance status.
- Clinical disease progression evaluation: based on the investigator's assessment of symptoms, signs, and laboratory test results.
- Imaging assessments (CT/MRI/radiology) for tumor evaluation:
- Patients with bone lesions must have a bone scan at baseline.
- Patients with a history of CNS metastasis must undergo a brain scan (e.g., MRI) within 28 days prior to randomization, even if there are no changes in symptoms, to assess disease stability.
- Randomization as required.

## 6.1.2 Treatment Period Visit

**FHND9041 Capsules** (specification: 20 mg/capsule and 80 mg/capsule; starting dose: 80 mg/day, once daily, oral administration)

- Cycle 1: 24 days of medication dispensed (including 3 additional days for the window period). At the C1D21 visit, 24 days of medication for Cycle 2 will be dispensed (including 3 additional days for the window period). From the C2D21 visit to the C18D21 visit, 48 days of medication (including 6 additional days for the window period) will be dispensed every 6 weeks. After the C18D21 visit, 72 days of medication (including 9 additional days for the window period) will be dispensed every 9 weeks.

**Afatinib Maleate Tablets** (specification: 30 mg/tablet and 40 mg/tablet; starting dose: 40 mg/day, once daily, oral administration)

- Cycle 1: 28 days of medication dispensed (including 7 additional days for the window period). At the C1D21 visit, 28 days of medication for Cycle 2 will be dispensed (including 7 additional days for the window period). From the C2D21 visit to the C18D21 visit, 49 days of medication (including 7 additional days for the window period) will be dispensed every 6 weeks. After the C18D21 visit, 70 days of medication (including 7 additional days for the window period) will be dispensed every 9 weeks.
- Subjects participating in the study and receiving FHND9041 will undergo population pharmacokinetic (PPK) studies. Venous blood samples (4 mL) will be collected for PPK analysis at the following time points: within 1 hour prior to randomization, Day 21 of Cycle 1 (C1D21, window period ±3 days), Day 21 of Cycle 2 (C2D21, window period ±3 days), Day 21 of Cycle 4 (C4D21, window period ±3 days), and on the day of treatment discontinuation.

**Day 21 of Dosing**

- Measure vital signs, including respiration, temperature, heart rate, and blood pressure.
- Perform a physical examination, including body weight measurement.
- Conduct routine laboratory tests: complete blood count, urinalysis, blood biochemistry (liver/kidney function, electrolytes, blood glucose, lipids).
- 12-lead electrocardiogram (ECG).
- Dispense investigational drugs.
- Assess medication adherence.
- Record adverse events.
- Collect information on concomitant medications.

Subjects will continue treatment until disease progression as defined by RECIST 1.1, intolerable drug-related toxicity, or meeting other predefined criteria for discontinuation of the investigational drug. Blinded Independent Central Review (BICR) will conduct tumor imaging assessments using RECIST 1.1 criteria (intracranial efficacy evaluated using RANO-BM criteria), while investigators will perform tumor assessments per RECIST 1.1. Evaluations will be repeated until objective disease progression is confirmed, the subject withdraws from the study, or per post-progression protocols (see study flowchart for details). After confirmed disease progression, survival follow-up will be conducted every 3 months (±7 days).

## 6.1.3 Follow-up Period

Any subject who withdraws from the study treatment for reasons other than disease progression (except for withdrawal of informed consent) should undergo tumor assessment as per the visit flowchart, and record the tumor treatment after the last visit. If the subject receives other anti-tumor treatments or medications, that treatment method should be recorded, but no further tumor efficacy evaluation will be performed. Survival follow-up will start every 3 months (±7 days) until the death of the subjects.

## 6.1.4 Unscheduled Visits

Subjects may require unscheduled follow-up visits due to adverse events (AEs) during the trial. These visits will include documentation of the following:

1. Follow-up on AEs;
2. Recording of concomitant medications;
3. Documentation of relevant tests performed (including imaging studies, if applicable).

## 6.2 Efficacy Evaluation

The efficacy of the study will be evaluated based on the RECIST 1.1 standard. The primary endpoint efficacy analysis will be based on the results of independent radiologic assessments. Tumor assessment results from the study centers will be judged by the investigator. Imaging evaluations should be strictly followed according to the schedule, regardless of treatment delays.

## 6.2.1 Imaging Evaluation

At baseline, enhanced CT/MRI scans of the neck, chest, abdomen, pelvis, and head, bone scans, and other appropriate evaluations (as clinically indicated) will be performed to assess all lesions. Baseline CT/MRI scans may be conducted up to 28 days prior to the first dose, and bone scans may be performed up to 3 months prior to the first dose. For subjects without baseline brain metastases, head (CT/MRI) scans will be performed every 24 weeks (±7 days) starting from C1D1 during the treatment period. If the scheduled scan falls between two visits, it will be conducted during the subsequent follow-up. For subjects with baseline bone metastases, bone scans will be repeated every 24 weeks (±7 days) starting from C1D1 during the treatment period. If the scheduled scan falls between two visits, it will be conducted during the subsequent follow-up. For subjects without baseline bone metastases, bone scans will be performed only if bone metastasis is suspected by the investigator.

Imaging evaluations during the treatment period will be conducted every 6 weeks (±7 days) for the first 18 cycles and every 9 weeks (±7 days) thereafter, starting from C1D1, until disease progression, sponsor termination of the study, loss to follow-up, death, or whichever occurs first. This schedule will not be altered due to treatment interruptions. Additional imaging of any suspected new lesions should also be performed.

Subject enrollment and disease progression must be confirmed by independent central imaging review.

If a subject discontinues treatment for reasons other than disease progression (excluding withdrawal of informed consent), imaging evaluations will continue as per the original schedule: every 6 weeks (±7 days) for the first 18 cycles and every 9 weeks (±7 days) thereafter, starting from C1D1, until disease progression, sponsor termination, loss to follow-up, initiation of new antitumor therapy, death, or whichever occurs first.

Imaging should be performed whenever disease progression is suspected (e.g., symptom deterioration). Objective tumor assessments based on tumor response criteria will determine the antitumor activity of the investigational drug. Contrast-enhanced CT or MRI must be used unless contraindicated. The same imaging modality must be used throughout the study for tumor assessments. PET or ultrasound cannot replace CT for tumor assessments but may assist in evaluations if necessary.

If the interval between two imaging assessments is less than 28 days, the investigator may waive the subsequent assessment based on comprehensive evaluation.

## 6.2.2 Independent Imaging Evaluation

The results of independent imaging centers will determine subject inclusion and disease progression for the study.
Each research center will perform imaging examinations according to a unified method and send all imaging scans to the sponsor's designated imaging center for independent evaluation. The specific procedures for independent imaging evaluation will follow the SOP provided by the central imaging unit.
Both the research centers and the central imaging unit will assess baseline imaging and treatment efficacy according to RECIST 1.1 standards (with intracranial efficacy evaluated by the RANO-BM standard).

## 6.2.3 Quality of Life Assessment

Health-related quality of life will be assessed using the EQ-5D-C30/LC13 QOL questionnaire and the LCSS scoring standard.

## 6.3 Safety Evaluation

The safety evaluation includes the incidence of adverse events (AE), treatment-emergent adverse events (TEAEs), and serious adverse events (SAEs) based on the NCI-CTCAE 5.0 standards. The investigator will assess the correlation of AE with the investigational drug.

## 6.3.1 Vital Signs

Vital signs include temperature, pulse, seated blood pressure, and respiration rate. Before measuring vital signs, the subject should rest for at least 5 minutes, and blood pressure should be measured on the same arm each time. During the study, the investigator may increase the frequency of vital sign assessments as needed, particularly for safety reasons.

## 6.3.2 Physical Examination

A complete physical examination must be performed from the baseline period through the end-of-treatment visit. The complete physical examination includes general condition, skin and mucous membranes, superficial lymph nodes, head and organs, neck, chest, abdomen, rectum/anus and external genitalia, spine and extremities, nervous system, and other relevant areas. Body weight (kg) must be measured during the physical examination. Investigators may perform additional examinations as clinically indicated, and any clinically significant findings must be recorded in the eCRF.

## 6.3.3 ECOG Performance Status

Performance status will be assessed using the ECOG scale (see Appendix).

## 6.3.4 Laboratory Tests

All laboratory test results must be recorded in the eCRF, especially clinically significant abnormal results (e.g., those requiring dose adjustments, treatment interruption, delays, clinical symptoms, or signs). When abnormal test results are considered adverse events, they should be recorded in the AE section of the eCRF.

## 6.3.5 ECG Examination

A 12-lead ECG should be performed with the subject lying in a resting position. The following parameters should be recorded: heart rate, PR interval, QRS interval, uncorrected QT interval, Fridericia-corrected QTc, and RR interval. If the QTcF interval exceeds 500 msec, ECG should be performed continuously for 3 more times (at intervals of 5 minutes), and the average of these 3 QTcF readings should be calculated.

If clinically indicated or when clinical judgment is difficult, additional ECGs may be performed. Only clinically significant abnormalities need to be recorded in the AE form. Any clinically significant ECG abnormalities at baseline/screening must be recorded in the corresponding eCRF page.

## 6.4 Population Pharmacokinetic (PPK) Study

To further evaluate the exposure of FHND9041 capsules in the body, blood samples will be collected from all subjects taking FHND9041 capsules for the population pharmacokinetics (PPK) analysis. The blood collection time points are as follows:

- Pre-dose (baseline)
- Cycle 1, Day 21 (C1D21, with a window of ±3 days)
- Cycle 2, Day 21 (C2D21, with a window of ±3 days)
- Cycle 4, Day 21 (C4D21, with a window of ±3 days)
- Pre-dose on the last day of treatment

At each blood collection time point (see Table 6-1), 4 mL of venous blood should be collected into a K2-EDTA vacuum blood collection tube, mixed manually, and centrifuged within 30 minutes under the following conditions: 3000 rpm, 4°C for 10 minutes. After centrifugation, the plasma should be aliquoted into two labeled 2 mL cryovials and stored at -60°C to -90°C until shipment to the pharmacokinetic analysis facility, or stored at -20°C or lower and shipped to the pharmacokinetic facility within 14 days after collection.

**Table 6-1 PK Sample Collection Schedule**

| **Cycle** | **Day N** | **Time** | **Administration** |
| --- | --- | --- | --- |
| Baseline | - | - | Pre-dose |
| C1 | 21 | 0h | Pre-dose |
| C2 | 21 | 0h | Pre-dose |
| C4 | 21 | 0h | Pre-dose |
| - | End of Study | 0h | Pre-dose |

## 7. Investigational Drug

## 7.1 Overview to Investigational Drugs

| **Drug Name** | **FHND9041 Capsule** | **Afatinib Maleate Tablets** |
| --- | --- | --- |
| Dosage Form | Capsule | Tablet |
| Specification | 20mg, 80mg | 30mg, 40mg |
| Manufacturer | Jiangsu Huayang Pharmaceutical Co., Ltd. | Qilu Pharmaceutical Co., Ltd. |
| Sponsor | Jiangsu Chuangte Pharmaceutical Technology Co., Ltd. | Jiangsu Chuangte Pharmaceutical Technology Co., Ltd. |
| Storage | Store in a sealed container in a dry place | Store at or below 25°C |

## 7.2 Dosage Regime

- **Experimental Group:** FHND9041 Capsule; the starting dose is 80mg, once daily, taken on an empty stomach (at least 1 hour before or 2 hours after a meal). Each cycle is 21 days, continued until disease progression or intolerable adverse reactions occur.
- **Control Group:** Afatinib Maleate Tablets; the starting dose is 40mg, once daily, on an empty stomach (at least 1 hour before or 2 hours after a meal). The tablet should be swallowed whole with water. Each cycle is 21 days, continued until disease progression or intolerable adverse reactions occur.

Subjects in both the experimental and control groups should take the medication at approximately the same time each day. Dose adjustments may be made if necessary (see "Dose Adjustment Guidelines" for details). The actual administration time should be recorded in the clinical source documents.

Treatment will continue until the subject experiences disease progression, intolerable toxicity, the investigator or subject decides to discontinue treatment, new anti-tumor therapy is initiated, or death occurs, whichever comes first.

## 7.3 Medication Compliance

The dose and administration time of the investigational drug for each subject should be recorded in the eCRF. Reasons for delayed administration, dose reduction, or missed doses should also be recorded in the eCRF. Subject compliance will be monitored using the subject’s medication diary card and the eCRF.

Poor compliance is defined as the actual total medication taken by the subject being <80% or >120% of the prescribed total medication.

## 7.4 Handling of Missed Dose

1. If it is uncertain whether the medication was taken on a given day, it should be assumed that the medication was taken, and no additional dose should be taken that day.
2. If a missed dose is confirmed, the missed dose should be taken as soon as possible, provided that it is at least 12 hours before the next scheduled dose. If the time to the next dose is less than 12 hours, the missed dose should not be taken, and the subject should take the prescribed dose at the next scheduled time.
3. If vomiting occurs after taking the medication, no additional dose should be taken that day. The prescribed dose should be taken at the next scheduled time. The daily medication time and dose should be accurately recorded in the medication diary card.

## 7.5 Packaging and Labeling

The investigational drug is produced by the sponsor under GMP-compliant conditions. The drug packaging box must be affixed with a label containing basic drug information such as drug name, specification, usage and dosage, storage conditions, and manufacturer, along with the statement "For clinical research use only."

The comparator drug, Afatinib Maleate Tablets, is purchased from the market. The drug packaging box must be affixed with a label containing basic drug information such as drug name, specification, usage and dosage, storage conditions, and manufacturer, along with the statement "For clinical research use only."

**Clinical Approval Number: XXXXXXX** **Drug Number:**
**FHND9041 Capsule**
(For clinical research use only)

- **Batch Number:** XXXXXX
- **Production Date:** XXXXXX
- **Expiration Date:** XXXXXX
- **Specification:** 80mg, 4 capsules/blister, 2 blisters/box
- **Usage and Dosage:** Oral, as prescribed by the physician
- **Storage Conditions:** Store in a sealed container in a dry place
- **Manufacturer:** Jiangsu Huayang Pharmaceutical Co., Ltd.
- **Supplier:** Jiangsu Chuangte Pharmaceutical Technology Co., Ltd.

**Clinical Approval Number: XXXXXXX Drug Number:**
**Afatinib Maleate Tablets**
(For clinical research use only)

- **Batch Number:** XXXXXXX
- **Production Date:** XXXXXXX
- **Expiration Date:** XXXXXXX
- **Specification:** 40mg, 7 tablets/box
- **Usage and Dosage:** Oral, as prescribed by the physician
- **Storage Conditions:** Store at or below 25°C, keep out of reach of children
- **Manufacturer:** Qilu Pharmaceutical Co., Ltd.
- **Supplier:** Nanjing Chuangte Pharmaceutical Technology Co., Ltd.

## 7.6 Preparation/Handling/Storage/Responsibilities

## Drug Delivery and Receipt

The investigational drugs are shipped and delivered by the sponsor. The research unit designates personnel to receive, record, and store the drugs. All investigational drugs must be stored in a secure and compliant location, with environmental conditions (temperature and humidity) monitored and recorded.

Clinical researchers must ensure that all investigational drugs are used only for subjects participating in the clinical trial. The dosage and administration must follow the trial protocol, and the drugs must not be transferred to any non-trial participants.

## Drug Dispensing, Inventory, and Recovery

To ensure drug safety, the investigational drugs are managed by designated personnel. Detailed records must be kept for drug dispensing and returns. The clinical monitor appointed by the sponsor oversees the supply, use, and storage of the investigational drugs.

The investigational drugs will be delivered to the clinical research center according to storage and transportation requirements and stored accordingly. The sponsor-provided investigational drugs, including used or empty drug containers and documentation, must be verified by the clinical monitor. At the end of the study, the monitor will verify the drug quantities. All unused drugs and empty containers must be returned to the sponsor or a third party designated by the sponsor.

## Concomitant Medications

Concomitant medications include any drugs taken by the subject from the signing of the informed consent form until 28 days after the last dose (including symptomatic treatment information). These must be recorded in the subject's medical records and collected in the eCRF.

Permitted Concomitant Medications in This Study:
Supportive treatments for underlying diseases, such as diabetes management, antihypertensive drugs, analgesics, antibiotics, etc., are allowed based on standard practices and clinical judgment. These treatments must be recorded in the eCRF. For subjects with bone metastases, the investigator may decide to administer bisphosphonates or palliative radiotherapy according to local medical practices.

During the study, subjects must promptly inform the investigator of any additional treatments. All concomitant medication information (generic name, purpose, dosage, duration, etc.) must be recorded in detail in the eCRF.

Prohibited Concomitant Medications in This Study:

- Strong CYP3A Inhibitors: Including but not limited to atazanavir, clarithromycin, indinavir, itraconazole, ketoconazole, nefazodone, nelfinavir, ritonavir, saquinavir, telithromycin, troleandomycin, voriconazole, grapefruit, and grapefruit juice.
- Strong CYP3A Inducers: Including but not limited to carbamazepine, phenobarbital, phenytoin, rifabutin, rifampin, and St. John's wort.
- Narrow Therapeutic Index CYP3A Substrates: Including but not limited to alfentanil, cyclosporine, dihydroergotamine, ergotamine, fentanyl, pimozide, quinidine, sirolimus, and tacrolimus.

Prohibited Concomitant Use of Drugs Known to Prolong QT Interval
See Table 7-1 below.

Table 7-1 Drugs Known to Prolong QT Interval

| Drugs Known to Prolong QT Interval | Washout Period Before FHND9041 Use |
| --- | --- |
| Clarithromycin, Droperidol, Erythromycin, Procainamide | 2 days |
| Cisapride, Disopyramide, Dofetilide, Domperidone, Ibutilide, Quinidine, Sotalol, Sparfloxacin, Thioridazine | 7 days |
| Bepridil, Chlorpromazine, Halofantrine, Haloperidol, Mesoridazine | 14 days |
| Levomethadone, Methadone, Pimozide | 4 weeks |
| Arsenic Trioxide | 6 weeks |
| Pentamidine | 8 weeks |
| Amiodarone, Chloroquine | 1 year |

Other concomitant medications deemed unsuitable by the investigator.

## Dose Adjustment Guidelines

In the event of toxicity, the investigator will adjust the dose or suspend administration according to Table 8-1 and initiate supportive treatment. Suspension of administration does not affect tumor evaluation time points. If a subject undergoes dose reduction, the dose cannot be increased in subsequent treatment cycles. All interruptions or changes in medication must be recorded in the original medical records.

**Table 8-1 Dose Reduction Table**

| **Dose Adjustment** | **FHND9041 Capsule** | **Afatinib Maleate Tablets** |
| --- | --- | --- |
| Maintain Starting Dose | 80mg QD | 40mg QD |
| First Dose Reduction | 40mg QD | 30mg QD |
| Permanent Discontinuation | - | - |

**Dose Adjustment Rules for Drug-Related Hepatotoxicity**
See Table 8-2 below.

**Table 8-2 Dose Adjustment Guidelines for Drug-Related Hepatotoxicity**

| **Toxicity Level** | **Investigational Drug Dose Adjustment** |
| --- | --- |
| ALT or AST >5x ULN; Total Bilirubin ≤2x ULN | Suspend medication until ALT/AST returns to baseline or ≤3x ULN, then resume with a dose reduction. |
| ALT or AST >3x ULN; Total Bilirubin >2x ULN (without cholestasis or hemolysis) | Permanent discontinuation. |

**Dose Adjustment Rules for Other Drug-Related Toxicities**
See Table 8-3 below.

**Table 8-3 Dose Adjustment Guidelines for Other Drug-Related Toxicities**

| **Toxicity Level** | **Investigational Drug Dose Adjustment** |
| --- | --- |
| Grade 1 or 2 | Maintain current dose |
| Grade 3, toxicity ≤28 days and recovery to ≤Grade 2/baseline | Suspend, reduce, or permanently discontinue |
| Grade 3, toxicity persists >28 days without recovery to ≤Grade 2/baseline | Permanent discontinuation |
| Grade 4 | Reduce dose or permanently discontinue |

**Table 8-4 Dose Adjustment Guidelines for Drug-Related Interstitial Lung Disease**

| **Toxicity Level** | **Investigational Drug Dose Adjustment** |
| --- | --- |
| New pulmonary symptoms | Reduce dose |
| New pulmonary symptoms not resolved after dose reduction; or worsening; or combination of symptoms: dyspnea or shortness of breath, cough, fever; or suspected interstitial lung disease pending diagnosis | Suspend medication |
| Symptoms not resolved to baseline after 14 days of discontinuation | Permanent discontinuation |

**Dose Adjustment Principles:**

1. For Grade 2 AEs, the investigator will provide supportive treatment according to CTCAE 5.0 standards.
2. **Controllable and Reversible:**
   - For Grade 3 AEs, suspend treatment until recovery to ≤Grade 2/baseline, then resume at the original dose. If it recurs, suspend until recovery to ≤Grade 2/baseline, reduce the dose by one level, and continue until the minimum dose is reached. If it persists, permanently discontinue.
   - For Grade 4 AEs, reduce the dose by one level upon first occurrence. If it recurs, permanently discontinue.
3. **Uncontrollable and Irreversible:**
   - For Grade 3-4 AEs persisting for more than 28 days without recovery to ≤Grade 2/baseline, permanently discontinue.

## 9 Clinical Assessments

## 9.1 Efficacy Evaluation Endpoints

## 9.1.1 Primary Efficacy Endpoints

Progression-Free Survival (PFS) assessed by Blinded Independent Central Review (BICR) per RECIST 1.1 criteria, with intracranial efficacy evaluated using the RANO-BM (Response Assessment in Neuro-Oncology Brain Metastases) criteria.

## Secondary Efficacy Endpoints

1. Investigator-assessed PFS;
2. Objective response rate(ORR);
3. Overall survival(OS);
4. Duration of response(DoR);
5. Disease control rate(DCR);
6. Depth of Response(DepOR)
7. Intracranial ORR and DoR;
8. Quality of Life (QoL) scores using the EORTC QLQ-C30/LC13 QOL questionnaires and Lung Cancer Symptom Scale (LCSS).
9. Population pharmacokinetic analysis(PopPK).

## Safety Evaluation Endpoints

Incidence of adverse events graded per NCI-CTCAE v5.0 criteria, including: adverse events(AE),serious adverse events(SAE),and Suspected Unexpected Serious Adverse Reactions (SUSARs) ,are determined by the investigators to determine the relevance of the trial drug.

EORTC QLQ-C30/LC13: European Organization for Research and Treatment of Cancer Quality of Life Questionnaire Core 30 and Lung Cancer Module 13


## Adverse Events

## Definition of Adverse Events

Adverse events(AEs)refer to adverse medical events that occur after participants take the investigational drug, which may manifest as symptoms, signs, diseases, or laboratory abnormalities, but are not necessarily causally related to the treatment. Abnormal laboratory findings qualify as AEs only if they result in signs and symptoms that are clinically significant or require clinical treatment.

Definite symptoms or signs of tumor progression should not be recorded as adverse events unless they are more severe than expected or deemed by the investigator to be related to the investigational drug or study procedures. If a new primary malignancy occurs, the event is considered an adverse event.

## Definition of Serious Adverse Events

A Serious Adverse Event (SAE) is an AE meeting at least one of the following criteria:

Results in death; Life-threatening (imminent risk of death at the time of the event, not based on hypothetical progression); Resulting in hospitalization or prolonged hospitalization; Permanent or significant loss of function; Teratogenic and birth defects;

Other medically significant events: Medical and scientific judgment must be used to determine whether to expedite reporting for other situations. For example, medically significant events may not be immediately threatening to life, death or hospitalization, but may necessitate medical intervention to prevent the occurrence of one of the above situations.

## Tumor Progression

Definitive symptoms or signs of tumor progression in this trial should not be recorded as adverse events unless the investigator considers the tumor progression to be related to the study drug or study procedures. If it cannot be determined that the symptoms are entirely due to the progression of the underlying malignancy, or if the symptoms do not align with the expected manifestations of disease progression, such clinical symptoms should be reported as AEs.

Some subjects may experience clinical deterioration. In such cases, the subject’s clinical symptoms clearly indicate disease progression, but there is no supporting evidence of changes in tumor size; or the disease progression is sufficiently evident that the investigator may choose not to conduct further assessments. In these situations, clinical progression will be determined based on symptom deterioration. These instances of symptom deterioration should be rare exceptions, and the investigator should make every effort to fully document the objective progression of the underlying malignancy.

If it is uncertain whether an AE is solely caused by the study disease, it should be reported as an AE or SAE. The occurrence of a new primary malignancy should be considered an AE.

## Criteria for Assessing Severity of AE

Investigators must describe the severity of all AEs (Grade 1 to Grade 5) according to the National Cancer Institute Common Terminology Criteria for Adverse Events (CTCAE version 5.0). If an adverse event is determined to be a serious adverse event, the CTCAE grade recorded on the eCRF adverse event page must match the NCI CTCAE grade recorded in the serious adverse event report.

- **Grade 1:** Mild; asymptomatic or mild symptoms; only clinical or diagnostic observations; no intervention required.
- **Grade 2:** Moderate; minimal, local, or non-invasive intervention indicated; limitation in instrumental activities of daily living (e.g., cooking, shopping, using the telephone, managing finances).
- **Grade 3:** Severe or medically significant but not immediately life-threatening; hospitalization or prolongation of hospitalization indicated; disabling; limitation in self-care activities of daily living (e.g., bathing, dressing, eating, toileting, taking medications, but not bedridden).
- **Grade 4:** Life-threatening; urgent intervention required.
- **Grade 5:** Death related to the AE.

Not all AEs include all grades. Therefore, some AEs may have fewer than five grade options. Grade 5 (death) is not applicable to certain AEs and thus is not included.

**Note:** The severity of an adverse event is distinct from its seriousness. A severe adverse event is not necessarily a serious adverse event. For example, a headache may be severe (significantly affecting the subject’s daily function) but is not necessarily a serious adverse event unless it meets one of the seriousness criteria for SAEs.

## Criteria for Assessing the RelationshipBetween AE and Investigational Drugs

Investigators shall comprehensively analyze the specific circumstances of adverse events (AEs) experienced by subjects, including their medical history, concurrent conditions, and concomitant medications, to determine the relationship between AEs and the investigational drug.

The causality assessment between AEs and the drug includes the following considerations:

- Whether there is a plausible temporal relationship between the initiation of the drug and the onset of the suspected AE;
- Whether the suspected AE aligns with the known or expected adverse event profile of the investigational drug;
- Whether the suspected AE improves or resolves upon drug discontinuation or dose reduction;
- Whether the same AE reoccurs upon re-administration of the drug;
- Whether the suspected AE can be explained by the subject’s underlying medical conditions, concomitant medications, concurrent therapies, or prior treatments.

Based on the above criteria, investigators will categorize causality into five levels: definitely related, probably related, possibly related, possibly unrelated, or definitely unrelated. The first three categories (definitely related, probably related, and possibly related) are classified as adverse drug reactions (ADRs). The evaluation criteria are summarized in the following table:

| **Criteria** | **Definitely Related** | **Probably Related** | **Possibly Related** | **Possibly Unrelated** | **Definitely Unrelated** |
| --- | --- | --- | --- | --- | --- |
| Temporal relationship with the investigational product | + | + | + | + | - |
| Known adverse reaction type of the investigational product | + | + | + | - | - |
| Improvement or resolution of AE after discontinuation | + | + | +/- | +/- | - |
| Recurrence of AE upon re-exposure | + | ? | ? | ? | - |
| AE cannot be explained by the subject's underlying condition | + | + | +/- | +/- | - |

**Note:** (1) "+" indicates affirmative; "-" indicates negative; "+/-" indicates uncertain; "?" indicates unknown.

The incidence of adverse reactions is calculated based on the number of cases: Adverse Reaction Rate = (Number of cases with at least one adverse reaction / Total number of cases) × 100%.

## 10.6 Recording of Adverse Events (AEs)

From the signing of informed consent until the first administration of the investigational drug, adverse events (AEs) related to the study treatment must be recorded. All AEs occurring after the participant receives the investigational drug, whether self-reported by the participant, identified by the investigator through inquiry, physical examination, laboratory tests, or other methods, regardless of perceived causality to the investigational drug, must be fully documented in source medical records and electronic Case Report Forms (eCRFs). AE documentation must include, at minimum: name of the event, onset and resolution dates, severity, causality assessment, management measures, and outcome. If concomitant medications are involved, they must be recorded in detail as per the protocol. Both source documentation and AE report forms must use standardized AE and medical terminology for reporting.

## Management and Follow-up of AEs

All AEs, irrespective of their suspected relationship to the investigational drug, must be actively managed. Participants experiencing AEs should receive acceptable clinical interventions. All AEs (including laboratory abnormalities) must be followed up until one of the following criteria is met: （1）The AE resolves or returns to baseline status.；（2） The condition stabilizes；（3） A reasonable explanation is established (e.g., the event is attributable to a non-study drug or unrelated to study procedures)；（4）No further information can be obtained (e.g., participant refusal to provide additional details or confirmed lost to follow-up despite best efforts).(5) Participant death.

## Reporting and Management of SAE

Upon becoming aware of a Serious Adverse Event (SAE), the investigator should immediately report it in writing to the sponsor, followed by a detailed written follow-up report. Upon receiving safety-related information from any source, the sponsor should promptly analyze and assess it, including its severity, relationship to the investigational product, and whether it is an expected event.

For fatal or life-threatening suspected unexpected serious adverse reactions (SUSARs), the sponsor should report to the national drug evaluation agency as soon as possible, but no later than 7 days after first becoming aware, and provide follow-up information within the subsequent 8 days. For non-fatal or non-life-threatening SUSARs, the sponsor should report as soon as possible, but no later than 15 days (with the day of first awareness counted as day 0). The sponsor should promptly report SUSARs to all participating investigators, clinical trial institutions, and ethics committees, and report SUSARs to the drug regulatory authorities and health authorities.

Upon receiving safety-related information from the sponsor, the investigator should promptly acknowledge and review it, consider adjustments to the subject's treatment, communicate with the subject if necessary, and report SUSARs provided by the sponsor to the ethics committee.

SAEs occurring after the end of the clinical trial or follow-up but before the review conclusion is obtained should be reported by the investigator to the sponsor. If they meet the definition of SUSAR, they should also be reported promptly.

**SAE Reporting Channels:**

| **Reporting Entity** | **Contact Number** | **Email** | **Address** |
| --- | --- | --- | --- |
| National Medical Products Administration (NMPA) | 010-68311166 | [yjjdc@nmpa.gov.cn](https://mailto:yjjdc@nmpa.gov.cn/" \t "_blank) | No. 1 Beiluyuan, Xicheng District, Beijing |
| National Health Commission (NHC) | 010-68792201 | [saefax@163.com](https://mailto:saefax@163.com/" \t "_blank) | No. 1 Xizhimenwai South Road, Xicheng District, Beijing |
| Hospital Ethics Committee | -- | -- | -- |
| Nanjing Chuangte Pharmaceutical Technology Co., Ltd. | 025-57033246-8069 | [njct_pv@126.com](https://mailto:njct_pv@126.com/" \t "_blank) | No. 9 Weidi Road, Qixia District, Nanjing, Jiangsu Province |
| Beijing Huashi Kangyuan Pharmaceutical Technology Co., Ltd. | 010-86393480 | [fanlin@huasky-cro.com](https://mailto:fanlin@huasky-cro.com/" \t "_blank) | 27th Floor, Fenglian Plaza, No. 18 Chaoyangmenwai Street, Chaoyang District, Beijing |

## Pregnancy Events

The following situations are considered pregnancy events in the study: a female subject becomes pregnant or is found to be pregnant while receiving the investigational product; or is found to be pregnant after discontinuation of the study (maternal exposure); or a male subject is exposed to the investigational product before and/or during the partner's pregnancy (paternal exposure).

Any subject or their partner who experiences a pregnancy event should immediately notify the investigator. The investigator should promptly complete the Pregnancy Report Form and report it to the sponsor or designated CRO. Follow-up must be conducted for pregnancy events to determine the exact pregnancy outcome. If the pregnancy outcome meets the criteria for a serious adverse event, such as spontaneous abortion, stillbirth, neonatal death, or congenital abnormalities, the investigator should also report it according to the SAE reporting procedures.

## Data Management

This study uses an Electronic Data Capture (EDC) system for data collection and management. The system retains a complete audit trail to ensure the traceability of clinical trial data. The data management process must comply with GCP standards to ensure the authenticity, integrity, and accuracy of clinical trial data.

## Data Management Workflow Diagram


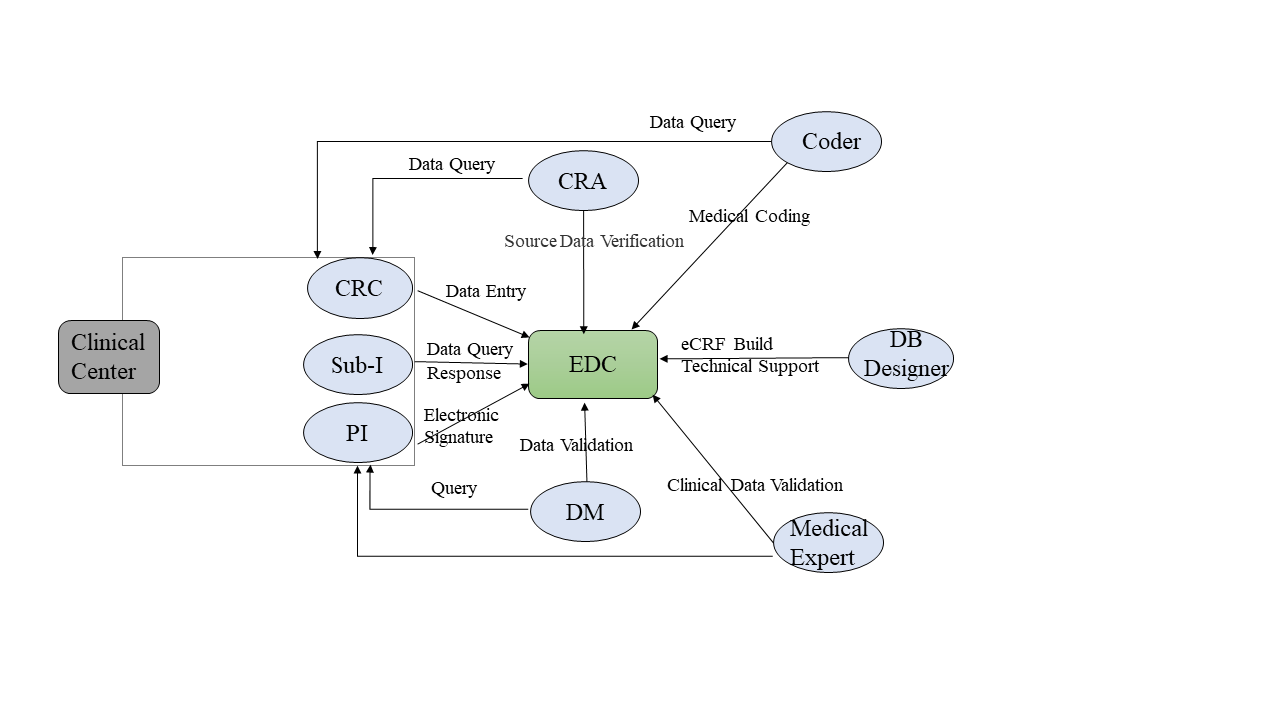


## Roles and Responsibilities in Data Collection

| **Data Collection Role** | **Abbreviation** | **Responsibilities** |
| --- | --- | --- |
| Clinical Research Coordinator | CRC | 1. Data entry; 2. Query resolution |
| Sub-Investigator | Sub-I | 1. Data entry; 2. Query resolution |
| Principal Investigator | PI | 1. Data entry; 2. Query resolution; 3. Approval |
| Clinical Research Associate | CRA | 1. Source data verification (SDV); 2. Query issuance |
| Project Manager | PM | 1. Source data verification (SDV); 2. Query issuance |
| Data Manager | DM | 1. Query issuance; 2. Query review; 3. Data freeze/unfreeze; 4. Data lock |
| Medical Coder | Coder | 1. Coding; 2. Query issuance |

## Database Design and Establishment

The database is designed and established by database designers, following CDISC standards as much as possible. After the database is established and tested, personnel with relevant roles (PI, Sub-I, CRC, PM, CRA, DM, etc.) must be trained before the system can be officially launched.

The data manager writes the Data Management Plan (DMP), which must be finalized and approved before the first subject is enrolled. The DMP should be updated and revised promptly based on actual operations.

## Data Entry

Data should be entered online by the investigator or authorized personnel promptly after each visit. The investigator must approve the data on the eCRF to confirm its authenticity. After data entry, any changes must be explained (comments) and will be automatically recorded in the system.

## Source Data Verification

The monitor logs into the EDC system at the research site and verifies 100% of the eCRF data against the source data. Any discrepancies can be queried online at any time.

## Data Validation

Data managers manage queries based on the Data Validation Plan (DVP). When data is entered into the EDC system, illogical data will trigger automatic queries. These queries must be reviewed and answered by the investigator or authorized personnel. When updated data resolves the query, it will be automatically closed. Data managers can review automatically closed queries and manually add queries if issues remain unresolved.

In addition to automatic queries, queries identified through SAS programming or manual checks by data managers can be manually added to the EDC system for clarification/verification/confirmation by the investigator.

Before database lock, data managers must ensure all queries are resolved, and the investigator must complete electronic signatures in the EDC system to ensure the completeness and accuracy of subject data.

## Medical Coding

Medical coders perform medical coding, including coding for concomitant medications and AEs. AEs are coded according to the MedDRA dictionary (version 24.0 or above), and concomitant medications are classified using WHO ATC.

During coding, if medical terminology is inappropriate, inaccurate, or ambiguous, data managers can issue real-time queries to the investigator.

Medical review of coding must be completed before database lock.

## Data Quality Response

The data is audited before the database is locked and an audit report is given. The EDC system issues queries based on the DVP. CRA, CRC, and PI review the queried data. Data managers issue queries. Monitors perform 100% SDV on data entered into the system. Data is reviewed and an audit report is provided before database lock.

## Data Lock and Unlock

The database lock checklist is completed, and the database lock procedure is followed. Data managers, statisticians, CRA representatives, and investigator representatives sign the database lock approval document. Data managers export the database in the specified format for statistical analysis. If there is definitive evidence to unlock the database after lock, the investigator and relevant personnel must sign the unlock document.

## External Data Management

Blood concentration data is managed as external data. Data transfer requirements are detailed in the External Data Transfer Agreement. Data managers review and verify the consistency of external data.

## eCRF Archive

At the end of the trial, each subject's eCRF is exported as a PDF for electronic archiving. CDs are burned and stored at the clinical trial site for five years after the drug is marketed.

## Statistical Analysis

Statistical analysis will be conducted without stratification by center (combining data from all centers). Efficacy and safety analyses will be performed when 268 PFS events are reached.

Subjects who fail screening will not be included in any analysis and will be reported in a separate list. Reasons for withdrawal will be summarized and listed, including the first and last dose dates, duration of exposure to the investigational drug, withdrawal date, and reason.

## Determination of Sample size

This is a randomized, open-label, active-controlled, multicenter, superiority-designed Phase III clinical study. Assuming a hazard ratio (HR) of 0.71 for FHND9041 versus Afatinib (median PFS of 11 months in the Afatinib group and 15.5 months in the FHND9041 group), with an enrollment ratio of 1:1, a 12-month enrollment period, and a 36-month study period, a sample size of 268 events is required to detect a statistically significant difference in PFS (using Logrank test, calculated with PASS software) with a one-sided α of 0.025 and 80% power. Accounting for a 10% dropout rate, approximately 350 subjects (175 in the experimental group and 175 in the control group) need to be enrolled.

## 12.2 Statistical Analysis Plan

The statistical analysis methods for this study will be further detailed in a separate Statistical Analysis Plan (SAP), which will be reviewed by the sponsor and retained by the sponsor after finalization. The SAP may revise certain aspects of this protocol, but if the revisions involve major and/or critical factors such as endpoint definitions or analyses, they should also be reflected in the protocol amendment.

## 12.3 Statistical Analysis Data Sets

Full Analysis Set (FAS): Based on the intent-to-treat (ITT) principle, the FAS includes all randomized subjects and serves as the primary analysis set for efficacy. The FAS will be used for all efficacy and baseline characteristic analyses. Treatment grouping will be analyzed according to randomization.

Per-Protocol Set (PPS): A subset of the FAS, defined as subjects in the FAS without major protocol deviations. Missing data will not be imputed. This serves as a supplementary analysis set for efficacy evaluation.

Safety Analysis Set (SAS): Includes all enrolled subjects who received at least one dose of the investigational drug and had post-dosing safety records. The SAS will be used for all safety analyses, with treatment grouping analyzed according to actual treatment received.

Population Pharmacokinetic Analysis Set (PPAS): Includes all subjects who participated in pharmacokinetic (PK) sampling, received at least one dose of the investigational drug, and provided at least one evaluable PK sample. This data set will be used for PK analysis.

## 12.4 Statistical Analysis Methods

Baseline data will be analyzed using the FAS. All efficacy indicators will be analyzed using both the FAS and PPS, while safety analyses will be performed using the SAS. PK analyses will use the PPAS.

## 12.4.1 General Principles

Unless otherwise specified, descriptive statistics will be used to summarize the data based on data type. Continuous variables will be summarized using the number of observations (N), mean, standard deviation (SD), median, minimum, and maximum. Categorical and ordinal variables will be summarized using frequencies and percentages. Time-to-event data will be analyzed using Kaplan-Meier estimation to derive median times and 95% confidence intervals (CIs).

Significance Level: For between-group comparisons, all hypothesis tests will be two-sided with a significance level of α = 0.05. Differences with P ≤ 0.05 will be considered statistically significant. All confidence intervals will be set at 95%.

Hypothesis Testing: The primary efficacy endpoint of the trial is PFS assessed by independent imaging evaluation. The comparison between the experimental group and the control group will use the log-rank test:

- Null hypothesis (H0): The PFS hazard ratio (HR) between the experimental and control groups equals 1.
- Alternative hypothesis (H1): The PFS hazard ratio (HR) between the experimental and control groups does not equal 1.
- Significance level (α): Two-sided, 0.05.

## 12.4.2 Demographic Baseline and Treatment Analysis

Demographic and baseline analyses will be based on the FAS and include, but are not limited to:

- Distribution of subjects (randomized, completed, withdrawn) and analysis populations.
- Baseline characteristics (including demographic data, medical history, concomitant medications, and other baseline characteristics).
- Analysis of treatment duration and dosing.
- Analysis of treatment interruptions, dose reductions, and early withdrawals, along with reasons.

Summarizations will be presented in tables and descriptive statistics.

## 12.4.3 Handling of Missing Data

Except for missing dates, missing safety data will not be imputed. Missing time-to-event data, such as PFS, will be handled according to censoring rules, with censoring times calculated. Missing responses for ORR evaluations will be imputed as non-responders. Missing values for patient-reported questionnaires will be imputed using the Last Observation Carried Forward (LOCF) method. Specific imputation and censoring rules will be further detailed in the SAP.

## 12.4.4 Efficacy Analysis

## 12.4.4.1 Main Efficacy Indicators

The main efficacy indicator is progression-free survival(PFS)by independent imaging evaluation,which refers to the time from the date of randomization to the occurrence of disease progression or death from any cause,whichever occurs first.Statistical analysis was mainly based on tumor assessment results obtained by independent imaging in accordance with RECIST 1.1.Analyze simultaneously based on FAS set and PPS set.

PFS was compared between groups using the stratified log-rank test,and the stratification factors were the type of gene mutation and whether there was brain metastasis.The COX proportional hazards model was also used to estimate the HR and its 95%CI between groups.The model considers important covariates such as the type of gene mutation(L858R mutation vs.Exon19del mutation)and whether there is brain metastasis(no vs.yes),and estimates its HR and 95%CI.The Kaplan-Meier method was used to estimate the median PFS and its 95%CI,and draw a survival curve.

At the same time,the log-rank test was also used to analyze PFS without considering stratification factors.In addition,statistical analysis will be performed based on the following subgroup information(specific details will be detailed in the statistical analysis plan):

Gene mutation type(L858R mutation VS Exon19del mutation)

Whether there is brain metastasis(no vs.yes)

Gender(male vs female)

Age(≤65 years old VS>65 years old)

ECOG score(0 points vs.1 points)

…

Censoring rules when calculating PFS will be detailed in the Statistical Analysis Plan(SAP).

## 12.4.4.2 Secondary Efficacy Indicators

Investigator-assessed progression-free survival(PFS):The statistical analysis is mainly based on the tumor assessment results obtained by the investigator in accordance with RECIST 1.1.The statistical analysis method was the same as the main efficacy index.

Overall survival(OS):OS is the time from the date of randomization to death from any cause.If the subject does not die at the end of the trial,it is censored,and the survival time is from the random date to the last follow-up date.The statistical analysis method of OS was the same as the main efficacy indicator.

Objective response rate(ORR)by investigator and independent imaging assessment:ORR refers to the proportion of subjects in each treatment group whose best overall response is CR and PR(CR+PR)according to the results of investigator/independent imaging assessment.Calculate the ratio of ORR and its 95%confidence interval for each group,and calculate the difference in ORR ratio between the two groups and its 95%confidence interval.Stratified CMH test was used to compare differences between treatment groups.

Duration of response(DOR):DOR refers to the time from the first assessment of CR or PR to the first assessment of PD(Progressive Disease)or death from any cause.The statistical analysis method was the same as the main efficacy index.

Depth of response(DepOR):DepOR refers to the percentage reduction in the sum of the maximum tumor diameters after treatment compared with baseline.DepOR can better reflect the degree of tumor shrinkage and treatment efficacy,and different DepOR can better reflect the individual differences in drug effects for different individuals.Stratified CMH test was used to compare differences between treatment groups.

Disease control rate(DCR):Disease control rate(DCR)refers to the proportion of patients whose tumors shrink or remain stable for a certain period of time,including cases with complete response(CR),partial response(PR)and stable(SD).

## 12.4.5 Safety Analysis

All safety analyses will be based on the Safety Analysis Set.

Adverse events (AEs) will be coded using MedDRA and graded according to CTCAE 5.0. The incidence, number of cases, and frequency of all AEs, treatment-emergent adverse events (TEAEs), AEs related to the study drug, serious adverse events (SAEs) related to the study drug, all SAEs, AEs leading to treatment discontinuation, and fatal AEs will be summarized and described. If a subject experiences multiple adverse events, they will be counted as one case when calculating incidence rates. If a subject experiences the same AE multiple times, it will be counted as one case in the incidence calculation for that AE.

AEs will be summarized in frequency tables by System Organ Class (SOC) and Preferred Term (PT). Incidence rates will be calculated by system and symptom/sign (counted as the number of subjects who experienced a specific AE at least once).

For severity analysis of AEs and adverse drug reactions (ADRs): If a subject experiences the same AE multiple times, the most severe occurrence will be used in the analysis of the AE’s severity.

A list of all AEs, TEAEs, and study treatment-related AEs will be provided.

Laboratory test results, vital signs, and electrocardiogram (ECG) findings will be analyzed using shift tables comparing pre- and post-treatment values, descriptive statistics, and changes from baseline (if applicable).

## 12.4.6 Population Pharmacokinetics (PPK) Analysis

The PPK analysis will be based on the Pharmacokinetic Analysis Set (PAS).

Descriptive statistical analysis will be performed for PK concentration data at each time point.

The PopPK method will be used to analyze Ctrough (trough concentration) using a nonlinear mixed-effects model.

## Quality Control and Assurance

Clinical study sites must be drug clinical trial institutions certified by the NMPA with clinical research capabilities. Investigators must be physicians trained in clinical trials and work under the guidance of senior professionals. Medication administration to subjects will be performed by qualified personnel to ensure detailed understanding of drug intake and subject compliance. All study centers must strictly adhere to the study protocol and accurately complete the electronic Case Report Form (eCRF).

To ensure compliance with this study protocol and Good Clinical Practice (GCP) requirements, Nanjing Chuangte Pharmaceutical Technology Co., Ltd. or its collaborators will conduct regular monitoring visits during the study. Monitors will verify source documents to confirm the accuracy of information recorded in the case report forms. Investigators and institutions shall permit monitors from Nanjing Chuangte Pharmaceutical Technology Co., Ltd., its collaborators, or relevant regulatory authorities to directly access source documents for verification.

Study sites will also undergo audits by Institutional Review Boards (IRB)/Independent Ethics Committees (IEC), and/or quality assurance audits by the sponsor, and/or inspections by relevant regulatory authorities.

During monitoring visits and potential audits or inspections, investigators and relevant personnel shall ensure availability and allocate sufficient time to participate in the entire process.

## Study Management

## 14.1 Protocol Amendments

Any appropriate amendments to the protocol during the course of the study will be communicated and agreed upon by the sponsor and the investigator. The sponsor shall ensure timely submission of protocol amendments to regulatory authorities.

All protocol amendments (except those made to eliminate immediate hazards to subjects participating in the trial) must be approved by the Ethics Committee (EC) and regulatory authorities (if required) before implementation. Amendments made to eliminate immediate hazards to subjects participating in the trial may be implemented prior to EC approval.

## 14.2 Protocol Deviations

The investigator shall conduct the study in accordance with the protocol approved by the sponsor, regulatory authorities (if required), and the Ethics Committee.

Deviation from the study protocol is not permitted unless it is necessary to eliminate immediate hazards to subjects participating in the study.

If a protocol deviation occurs, the investigator must notify the sponsor or the sponsor’s designated personnel. Any protocol deviation must be documented in the Protocol Deviation Report Form.

## Study Termination Statistical analysis will be conducted when 268 PFS events are obtained.

The trial will be concluded when 80% of the OS endpoint events are reached or 24 months after the last subject is enrolled (whichever occurs first), marking the completion of the entire clinical study.

Subjects who have not experienced disease progression (PD) at the end of the clinical trial and are deemed by the investigator to benefit from the study may continue to receive the corresponding medication free of charge. Safety and efficacy data will continue to be collected, but no further related tests will be arranged.

## Retention of Study Records

In accordance with Chinese laws and regulations, the sponsor and the principal investigator shall ensure that the study master file contains or has contained relevant documents. The sponsor shall retain study documents for at least 5 years after marketing, and the investigator shall retain study documents for at least 5 years after the study ends. During the study, the master file must:

- Be readily available for inspection by regulatory authorities;
- Be complete and clearly documented.

All study data ownership belongs to the sponsor. The final clinical study report will be prepared based on the study results and in accordance with NMPA regulations.

All correspondence related to this study (e.g., communications with the sponsor and Ethics Committee) shall be retained in the corresponding files.

Original subject records, CRFs, and IMP inventory lists related to the study must be archived. Records must be retained in accordance with current GCP requirements.

The sponsor and principal investigator shall ensure that subjects’ medical records are retained for at least 5 years after marketing. The sponsor shall designate a responsible person to archive documents that should be or have been included in the study master file. Only authorized personnel may access these files. If ownership of clinical trial data or documents is transferred:

- The sponsor shall document such transfers;
- The new document owner shall retain and archive the data in accordance with Chinese regulations.

If the investigator changes, withdraws from the study, or retires, the responsibility for record retention may be transferred to their successor. Notification of the change must be made in advance and approved by the sponsor.

## Ethical Regulations

## 15.1 Institutional Review Board (IRB)/Independent Ethics Committee (IEC)

The investigator’s responsibility is to obtain approval for this clinical study protocol, protocol amendments, informed consent forms, and other relevant documents (e.g., recruitment advertisements). All documents communicated with the IRB/IEC should be retained in the investigator’s file. A copy of the IRB/IEC approval should be submitted to the sponsor.

## Ethical Conduct in the Study

The study shall be conducted in accordance with legal and regulatory requirements, the International Ethical Guidelines for Biomedical Research Involving Human Subjects (CIOMS 2002), the GCP Guidelines (ICH 1996), and the Declaration of Helsinki (WMA 2013). Additionally, the study shall comply with this protocol, the International Conference on Harmonisation (ICH)—Good Clinical Practice (GCP), and the regulations and laws of the study site.

## 15.3 Subject Information and Informed Consent

All parties involved in the study must maintain the confidentiality of subjects' personal information. In any sponsor-related forms, reports, publications, or other public disclosures, subjects' names will not be included unless required by law. Identifiable data such as names, addresses, birthdates, and other personal identifiers will be replaced with a unique code provided by Nanjing Chuangte Pharmaceutical Technology Co., Ltd., ensuring subject de-identification. During data transfer, Nanjing Chuangte Pharmaceutical Technology Co., Ltd. will implement stringent measures to protect subject confidentiality and personal data.

The informed consent process must comply with ICH-GCP guidelines and local regulatory and legal requirements.

The informed consent form (ICF) used in this study, along with any subsequent modifications, must be approved by the IRB/IEC and the sponsor prior to implementation.

## Sponsor’s Criteria for Terminating a Study

The study may be terminated prematurely due to regulatory decisions, changes in IRB/IEC opinions, drug safety concerns, or sponsor considerations. Additionally, the sponsor reserves the right to discontinue the development of FHND9041 at any time.

If the study is terminated or suspended prematurely, the sponsor will immediately notify the investigators, clinical trial sites, and ethics committees. Upon receiving such notification, investigators must contact all subjects and hospital pharmacies (if applicable) within the specified timeframe. All study data must be collected, and eCRF completion must be maximized as per the sponsor’s requirements.

## Investigator Publications

Nanjing Chuangte Pharmaceutical Technology Co., Ltd. does not oppose the publication of any information collected or generated by investigators, regardless of whether the results are favorable to the study drug. However, to prevent inadvertent disclosure of confidential information, investigators must provide the sponsor with the full manuscript, abstract, or any other planned publication materials (e.g., posters, invited lectures) at least 30 days prior to submission or public presentation. If additional actions are required to protect intellectual property, investigators agree to delay publication for no more than 60 days. If necessary, investigators must remove any previously undisclosed confidential information (excluding study results) prior to publication.

For multicenter studies, investigators agree to prioritize the publication of combined multicenter results. However, if a multicenter publication has not been submitted within 12 months of study completion or termination at all sites, investigators may independently publish their findings in accordance with the other requirements outlined in this section.

All publications related to the study must adhere to ethical standards for authorship and reporting, including the "Ethical Considerations in the Conduct and Reporting of Research" section (Chapter II) of the *Uniform Requirements for Manuscripts Submitted to Biomedical Journals*. The International Committee of Medical Journal Editors (ICMJE) guidelines can be accessed at: http://www.icmje.org/index.html#authorship.

The clinical research agreement between Nanjing Chuangte Pharmaceutical Technology Co., Ltd. and the research institution will also include provisions regarding the publication of study results.

## References

[1]中国医师协会肿瘤医师分会，中国医疗保健国际交流促进会肿瘤内科分会. IV期原发性肺癌中国治疗指南（2021年版）[J]中华肿瘤杂志2021. 43（1）：39~59.

[2] 周彩存, 王洁, 王宝成, 等. 中国非小细胞肺癌免疫检查点抑制剂治疗专家共识（2020年版）. 中国肺癌杂志, 2021, 24(4): 217-235.

[3]中国临床肿瘤学会血管靶向治疗专家委员会，中国临床肿瘤学会非小细胞肺癌专家委员会，中国临床肿瘤学会非小细胞肺癌抗血管生产药物治疗专家组.晚期非小细胞肺癌抗血管生成药物治疗中国专家共识（2020版）[J]中华肿瘤杂志. 2020. 42（12）：1063~1077.

[4] Harvey R.D,Adams R.V et al. Afatinib for the treatment of EGFR mutation-positive NSCLC: A review of clinical findings[J]Journal of Oncology Pharmacy Practice. 2020, Vol. 26(6) 1461–1474

[5] FDA CENTER FOR DRUG EVALUATION AND RESEARCH MEDICAL REVIEW(S).APPLICATION.NUMBER:201292Origls000.<https://www.accessdata.fda.gov/drugsatfda_docs/>nda/2013/201292Orig1s000MedR.pdf

[5] Sequist V.L, Yang C-H.J, et al. Phase III Study of Afatinib or Cisplatin Plus Pemetrexed in Patients With Metastatic Lung Adenocarcinoma With EGFR Mutations[J]Journal of Clinical Oncology. 2013.31(27): 3327-3334.

[6] Schuler M., Yang C.-H. J. et al, Afatinib beyond progression in patients with non-small cell lung cancer following chemotherapy, erlotinib/gefitinib and Afatinib: phase III randomized LUX-Lung 5 trual[J]Annals of Oncology 2016. 27: 417-423.

[7] Paz-Ares L., Tan E.-H. et al. Afatinib versus gefitinib in patients with EGFR mutation-positive advanced non-small-cell lung cancer:overall survival data from the phase IIb LUX-Lung 7 trial[J]Annals of Oncology. 2017 28: 270-277.

[8] Guo Y., Ahn M.-J. et al. Afatinib versus methotrexate as second-line treatment in Asian patients with recurrent or metastatic squamous cell carcinoma of the head and neck progressing on or after platinum-based thorapy(LUX-Head & Neck3): an open-label, randomized phase III trial[J]Annals of Oncology. 2019. 30: 1831-1839.

[9] Schuler M., Paz-Ares L. et al. First-line Afatinib for advanced EGFRm+ NSCLC: Analysis of long-term responders in the LUX-Lung 3, 6, and 7 trials[J]Lung Cancer.2019. 133: 10-19.

[10] Miller A. V.，Hirsh V. et al. Afatinib versus placebo for patients with advanced, metastatic non-small-cell lung cancer after failure of erlotinib, gefi tinib, or both, and one or two lines of chemotherapy (LUX-Lung 1): a phase 2b/3 randomised trial[J]Lancet Oncology 2012. 13: 528-538.

[11] Wu Y. L., Zhou C. et al. Afatinib versus cisplatin plus gemcitabine for fi rst-line treatment of Asian patients with advanced non-small-cell lung cancer harbouring EGFR mutations (LUX-Lung 6): an open-label, randomised phase 3 trial[J] Lancet Oncology 2014. 15: 213-222.

[12] Saria J-C., Felip E. et al. Afatinib versus erlotinib as second-line treatment of

patients with advanced squamous cell carcinoma of the lung (LUX-Lung 8): an open-label randomised controlled phase 3 trial[J] Lancet Oncology 2015. July 6.

[13] Park K., Tan E.-H. et al. Afatinib versus gefi tinib as fi rst-line treatment of patients with EGFR mutation-positive non-small-cell lung cancer (LUX-Lung 7): a phase 2B, open-label, randomized controlled trial [J] Lancet Oncology 2016. April 12.

[14] GILOTRIF™ (Afatinib)片说明书

[15] FHND9041胶囊研究者手册

## Appendix 1: ECOG Performance Status Scale

Table Appendix-1 ECOG Performance Status Scale

| Score | Performance Status |
| --- | --- |
| 0 | Fully active, able to carry on all pre-disease performance without restriction. |
| 1 | Restricted in physically strenuous activity but ambulatory and able to carry out light work or perform sedentary tasks, such as light housework or office work. |
| 2 | Ambulatory and capable of all self-care but unable to work; up and about for more than 50% of waking hours. |
| 3 | Capable of only limited self-care; confined to bed or chair for more than 50% of waking hours. |
| 4 | Completely disabled; unable to carry out any self-care; totally confined to bed or chair. |
| 5 | Dead. |

## Appendix 2: RECIST 1.1 Tumor Response Evaluation Criteria

Baseline Evaluation Criteria for Determining Tumor Lesions as Measurable or Non-Measurable

**Measurable Lesions:**
Lesions that can be measured accurately in at least one dimension, with the minimum size as follows:

Non-lymph node lesions assessed by CT scan with a minimum size of 10 mm (CT slice thickness ≤5 mm).

Clinical lesions with a minimum size of 10 mm, measurable with a caliper (lesions not measurable with a caliper should be classified as non-measurable).

Lesions with a minimum size of 20 mm on chest X-ray.

Lymph node lesions with a short axis of ≥15 mm on CT scan (CT slice thickness ≤5 mm).

**Non-Measurable Lesions:**
Non-measurable lesions include small lesions (longest diameter <10 mm or lymph nodes with a short axis ≥10 mm but <15 mm) and truly non-measurable lesions such as:

Ascites, pleural effusion, or pericardial effusion.

Bone lesions.

Leptomeningeal or cerebrospinal metastases.

Inflammatory breast cancer, skin, or pulmonary lymphangitic carcinomatosis.

Lymph nodes with a short axis <10 mm are considered non-pathological and do not need to be recorded or followed.

Abdominal masses or visceral organ enlargements identified only by physical examination without imaging evidence for comparison.

**Special Lesions:**

Bone Lesions: Bone scans, PET scans, or X-rays cannot be used to measure bone lesions, but these methods can confirm the presence or resolution of lesions. Lytic or mixed lytic-blastic bone lesions with soft tissue components meeting measurable criteria (assessed by CT or MRI) can be classified as measurable. Purely blastic bone lesions are non-measurable.

Cystic Lesions: Lesions meeting imaging criteria for simple cysts should not be categorized as malignant lesions (regardless of measurability) but rather documented as simple cysts. Cystic lesions suspected to represent cystic metastases may be considered measurable when fulfilling the aforementioned measurable criteria. However, when both cystic and solid lesions coexist, solid lesions should be preferentially selected as target lesions.

Previously Treated Lesions: Lesions in previously irradiated or locally treated areas are generally non-measurable unless progression is documented.

Solitary Lesions: A solitary measurable lesion must be confirmed by cytology or imaging to verify its nature.

**Recording Tumor Measurements:**

A maximum of two lesions per organ and five in total should be selected as target lesions. These lesions should be measured and recorded at baseline and during study evaluations. Target lesions should be selected based on size (longest diameter) and ability to undergo precise and repeatable measurement.

Record the longest diameter of each target lesion and calculate the sum of these diameters. Use this sum as the reference for evaluating measurable disease response during the study.

Lymph nodes with a short axis of ≥15 mm on CT are measurable target lesions. Only the short axis of lymph nodes is recorded for the baseline sum of diameters.

Target Lesion Selection and Measurement:

A maximum of 2 lesions per organ and 5 lesions in total, representative of all involved organs, should be identified as target lesions. These lesions must be measured and documented at baseline and at predefined time points throughout the study period. Target lesion selection should be based on lesion size (those with the longest diameter) and the feasibility of obtaining reproducible, accurate measurements (through imaging studies or clinical examination).

The longest diameter of each target lesion should be recorded. The sum of the longest diameters of all target lesions should be calculated and documented, serving as the reference for therapeutic response evaluation during the study.

Pathological lymph nodes are considered measurable lesions and should be evaluated differently from other lesions. Lymph nodes meeting the criterion of short axis ≥15 mm on CT scans may be selected as target lesions. Only the sum of the short axes of these lymph nodes should be recorded at baseline measurement.Two-dimensional measurement should be performed in the imaging plane (axial plane for CT; axial, sagittal, or coronal planes for MRI). The smaller measurement value should be recorded as the short axis.

Baseline Sum Calculation:

• Calculate the sum of diameters for all target lesions (longest diameter for non-lymph node lesions; short axis for lymph nodes) and record as the baseline sum.

• This baseline sum will serve as the reference for therapeutic response evaluation of measurable lesions during the study.

Non-Target Lesion Documentation:

• All other non-target lesions (or disease sites) should be documented during baseline assessment.

• These lesions do not require measurement but should be followed to record their status as "present," "absent," or in rare cases, "unequivocal progression."

• Multiple non-target lesions in the same organ should be recorded under a single entry in the case report form (e.g., "multiple confluent lymph nodes in pelvis" or "multiple liver metastases").

**Definitions of Tumor Response for Target Lesions:**

Complete Response (CR): Disappearance of all target lesions, with short axis of pathological lymph nodes (including both target and non-target lesions) reduced to <10 mm.

Partial Response (PR): A ≥30% decrease in the sum of target lesion diameters.

Progressive Disease (PD): A ≥20% increase in the sum of target lesion diameters compared to the smallest recorded sum (including the baseline sum, if it is the smallest) and the absolute increase must be >5 mm. Alternatively, the appearance of one or more new lesions is also considered PD.

Stable Disease (SD): Changes between PR and PD.

Notes:

If only one target lesion shows a ≥20% increase in the longest diameter, while the overall sum of the longest diameters of all target lesions does not meet PD criteria, the assessment should not be classified as PD.

For lymph nodes included as target lesions, nodes that shrink to "normal size" (<10 mm) should still be measured and reported. If lymph node enlargement is the basis for determining progression, to avoid overestimating PD, even normal-sized lymph nodes should be documented. In such cases, even if a patient achieves CR, the sum of diameters cannot be recorded as "0" on the CRF.

**Non-Target Lesions Response Criteria:**

Non-target lesions may be measurable but only require qualitative assessment at protocol-specified time points.

• CR: Disappearance of all non-target lesions and normalization of tumor marker levels. All lymph nodes must be non-pathological in size (short axis <10 mm).

• Non-CR/Non-PD: Persistence of one or more non-target lesions and/or maintenance of tumor marker levels above normal limits.

• PD: Unequivocal progression of existing non-measurable lesions. (Note: Appearance of one or more new lesions is also considered progression.)

**Cytology and Histology:**

Cytological confirmation may be considered to differentiate between response/stable disease and progression when measurable tumors have achieved response or stable disease. For subjects with effusions or ascites:

• Only cytologically confirmed cases should be recorded in the CRF.

• Effusions without cytological evaluation or confirmed as non-malignant should not be recorded in the eCRF.

**New Lesions:**

• Appearance of new malignant lesions should be considered PD.

• New lesions must be unequivocal (not attributable to imaging technique differences or modality changes).

• If a new lesion is uncertain due to small size, its nature should be confirmed through further treatment and follow-up.

• If repeat scans confirm new lesions, the progression date should be recorded as the date of initial scan detection.

**FDG-PET Assessment:**

FDG-PET may complement CT for PD evaluation, particularly for potential new lesions. New lesions detected by FDG-PET imaging should be evaluated using the following rules:

• Negative FDG-PET at baseline becomes positive on follow-up.

• If FDG-PET was not performed at baseline and a positive FDG-PET is observed during follow-up: When the positive FDG-PET corresponds to a new site confirmed by CT, it should be considered PD.

• If FDG-PET during follow-up is positive without CT confirmation, additional CT scanning is required to confirm new lesions (if progression is confirmed, the PD date should be recorded as the date of initial FDG-PET abnormality).

• If FDG-PET positive lesions during follow-up correspond to previously identified CT lesions without anatomical imaging evidence of progression, it should not be considered PD.

**Confirmation of Tumor Response:**

• Response confirmation is required for non-randomized trials with response rate as primary endpoint.

• In randomized studies, response confirmation is not required due to the presence of control groups for appropriate data reference.

It is determined by changes in target lesions, non-target lesions, and the presence of new lesions. The evaluation of total response should include all parameters in the table below.

Attached to the table-1 Efficacy evaluation criteria for solid tumors

| Target lesions | Non-target lesions | New lesions | Total efficacy |
| --- | --- | --- | --- |
| CR | CR | No | CR |
| CR | Non-CR/non-PD | No | PR |
| CR | Not rated | No | PR |
| PR | Non-PD or not fully evaluated | No | PR |
| SD | Non-PD or not fully evaluated | No | SD |
| Not fully rated | Non-PD | No | NE |
| PD | Any efficacy | Yes or No | PD |
| Any efficacy | PD | Yes or No | PD |
| Any efficacy | Any efficacy | Yes | PD |
| CR: complete response; PR: partial response; SD: stable disease; PD: disease progression; NE: Not evaluable | | | |

**Best Overall Response:**

The best overall response can only be determined when all subject data are available.

In trials where confirmation of complete or partial response is not required (e.g., randomized trials), the best overall response is defined as the best response recorded at any time point (e.g., a subject with SD at initial assessment, PR at second assessment, and PR at final assessment). When SD is the best response, it must also meet the protocol-specified minimum duration from baseline. If the response at the best time point reaches SD but does not meet the minimum SD duration, the subject's best overall response should be determined based on subsequent evaluations. For example, if a subject has SD at initial evaluation and PD at second evaluation without meeting the minimum SD duration, their best overall response should be recorded as PD. If the subject is lost to follow-up after initial SD assessment, it should be recorded as unevaluable.

For trials requiring confirmation of CR and PR (e.g., non-randomized trials with response rate as primary endpoint), the best overall response should be determined by tumor response during the trial. CR or PR can only be confirmed if the criteria are met at the protocol-specified subsequent time point (typically 4 weeks later).

When subjects require discontinuation of treatment due to deterioration of general health status without objective evidence of disease progression, this should be reported as "symptomatic deterioration." Every effort should be made to document objective disease progression even after treatment discontinuation. Symptomatic deterioration is a reason for discontinuing study treatment but should not be considered as an efficacy outcome. The objective response for such subjects should be determined based on evaluation of target and non-target lesions.

In some cases, it may be difficult to distinguish residual lesions from normal tissue. When this distinction is crucial for determining CR, fine-needle aspiration or biopsy is recommended to confirm CR. FDG-PET, as an imaging technique somewhat analogous to biopsy, may be used to evaluate response as CR when it suggests that radiologically visible residual lesions represent fibrosis or scar formation. The use of FDG-PET in such cases should be prospectively described in the protocol and supported by disease-specific medical literature. However, it is important to recognize that both FDG-PET and biopsy, due to their resolution/sensitivity limitations, may lead to false-positive CR determinations.

## Appendix 3: Improved RANO evaluation criteria

Appendix - 3 CNS Metastases Evaluation - Modified RANO Evaluation Criteria

| Target lesions | Contrast-enhanced lesions, length diameter ≥ 10 mm, vertical plane measurement ≥ 5 mm  Lesions can be seen in 2 or more consecutive layers, with a distance of ≤5 mm (ideally 1.5 mm) between each layer and 0 mm blank  Avoid cystic lesions or postoperative cavity lesions (nodules  ≥ 10 mm in length and diameter, and lesions with a vertical surface ≥ 5 mm should be considered as target lesions), as cystic lesions or postoperative cavity lesions are usually non- measurable  Measured in the axial plane, the post-contrast T1 image is preferred  A maximum of 5 lesions were selected intracranially  Choosing the size of the lesion should allow for repeat measurements  Untreated lesions are preferred, and treated lesions (other than those that have undergone stereotactic radiosurgery) may be considered if they have progressed locally  Calculate the sum of diameters (composite of the longest diameter of all brain target lesions) |
| --- | --- |
| Non-target lesions | All measurable lesions that were not selected as target lesions were included  The length and diameter of the lesion < 10mm, the boundary cannot be repeated, meningeal metastasis, skull metastasis, only cystic lesions, meningeal metastasis  Multiple lesions in the skull may be clustered and fused, and evaluated together  There is no limit to the number of non-target lesions |

Appendix - 4 CNS metastases (Lin et al and Schmind et al)-Modified RANO evaluation criteria

| MRI | Examination methods and techniques should be consistent  with the baseline |
| --- | --- |
| Gadolinium-enhanced MRI is used, and CT with or without  contrast can be used if MRI is contraindicated |
| The spacing of each layer is ≤ 5mm (ideally 1.5mm) and 0mm blank, and the T1 images before and after are  compared |
| The actual target lesion size should be measured. If the target lesion disappears, it is recorded as 0 mm, but the size cannot be measured and the default value of 5 mm should  be used |
| If the target lesion is confluent and cannot be separated during treatment, the maximum length diameter of the fused  lesion should be measured |
| If the target lesions are separated to form discrete lesions at subsequent time points, the longest diameter of each lesion  reported should be calculated separately |

## Appendix 4：EORTC C30/LC13 QOL Questionnaire &LCSS

| EORTC QLQ-C30 (version 3) Quality of Life Questionnaire | | | | |
| --- | --- | --- | --- | --- |
| Did the subject complete the EORTC QLQ-C30 Quality of Life Questionnaire?  □Yes □ No | | | | |
| Survey Date: | | | | |Year| | ||Month| | |Day | | | | |
| 1. Do you find it difficult when you do  some strenuous movements, such as lifting heavy shopping bags or  suitcases? | | □1 does not have □2 a little  □3 has some □4 very much | | |
| 2. Do you find it difficult to walk long distances? | | □1 does not have □2 a little  □3 has some □4 very much | | |
| 3. Do you find it difficult to take a short walk outdoors? | | □1 does not have □2 a little  □3 has some □4 very much | | |
| 4. Do you have to stay in bed or sit in a chair during the day? | | □1 does not have □2 a little  □3 has some □4 very much | | |
| 5. Do you need help eating, dressing, washing or going to the toilet? | | | □1 does not have □2 a little  □3 has some □4 very much | | | |
| In the past week: | | |  | | | |
| 6. Are you physically limited in your work or daily activities? | | | □1 does not have □2 a little  □3 has some □4 very much | | | |
| 7. Are your hobbies and leisure activities physically restricted? | | | □1 does not have □2 a little  □3 has some □4 very much | | | |
| 8. Have you ever felt short of breath? | | | □1 does not have □2 a little  □3 has some □4 very much | | | |
| 9. Have you ever had pain? | | | □1 does not have □2 a little  □3 has some □4 very much | | | |
| 10. Have you ever needed to take a break? | | | □1 does not have □2 a little  □3 has some □4 very much | | | |
| 11. Have you ever felt like you had trouble sleeping? | | | □1 does not have □2 a little  □3 has some □4 very much | | | |
| 12. Have you ever felt weak? | | | □1 does not have □2 a little  □3 has some □4 very much | | | |
| 13. Have you ever felt like you had no appetite? | | | □1 does not have □2 a little  □3 has some □4 very much | | | |
| 14. Have you ever felt nauseous and want to throw up? | | | □1 does not have □2 a little  □3 has some □4 very much | | | |
| 15. Have you ever vomited? | | | □1 does not have □2 a little  □3 has some □4 very much | | | |
| 16. Have you ever had constipation? | | | □1 does not have □2 a little  □3 has some □4 very much | | | |
| 17. Have you ever had diarrhea? | | | □1 does not have □2 a little  □3 has some □4 very much | | | |
| 18. Have you ever felt tired? | | | □1 does not have □2 a little  □3 has some □4 very much | | | |
| 19. Does the pain hinder your daily activities? | | | □1 does not have □2 a little  □3 has some □4 very much | | | |
| 20. Do you have a hard time concentrating on something like reading a newspaper or watching TV? | | | □1 does not have □2 a little  □3 has some □4 very much | | | |
| 21. Have you ever felt nervous? | | | □1 does not have □2 a little  □3 has some □4 very much | | | |
| 22. Have you ever felt worried? | | | □1 does not have □2 a little  □3 has some □4 very much | | | |
| 23. Have you ever felt easily angered? | | | □1 does not have □2 a little  □3 has some □4 very much | | | |
| 24. Have you ever felt depressed? | | | □1 does not have □2 a little  □3 has some □4 very much | | | |
| 25. Have you ever had trouble remembering? | | □1 does not have □2 a little  □3 has some □4 very much | | | |
| 26. Is your medical condition or treatment process hindering your family life? | | □1 does not have □2 a little  □3 has some □4 very much | | | |
| 27. Do you have a medical condition or treatment that prevents you from  socializing? | | □1 does not have □2 a little  □3 has some □4 very much | | | |
| 28. Did your medical condition or treatment process cause you financial hardship? | | □1 does not have □2 a little  □3 has some □4 very much | | | |
| For the following questions, the numbers 1-7 represent a scale from "very poor" to "very good", circle the answer between 1 and 7 that is most appropriate for you. | | | | | |
| 29. How would you rate your overall health over the past week? | | □1 □2 □3 □4 □5 □6 □7 | | | |
| 30. How would you rate your overall quality of life over the past week? | | □1 □2 □3 □4 □5 □6 □7 | | | |
| EORTC QLQ-LC13 Quality of Life Questionnaire  (Patients sometimes have the following clinical signs.) Please indicate the extent of these clinical symptoms or problems that you have experienced in the past week and circle the answers that work best for you. ） | | | | | |
| In the past week: | |  | | | |
| 31. Do you cough a lot? | | □1 does not have □2 a little  □3 has some □4 very much | | | |
| 32. Do you cough up blood (blood in your sputum)? | | □1 does not have □2 a little  □3 has some □4 very much | | | |
| 33. Do you feel short of breath when you rest? | | □1 does not have □2 a little  □3 has some □4 very much | | | |
| 34. Do you feel short of breath when you go for a walk? | | □1 does not have □2 a little  □3 has some □4 very much | | | |
| 35. Do you feel short of breath when you climb stairs? | | □1 does not have □2 a little  □3 has some □4 very much | | | |
| 36. Have you ever had pain in your mouth or tongue? | | □1 does not have □2 a little  □3 has some □4 very much | | | |
| 37. Have you ever had difficulty swallowing? | | □1 does not have □2 a little  □3 has some □4 very much | | | |
| 38. Have you ever had numbness/tingling in your hands and feet? | | □1 does not have □2 a little  □3 has some □4 very much | | | |
| 39. Have you ever experienced hair loss? | | □1 does not have □2 a little  □3 has some □4 very much | | | |
| 40. Have you ever had chest pain? | | □1 does not have □2 a little  □3 has some □4 very much | | | |
| 41. Have you ever had pain in your arm or shoulder? | | □1 does not have □2 a little  □3 has some □4 very much | | | |
| Have you ever had pain in other parts of your body? | □1 does not have □2 a little  □3 has some □4 very much | | |
| If yes, write the part: |  | | |
| 43. Have you ever taken painkillers? | □1 does not have □2 a little  □3 has some □4 very much | | |
| If so, does it have a great painkiller effect? | □1 does not have □2 a little  □3 has some □4 very much | | |

**Lung Cancer Symptom Scale LCSS**

| Lung Cancer Symptom Scale LCSS | |
| --- | --- |
| Did the subject complete the Lung Cancer Symptom Scale LCSS? □ Yes  □ No | |
| Survey date: | | | | |year| | |month| | |day | |
| 1. How is your appetite? | □ is the best□ not bad□ average  □ not so good □ so bad that it couldn't be worse |
| 2. How tired do you feel? | □ don't feel tired at all, □ not very tired  □ □ are generally more tired, □ extremely tired |
| 3. Do you cough much? | □ didn't have any cough at all□ occasionally coughed □ coughed from time to time  □ often cough □ cough severely |
| 4. Are you panting a lot? | □ didn't have any □ gasping for air occasionally  □ gasping for air from time to time  □ often gasping for breath □ panting heavily |
| 5. How much blood does you have in your sputum? | □ didn't have any bloodshot at all, □ a little bloodshot  □ there's a lot of blood□ there's a lot of blood, there's so much □ there's no more |
| 6. Do you feel a lot of pain? | □ didn't feel it at all, □ occasionally felt pain, □ it hurt from time to time  □ often feel the pain □ so much that it can't be more |
| 7. How severe are your lung cancer symptoms? | □ wasn't serious at all, □ had mild symptoms, □ average  □ is more serious, □ very serious |
| 8. To what extent does your illness affect your normal life? | □ didn't affect at all □ had a little bit of an impact  □ impact is relatively large □ has a big impact  □ impact is so great that nothing can be done |
| 9. How do you assess your quality of life today? | □ is very high, □ is high, □ average  □ is low □ very low |
